# Supplementary material for: Light-fuelled nitro-reduction via cascaded electron donor–acceptor complexes in aqueous media
Source: Royal Society of Chemistry journal article supplement (doi:10.1039/d4gc02602k), 2024-01-01

## Supporting Information

### Light-fuelled nitro-reduction via cascaded electron donor-acceptor complexes in aqueous media

Xiaohui Zhuang,<sup>a</sup> Haijing Song,<sup>a</sup> Jiayin Wang,<sup>a</sup> Zhaokang Zhang,<sup>a</sup> Jiayang Wang,<sup>b</sup> Bin Sun,<sup>\*a, c</sup>  
Weike Su<sup>a, c</sup> and Can Jin<sup>\*a, c</sup>

<sup>a</sup> College of Pharmaceutical Sciences, Collaborative Innovation Center of Yangtze River Delta Region Green Pharmaceuticals, Zhejiang University of Technology, Hangzhou 310014, P. R. China.

<sup>b</sup> School of Life Sciences, HuZhou University, HuZhou, Zhejiang, PR China.

<sup>c</sup> Key Laboratory for Green Pharmaceutical Technologies and Related Equipment of Ministry of Education and Key Laboratory of Pharmaceutical Engineering of Zhejiang Province.

[jincan@zjut.edu.cn](mailto:jincan@zjut.edu.cn); [sunbin@zjut.edu.cn](mailto:sunbin@zjut.edu.cn);

## ***Table of Contents***

|                     |                                                           |
|---------------------|-----------------------------------------------------------|
| <b>Page S1</b>      | <b>General Information</b>                                |
| <b>Page S1-S2</b>   | <b>General procedure for the reduction of nitroarenes</b> |
| <b>Page S2-S3</b>   | <b>Calculation of EcoScale score</b>                      |
| <b>Page S4-S11</b>  | <b>Mechanism study</b>                                    |
| <b>Page S12-S27</b> | <b>Characterization Data for the products</b>             |
| <b>Page S27</b>     | <b>References</b>                                         |
| <b>Page S28-S94</b> | <b>NMR Spectra</b>                                        |

## I. General Information

All reactions were run in a tube under air atmosphere. All commercially available reagent grade chemicals and solvents were used as received without further purification.  $^1\text{H}$  NMR (400 MHz),  $^{13}\text{C}$  NMR (100 MHz) and  $^{19}\text{F}$  NMR (376 MHz) spectra are reported relative to chemical shift of tetramethylsilane (TMS). Chemical shifts ( $\delta$ ) are reported in ppm and coupling constants ( $J$ ) in hertz (Hz). The following abbreviations are used to explain the multiplicities: s = singlet, d = doublet, dd = doublet of doublet, t = triplet, q = quartet, m = multiplet. For HRMS (ESI) measurements, the mass analyzer is micrOTOF-Q.

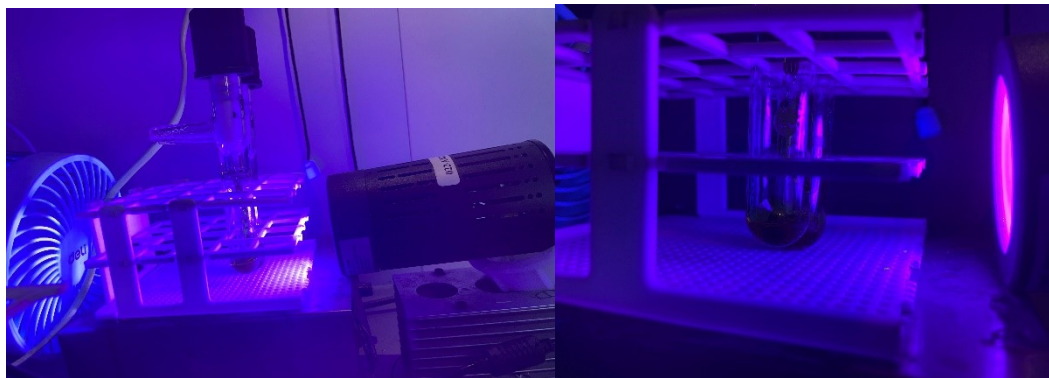

## II. General procedure for the reduction of nitroarenes

### (1) With the scale of 0.2 mmol

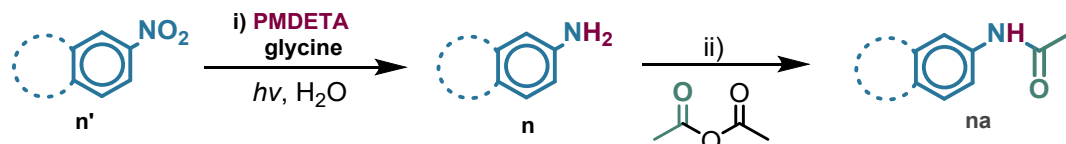

(i) A 10 mL tube was charged with nitroarenes **n'** (0.2 mmol), pentamethyldiethylenetriamine PMDETA (3.0 equivalent), glycine (1.0 equivalent) in  $\text{H}_2\text{O}$  (0.5 mL) upon irradiation of 100 W 390 nm LEDs at room temperature under  $\text{N}_2$  atmosphere for 24 h. (Notice: for the insoluble nitroarenes, EA may be added as appropriate to promote dissolution.) The reaction was monitored by TLC. After completion, the reaction mixture was quenched with water (10 mL) and extracted with dichloromethane for three times. The combined organic phase was dried over anhydrous  $\text{Na}_2\text{SO}_4$ , filtered, and evaporated to leave a residue, which was purified by silica gel column chromatography with petroleum ether/ ethyl acetate (from 10 :1) to give the pure desired product **38A-38B, 39-61**.

(ii) A 25 mL round bottom flask was charged with acetic anhydride (2.0 equivalent), DMAP (20% mmol) and concentrated solution, which is extracted from the previous step, in DCM (5 mL) at rt to 80 °C temperature for 30 min to 10 h. The reaction was monitored by TLC. After completion, the reaction mixture was quenched with water (10 mL) and extracted with dichloromethane for three times. The combined organic phase was dried over anhydrous  $\text{Na}_2\text{SO}_4$ , filtered, and evaporated to leave a residue, which was purified by silica gel column chromatography with petroleum ether/ ethyl acetate (from 5 :1) to give the pure desired product **1a-37a**.

## (2) With the scale of 10 mmol (gram scale)

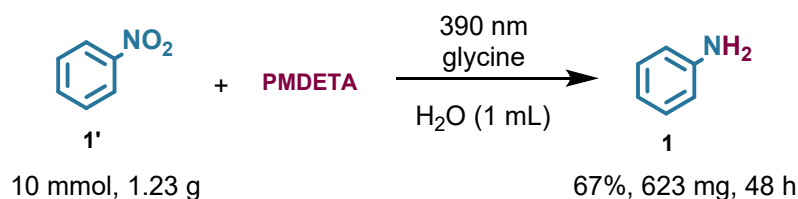

A 10 mL tube was charged with **1'** (10.0 mol), pentamethyldiethylenetriamine PMDETA (3.0 equivalent), glycine (1.0 equivalent) in H<sub>2</sub>O (1 mL) upon irradiation of 100 W 390 nm LEDs at room temperature under N<sub>2</sub> atmosphere for 48 h. The reaction was monitored by TLC. After completion, the reaction mixture was quenched with water (15 mL) and extracted with dichloromethane for three times. The combined organic phase was dried over anhydrous Na<sub>2</sub>SO<sub>4</sub>, filtered, and evaporated to leave a residue, which was purified by silica gel column chromatography with petroleum ether/ ethyl acetate (from 10 :1) to give the pure desired product **1** in a yield of 67%.

## III. Calculation of Ecoscale score

### (1) Table S1. Calculation of Ecoscale score for this work

**Eco Scale = 100 -Sum of individual penalties**  
**Score on Eco Scale: >75, Excellent; >50, Acceptable; <50, Inadequate**

#### A. Calculation of Penalty Points:

| Parameters                                                                          | Penalty Points |
|-------------------------------------------------------------------------------------|----------------|
| 1. Yield: (100- % of yield)/2 = (100-85)/2                                          | 7.5            |
| 2. Price of reaction components (To obtain 10 mmol of end product, <b>60</b> )      |                |
| a. ethyl <i>p</i> -nitrobenzoate ( <b>60'</b> ) = 11.76 mmol = 2.295 g = USD 0.6    |                |
| b. pentamethyldiethylenetriamine (PMDETA) = 35.28 mmol = 6.114 g = USD 1.22         |                |
| c. glycine = 11.76 mmol = 0.882 g = USD 0.066                                       |                |
| Total cost of synthesis of <b>60</b> = (0.6 + 1.22 + 0.066) = USD 1.886             |                |
| Thus inexpensive, since (total cost of synthesis of 10 mmol of <b>60</b> ) < \$ 10: | 0              |
| 3. Safety                                                                           |                |
| PMDETA (T)                                                                          | 5              |
| 4. Technical Setup                                                                  |                |
| photochemical activation                                                            | 2              |
| 5. Temperature/time                                                                 |                |
| Room temperature, 24 h                                                              | 1              |
| 6. Workup and purification                                                          |                |
| Liquid-liquid extraction                                                            | 3              |
| Classical chromatography                                                            | 10             |
| <b>Total penalty points:</b>                                                        | <b>28.5</b>    |

#### B. Ecoscale calculation:

**EcoScale score:** (100-28.5) = **71.5 (> 50; it is an acceptable synthesis)**



**(2) Table S2. Calculation of Ecoscale score for the site-selective nitro reduction method involved metal-loaded catalysts<sup>1</sup>**

**Eco Scale = 100 -Sum of individual penalties**

**Score on Eco Scale: >75, Excellent; >50, Acceptable; <50, Inadequate**

**A. Calculation of Penalty Points:**

| Parameters                                                                                                                                             | Penalty Points |
|--------------------------------------------------------------------------------------------------------------------------------------------------------|----------------|
| 1. Yield: (100- % of yield)/2 = (100-99.9)/2                                                                                                           | <b>0.05</b>    |
| 2. Price of reaction components (To obtain 10 mmol of end product, <b>60</b> )                                                                         |                |
| a. ethyl <i>p</i> -nitrobenzoate ( <b>60'</b> ) = 11.76 mmol = 2.295 g = USD 0.6                                                                       |                |
| b. catalyst ( <b>10Cu-5Ni/AISBA-R</b> ) = not considered                                                                                               |                |
| c. H <sub>2</sub> = not considered                                                                                                                     |                |
| Due to the difficulty of estimating the amount of hydrogen gas, the parameters for the price of components are not being considered for the time being | <b>0</b>       |
| 3. Safety                                                                                                                                              |                |
| Ni(NO <sub>3</sub> ) <sub>2</sub> ·6H <sub>2</sub> O (N)                                                                                               | <b>5</b>       |
| Na <sub>2</sub> SiO <sub>3</sub> (N)                                                                                                                   | <b>5</b>       |
| Pluronic P123 (T)                                                                                                                                      | <b>5</b>       |
| H <sub>2</sub> (F <sup>+</sup> )                                                                                                                       | <b>10</b>      |
| THF (F)                                                                                                                                                | <b>5</b>       |
| 4. Technical Setup                                                                                                                                     |                |
| Pressure equipment, 2.5 MPa                                                                                                                            | <b>3</b>       |
| 5. Temperature/time                                                                                                                                    |                |
| Heating (95 °C), 3 h                                                                                                                                   | <b>3</b>       |
| 6. Workup and purification                                                                                                                             |                |
| Liquid-liquid extraction                                                                                                                               | <b>3</b>       |
| Classical chromatography                                                                                                                               | <b>10</b>      |
| <b>Total penalty points:</b>                                                                                                                           | <b>49.05</b>   |

**B. Ecoscale calculation:**

**EcoScale score:** (100-49.05) = **50.95 (> 50; it is an acceptable synthesis)**

*The result unveiled that this EDA complex-based strategy demonstrated higher economic and ecology benefits (71.5) compare to the reported metal-catalyzed hydrogenation (50.95).*

**IV. Mechanism study**

## (1) Intermediates investigation

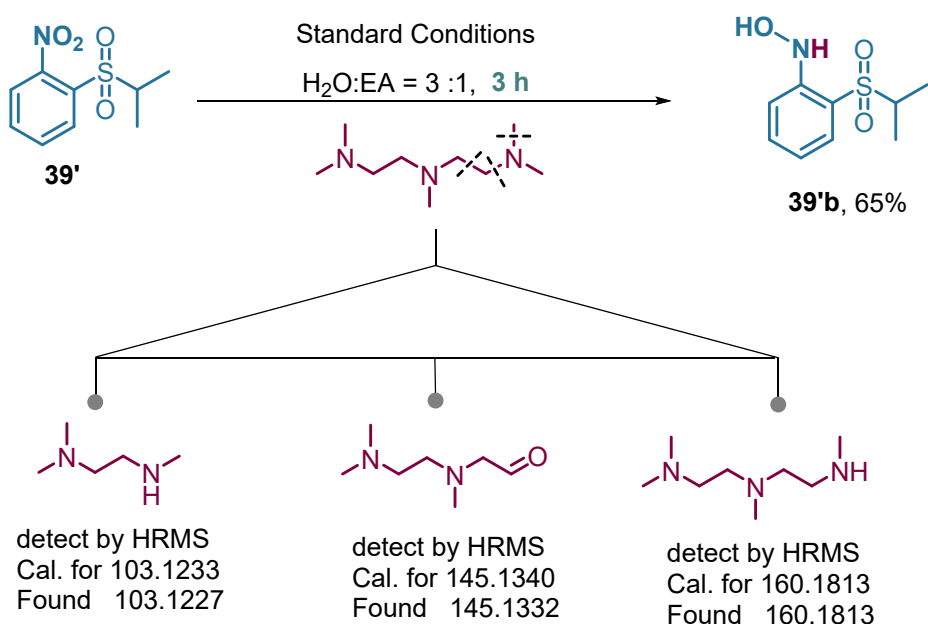

A 10 mL tube was charged with **39'** (0.2 mol), pentamethyldiethylenetriamine PMDETA (3.0 equivalent), glycine (1.0 equivalent) in mix solvent ( $\text{H}_2\text{O}:\text{EA}=3:1$ ) upon irradiation of 100 W 390 nm LEDs at room temperature under  $\text{N}_2$  atmosphere for 3 h. The reaction was monitored by TLC. After completion, the reaction mixture was quenched with water (10 mL) and extracted with dichloromethane for three times. The combined organic phase was dried over anhydrous  $\text{Na}_2\text{SO}_4$ , filtered, and evaporated to leave a residue, which was purified by silica gel column chromatography with petroleum ether/ ethyl acetate (from 10 :1) to give the pure desired product **39'b**.

Yellow solid,  $^1\text{H}$  NMR (400 MHz,  $\text{CDCl}_3$ )  $\delta$  8.52 (s, 1H), 7.68 (d,  $J = 7.6$  Hz, 1H), 7.54 (t,  $J = 8.0$  Hz, 1H), 7.46 (d,  $J = 8.4$  Hz, 1H), 6.98 (t,  $J = 7.6$  Hz, 1H), 5.96 (s, 1H), 3.40–3.33 (m, 1H), 2.16 (d,  $J = 7.2$  Hz, 6H).

HRMS (ESI-TOF)  $m/z$ :  $[\text{M} + \text{Na}]^+$  Calcd for  $\text{C}_9\text{H}_{13}\text{NO}_3\text{SNa}$  238.0514; Found: 238.0512.

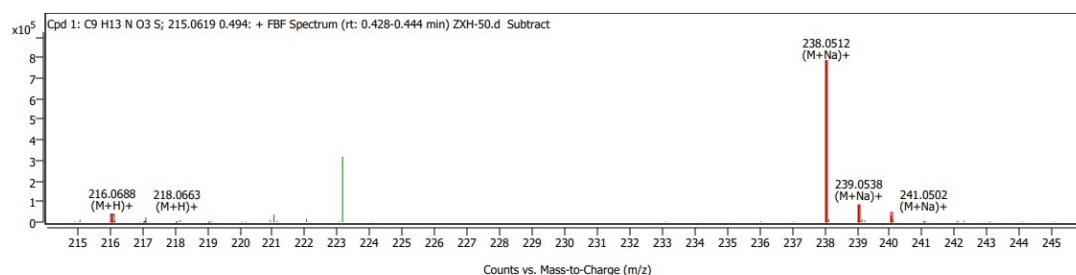

Compound ID Table

| Name | Formula                                       | Species                                             | RT    | RT Diff | Mass     | CAS | ID Source | Score | Score (Lib) | Score (Tgt) |
|------|-----------------------------------------------|-----------------------------------------------------|-------|---------|----------|-----|-----------|-------|-------------|-------------|
|      | $\text{C}_9\text{H}_{13}\text{N O}_3\text{S}$ | $(\text{M}+\text{H})^+$<br>$(\text{M}+\text{Na})^+$ | 0.494 |         | 215.0619 |     | FBF       | 99.14 |             | 99.14       |

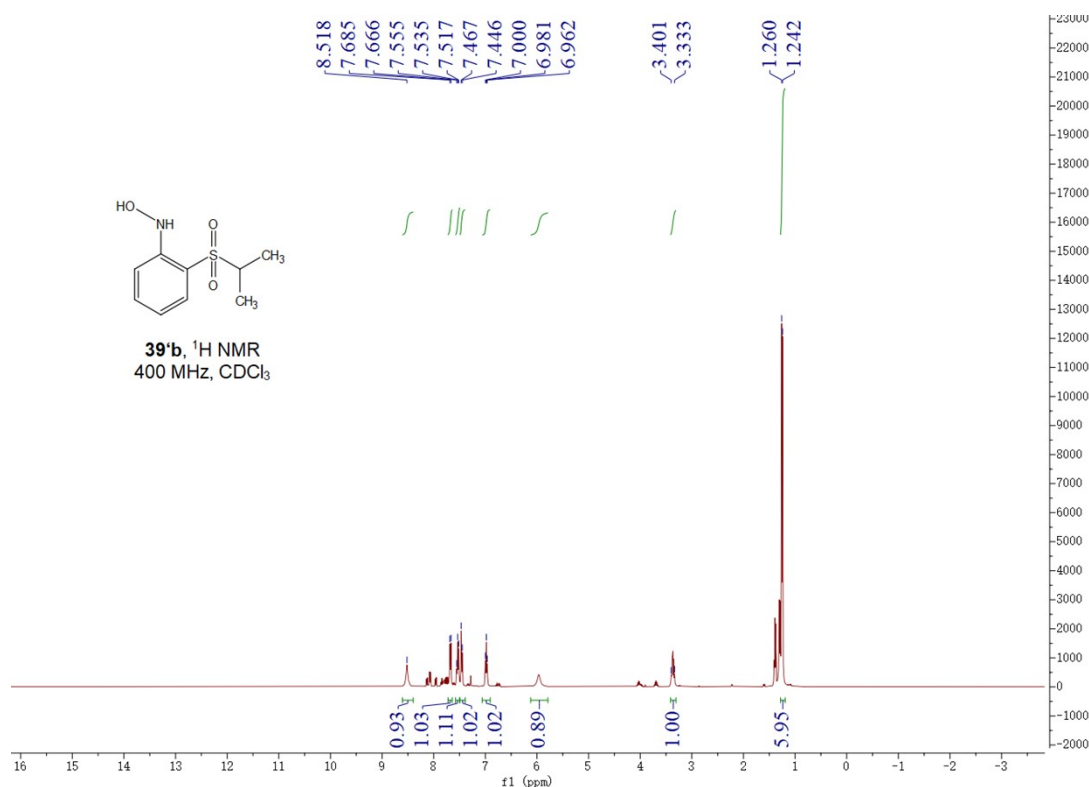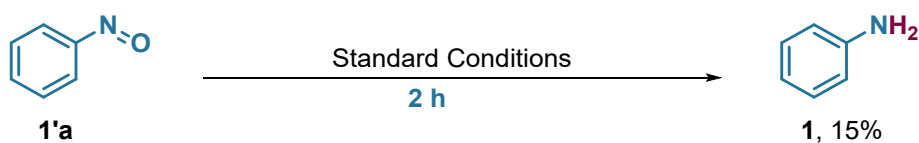

A 10 mL tube was charged with **1'a** (0.2 mol), pentamethyldiethylenetriamine PMDETA (3.0 equivalent), glycine (1.0 equivalent) in ( $\text{H}_2\text{O}$ : EA=3:1) upon irradiation of 100 W 390 nm LEDs at room temperature under  $\text{N}_2$  atmosphere for 2 h. The reaction was monitored by TLC. After completion, the reaction mixture was quenched with water (10 mL) and extracted with dichloromethane for three times. The combined organic phase was dried over anhydrous  $\text{Na}_2\text{SO}_4$ , filtered, and evaporated to leave a residue, which was purified by silica gel column chromatography with petroleum ether/ ethyl acetate (from 10 :1) to give the pure desired product **1**.

*The results indicate that hydroxylamine and nitrosoarene are potential intermediates.*

## (2) Triplet state quench experiment<sup>2-3</sup>

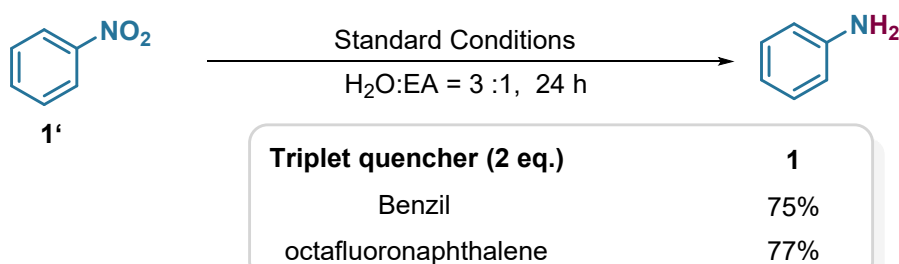

The triplet state quench experiments were conducted with nitrobenzene **1'**, PMDETA and glycine under the standard conditions using two different triplet quenchers (benzill, octafluoronaphthalene), respectively. However, these quenching studies did not reduce the reaction yield, indicating that the  $T_1$  excited state of nitrobenzene is not the active species for triggering reaction.

*The results rule out the possibility of nitroarene itself absorbing light to initiate the reaction.*

### (3) UV-vis experiment

UV-vis experiments were performed to analyse the potential association of PMDETA, glycine with electron acceptors (nitroarene, nitrosoarene, or hydroxylamine compounds).

(i) Various combinations of **8'**, PMDETA and glycine in DMF

- a) **8'** (1 mmol) was dissolved in DMF (5 mL).
- b) **8'** (1 mmol) and PMDETA (250  $\mu$ L) were dissolved in DMF (4.75 mL).
- c) **8'** (1 mmol) and glycine (250  $\mu$ L) were dissolved in DMF (4.75 mL).
- d) **8'** (1 mmol), PMDETA (250  $\mu$ L) and glycine (250  $\mu$ L) were dissolved in DMF (4.5 mL).

(ii) Various combinations of **1'a**, PMDETA and glycine in DMF

- e) **1'a** (1 mmol) was dissolved in DMF (5 mL)
- f) **1'a** (1 mmol) and PMDETA (250  $\mu$ L) were dissolved in DMF (4.75 mL)
- g) **1'a** (1 mmol) and glycine (250  $\mu$ L) were dissolved in DMF (4.75 mL)
- h) **1'a** (1 mmol), PMDETA (250  $\mu$ L) and glycine (250  $\mu$ L) were dissolved in DMF (4.5 mL)

(iii) Various combinations of **39'b**, PMDETA and glycine in DMF

- i) **39'b** (1 mmol) was dissolved in DMF (5 mL)
- j) **39'b** (1 mmol) and PMDETA (250  $\mu$ L) were dissolved in DMF (4.75 mL)
- k) **39'b** (1 mmol) and glycine (250  $\mu$ L) were dissolved in DMF (4.75 mL).
- l) **39'b** (1 mmol), PMDETA (250  $\mu$ L) and glycine (250  $\mu$ L) were dissolved in DMF (4.5 mL)
- m) PMDETA (250  $\mu$ L) and glycine (250  $\mu$ L) was dissolved in DMF (4.5 mL).
- n) PMDETA (250  $\mu$ L) was dissolved in DMF (4.75 mL)
- o) glycine (250  $\mu$ L) was dissolved in DMF (4.75 mL)

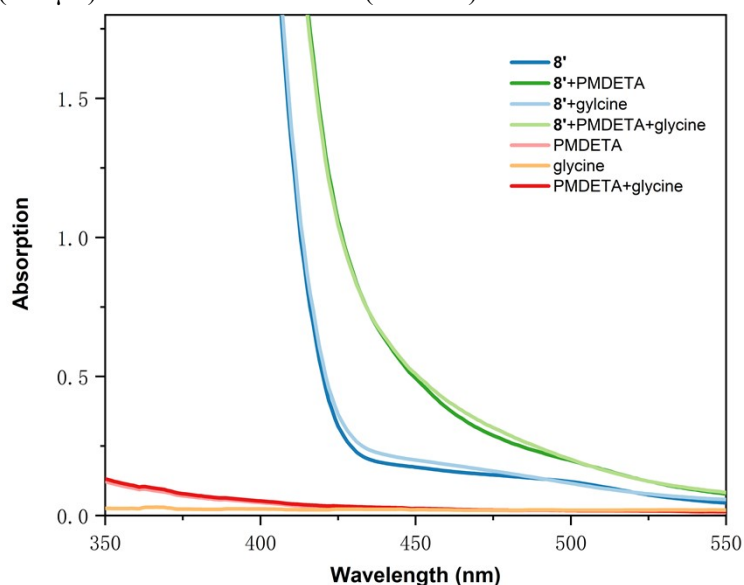

**Figure S1:** UV-vis spectra of various combinations of **8'**, PMDETA and glycine in DMF

The results revealed that PMDETA can associate with **8'** to form the EDA complex I, resulting a bathochromic shifted compared to the spectra of the individual components.

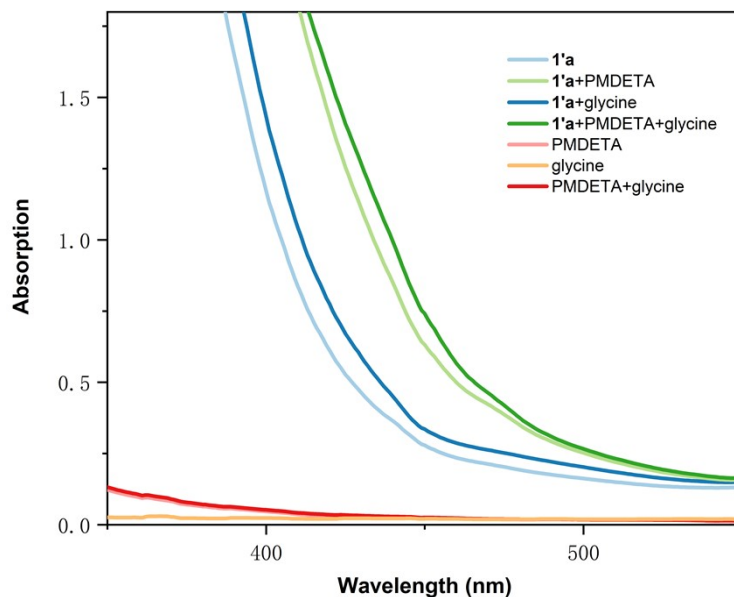

**Figure S2:** UV-vis spectra of various combinations of **1'a**, PMDETA and glycine in DMF

The results revealed that the addition of PMDETA resulted in a bathochromic shift in the absorbance of the nitroso compounds, with a slight modulation observed upon the addition of glycine. Based on these findings, it can be inferred that the formation of EDA complex II occurs between PMDETA and nitroso compounds.

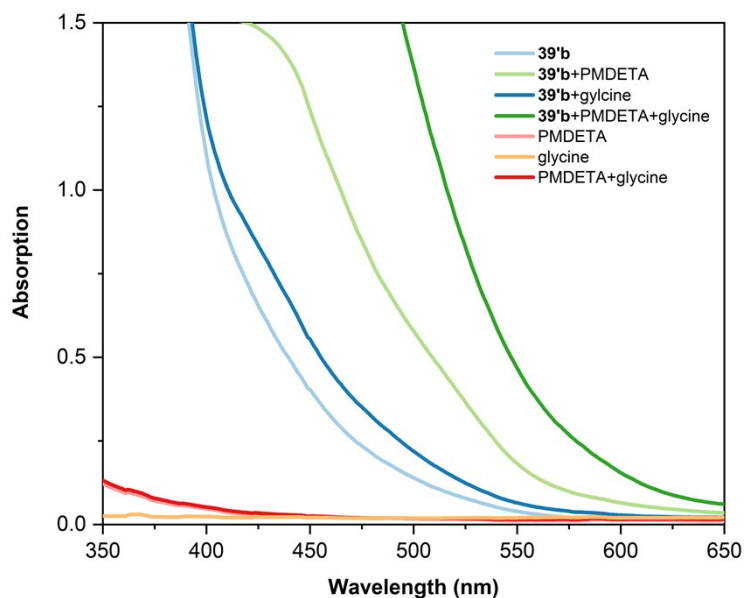

**Figure S3:** UV-vis spectra of various combinations of **39'b**, PMDETA and glycine in DMF

The results indicated that the absorbance of the hydroxylamine compounds underwent a bathochromic shift upon the introduction of PMDETA, while the addition of glycine further accentuated this red-shift. Based on these findings, it can be inferred that the

formation of EDA complex III occurs between PMDETA, glycine and hydroxylamine compounds.

#### (4) NMR titration<sup>4-5</sup>

The NMR sample of electron acceptors (**8'**, **1'a**, and **39'b**·glycine adduct) with different excesses of PMDETA in CDCl<sub>3</sub> or DMSO-*d*<sub>6</sub> was prepared.

(i) **EDA complex I: 8'** (0.25 M) with PMDETA (0.025 M to 0.075 M) in CDCl<sub>3</sub> (Figure S4).

(ii) **EDA complex II: 1'a** (0.25 M) with PMDETA (0.025 M to 0.075 M) in CDCl<sub>3</sub> (Figure S5).

(iii) **EDA complex III': 39'b** (0.25 M) with PMDETA (0.025 M to 0.075 M) in CDCl<sub>3</sub> (Figure S6).

(iv) **EDA complex III: 39'b**·glycine adduct (0.025 M) with PMDETA (0.025 M to 0.075 M) in DMSO-*d*<sub>6</sub> (Figure S7).

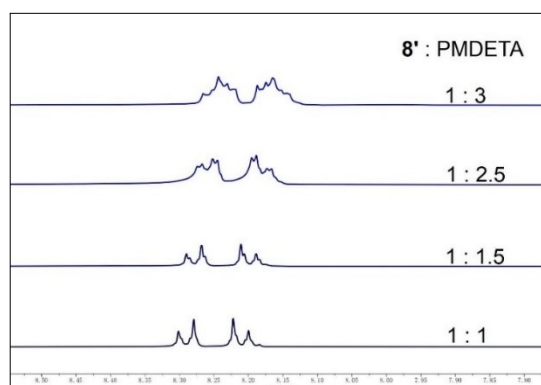

**Figure S4:** NMR titration of **8'** and PMDETA

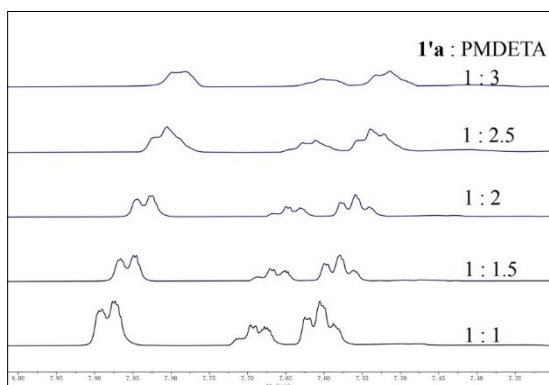

**Figure S5:** NMR titration of **1'a** and PMDETA

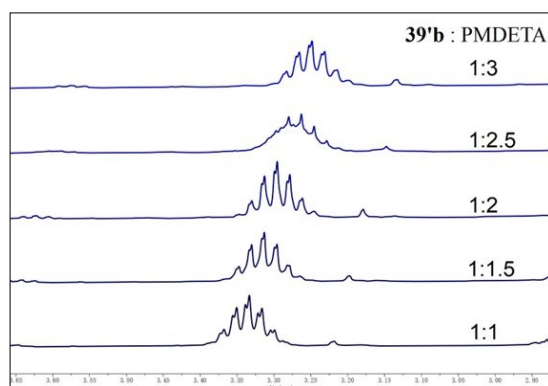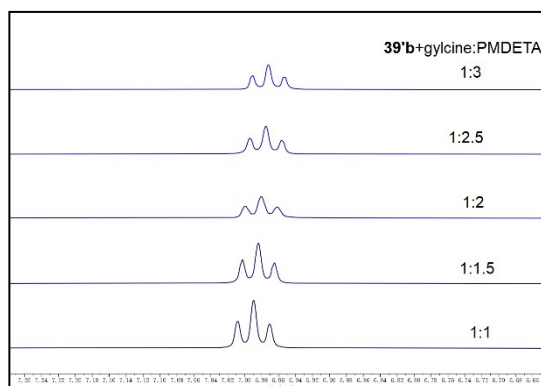

**Figure S6:** NMR titration of **39'b** and PMDETA**Figure S7:** NMR titration of **39'b**·glycine adduct and PMDETA

The change in chemical shift (in ppm) of each peak of electron acceptor was calculated by comparing the 0.25 M electron acceptor' solution. The association constants  $K_{\text{EDA}}$  were measured from the slope and intercept of the plots.

**Table S3:** Data obtained by  $^1\text{H}$  NMR spectra for EDA complex I in  $\text{CDCl}_3$ , with **8'** = 0.025 mol/L.

| [PMDETA](M) | 1/[PMDETA]( $\text{M}^{-1}$ ) | $\delta_0$ | $\delta_{\text{EDA-I}}$ | $\Delta\delta$ | 1/ $\Delta\delta$ |
|-------------|-------------------------------|------------|-------------------------|----------------|-------------------|
| 0.025       | 40                            | 8.326      | 8.302                   | 0.024          | 41.7              |
| 0.0375      | 26.7                          | 8.326      | 8.290                   | 0.036          | 27.8              |
| 0.0625      | 16                            | 8.326      | 8.274                   | 0.052          | 19.2              |
| 0.075       | 13.3                          | 8.326      | 8.266                   | 0.082          | 12.2              |

**Table S4:** Data obtained by  $^1\text{H}$  NMR spectra for EDA complex II in  $\text{CDCl}_3$ , with **1'a** = 0.025 mol/L.

| [PMDETA](M) | 1/[PMDETA]( $\text{M}^{-1}$ ) | $\delta_0$ | $\delta_{\text{EDA-II}}$ | $\Delta\delta$ | 1/ $\Delta\delta$ |
|-------------|-------------------------------|------------|--------------------------|----------------|-------------------|
| 0.025       | 40.0                          | 7.918      | 7.877                    | 0.041          | 24.4              |
| 0.0375      | 26.7                          | 7.918      | 7.850                    | 0.068          | 14.7              |
| 0.05        | 20.0                          | 7.918      | 7.829                    | 0.089          | 11.2              |
| 0.0625      | 16.0                          | 7.918      | 7.805                    | 0.113          | 8.4               |
| 0.075       | 13.3                          | 7.918      | 7.778                    | 0.140          | 7.1               |

**Table S5:** Data obtained by  $^1\text{H}$  NMR spectra for EDA complex III' in  $\text{CDCl}_3$ , with **39'b** = 0.025 mol/L.

| [PMDETA](M) | 1/[PMDETA]( $\text{M}^{-1}$ ) | $\delta_0$ | $\delta_{\text{EDA-III'}}$ | $\Delta\delta$ | 1/ $\Delta\delta$ |
|-------------|-------------------------------|------------|----------------------------|----------------|-------------------|
| 0.025       | 40.0                          | 7.918      | 7.877                      | 0.041          | 24.4              |
| 0.0375      | 26.7                          | 7.918      | 7.850                      | 0.068          | 14.7              |
| 0.05        | 20.0                          | 7.918      | 7.829                      | 0.089          | 11.2              |
| 0.0625      | 16.0                          | 7.918      | 7.805                      | 0.113          | 8.4               |
| 0.075       | 13.3                          | 7.918      | 7.778                      | 0.140          | 7.1               |

**Table S6:** Data obtained by  $^1\text{H}$  NMR spectra for EDA complex III in DMSO, with **39'b**·glycine adduct = 0.025 mol/L.

| [PMDETA](M) | 1/[PMDETA](M <sup>-1</sup> ) | $\delta_0$ | $\delta_{\text{EDA-III}}$ | $\Delta\delta$ | 1/ $\Delta\delta$ |
|-------------|------------------------------|------------|---------------------------|----------------|-------------------|
| 0.025       | 40.0                         | 7.001      | 9.9894                    | 0.0107         | 93.5              |
| 0.0375      | 26.7                         | 7.001      | 6.9840                    | 0.0161         | 62.1              |
| 0.05        | 20.0                         | 7.001      | 6.9804                    | 0.0197         | 50.8              |
| 0.0625      | 16.0                         | 7.001      | 6.9751                    | 0.250          | 40                |
| 0.075       | 13.3                         | 7.001      | 6.9721                    | 0.0280         | 35.7              |

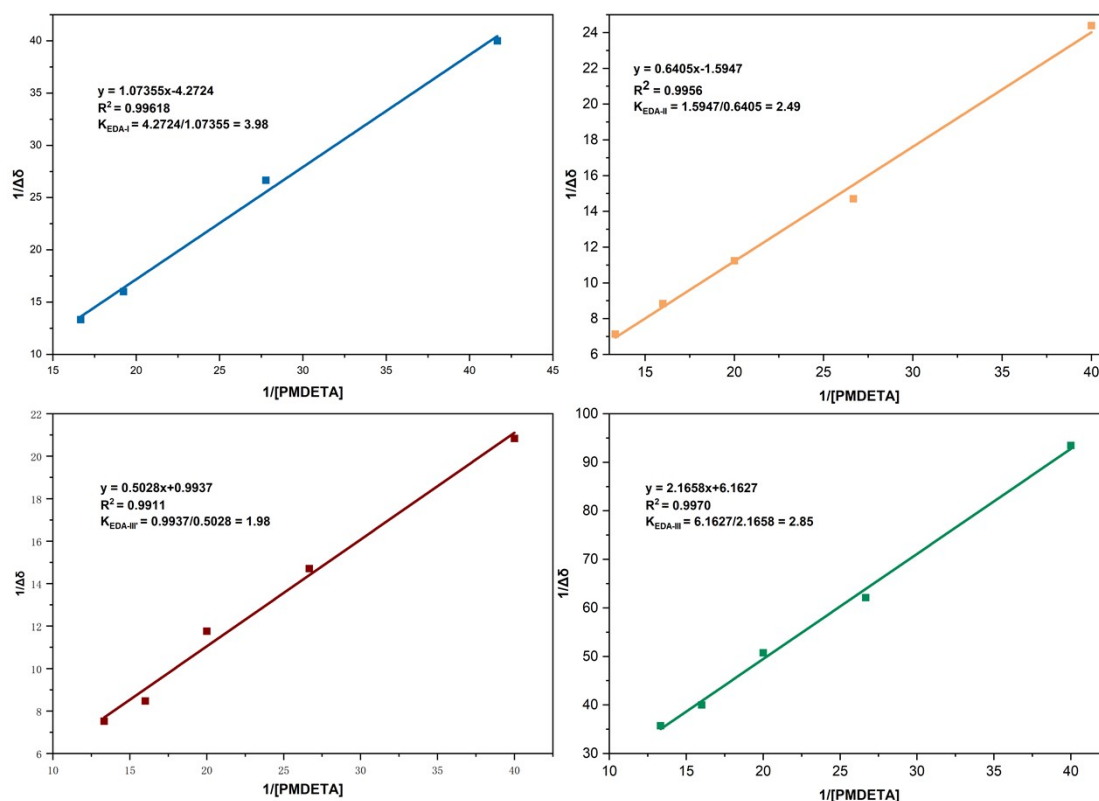

**Figure S8:** The association constants  $K_{\text{EDA}}$

The results indicated that the value of  $K$  were decrease progressively in the absence of glycine ( $K_{\text{EDA I}}=3.98 > K_{\text{EDA II}}=2.49 > K_{\text{EDA III}}=1.98$ ). Furthermore, the  $K_{\text{EDA-III}}$  was measured at 2.85, suggesting that glycine could enhance the ability of **39'b** to associate with PMDETA.



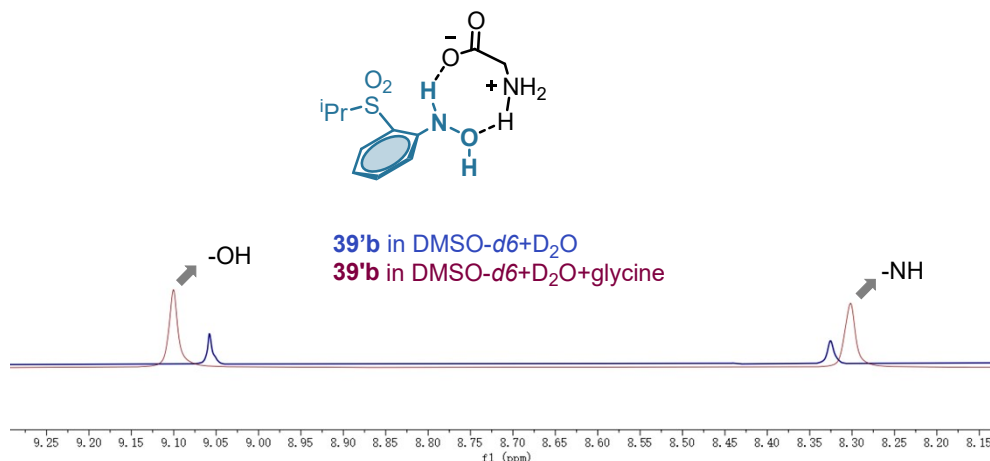

**Figure S9:**  $^1\text{H}$  NMR shift of **39'b** and glycine

Based on the effect of electron-cloud density in chemical shift of protons, the following conclusions can be draw:

(a) the downfield shift of -OH proton indicates a reduced electron-cloud density of hydrogen atom, which is caused by the lone pair of electrons of O (oxygen in the **39'b**) to be biased toward H of  $-\text{NH}_3^+$  to form the intermolecular hydrogen bonding between  $-\text{NH}_3^+$  of glycine and **39'b** (-OH).

(b) the upfield of -NH proton suggests an increased electron-cloud density of hydrogen atom, which is caused by the presence of intermolecular hydrogen bonding between  $-\text{COO}^-$  of glycine and **39'b** (-NH).

## (5) Preliminary kinetic investigation

(i) A 10 mL tube was charged with 1-(isopropylsulfonyl)-2-nitrobenzene **39'** (0.2 mol), pentamethyldiethylenetriamine PMDETA (3.0 equivalent) in  $\text{H}_2\text{O}$ : EA (150  $\mu\text{L}$ : 50  $\mu\text{L}$ ) upon irradiation of 100 W 390 nm LEDs at room temperature under  $\text{N}_2$  atmosphere. Five parallel reactions were respectively illuminated under 390 nm for different time 1 h, 3 h, 5 h, 10 h, 24 h. The yield of **39** was obtained by  $^1\text{H}$  NMR using 1,3,5-trimethoxybenzene (0.05 mmol) as an internal standard.

The results (blue lines) showed that in the absence of glycine, the **39'** was almost completely converted within 5 h, with 64.5% of **39'b** and 21.5% of **39** being formed, and thereafter the rate of conversion of **39'b** to **39** decreased dramatically, with only 36.5% of **39** being formed, accompanied by 55.5% of **39'b** remaining even after 24 h of reaction.

(ii) A 10 mL tube was charged with **39'** (0.2 mol), pentamethyldiethylenetriamine PMDETA (3.0 equivalent), glycine (1.0 equivalent) in  $\text{H}_2\text{O}$ : EA (150  $\mu\text{L}$ : 50  $\mu\text{L}$ ) upon irradiation of 100 W 390 nm LEDs at room temperature under  $\text{N}_2$  atmosphere. Five parallel reactions were respectively illuminated under 390 nm for different time 1 h, 3 h, 5 h, 10 h, 24 h. The yield of **39** was obtained by  $^1\text{H}$  NMR using 1,3,5-trimethoxybenzene (0.05 mmol) as an internal standard.

The results (orange lines) showed that upon addition of glycine, the **39'** was almost completely converted within 3 h, with 82% of **39'b** and 8% of **39** being formed, and the

yield of **39** after 24 hours of reaction was 78%, accompanied by 12% **39'b** remaining.

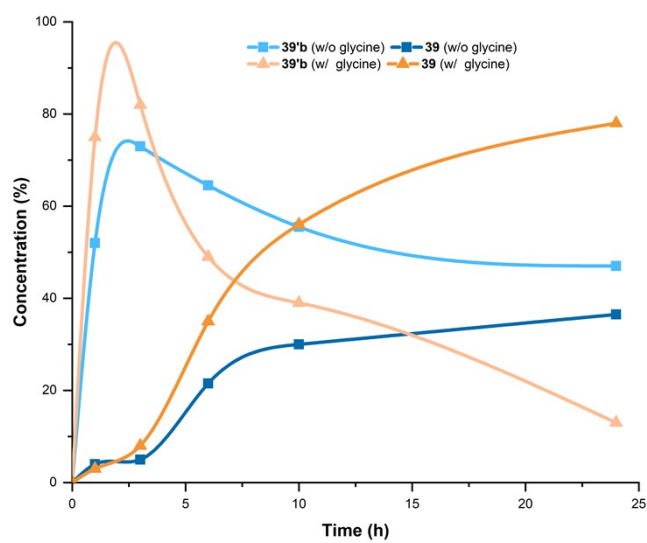

Figure S10:  $^1\text{H}$  NMR of reaction solution

**V. Characterization data for the products (reactions was conducted at 0.2 mmol scale).**

***N*-phenylacetamide (1a)**

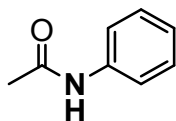

Purified by column chromatography using the mixture of petroleum ether and ethyl acetate (PE/EA = 5:1) as eluant, white solid (81% yield, 21.9 mg).

**<sup>1</sup>H NMR** (400 MHz, CDCl<sub>3</sub>) δ 8.17 (s, 1H), 7.53 (d, *J* = 8.2 Hz, 2H), 7.31 (t, *J* = 7.6 Hz, 2H), 7.11 (t, *J* = 7.4 Hz, 1H), 2.16 (s, 3H).

**<sup>13</sup>C NMR** (100 MHz, CDCl<sub>3</sub>) δ 169.1, 138.1, 128.9, 124.3, 120.2, 24.4.

(Known compound: *ACS Sustainable Chem. Eng.*, 2023, **11**, 9047-9056.).

***N*-(*p*-tolyl)acetamide (2a)**

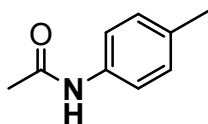

Purified by column chromatography using the mixture of petroleum ether and ethyl acetate (PE/EA = 5:1) as eluant, white solid (88% yield, 26.2 mg).

**<sup>1</sup>H NMR** (400 MHz, CDCl<sub>3</sub>) δ 7.63 (s, 1H), 7.39 (d, *J* = 8.2 Hz, 2H), 7.11 (t, *J* = 8.1 Hz, 2H), 2.32 (s, 3H), 2.16 (s, 3H).

**<sup>13</sup>C NMR** (100 MHz, CDCl<sub>3</sub>) δ 168.6, 135.4, 133.9, 129.4, 120.2, 24.4, 20.9.

(Known compound: *ACS Sustainable Chem. Eng.*, 2023, **11**, 9047-9056.).

***N*-(4-ethylphenyl)acetamide (3a)**

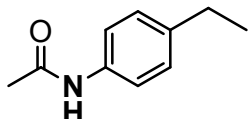

Purified by column chromatography using the mixture of petroleum ether and ethyl acetate (PE/EA = 5:1) as eluant, white solid (86% yield, 28.1 mg).

**<sup>1</sup>H NMR** (400 MHz, CDCl<sub>3</sub>) δ 7.46-7.41 (m, 3H), 7.15 (d, *J* = 8.2 Hz, 2H), 2.62 (q, *J* = 7.6 Hz, 2H), 2.17 (s, 3H), 1.23 (t, *J* = 7.6 Hz, 3H).

**<sup>13</sup>C NMR** (100 MHz, CDCl<sub>3</sub>) δ 168.4, 140.4, 135.5, 128.3, 120.2, 28.3, 24.6, 15.6.

(Known compound: *ChemSusChem* 2022, **15**, e202200227.)

**4-acetamidobenzyl acetate (4a)**

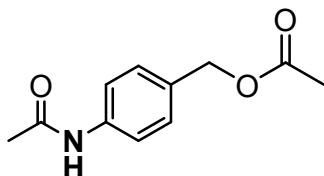

Purified by column chromatography using the mixture of petroleum ether and ethyl acetate (PE/EA = 5:1) as eluant, white solid (85% yield, 35.2 mg).

**<sup>1</sup>H NMR** (400 MHz, CDCl<sub>3</sub>) δ 7.55-7.51 (m, 3H), 7.32 (d, *J* = 8.3 Hz, 2H), 5.07 (s, 2H), 2.19 (s, 3H), 2.11 (s, 3H).

**<sup>13</sup>C NMR** (100 MHz, CDCl<sub>3</sub>) δ 171.0, 168.5, 138.0, 131.7, 129.2, 119.9, 65.9, 24.6, 21.0.

(Known compound: *Eur. J. Org. Chem.*, 2012, **2012**, 6127-6131.)

***N,N'*-(1,4-phenylene)diacetamide (5a)**

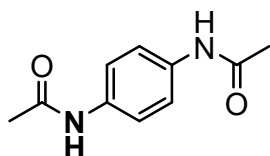

Purified by column chromatography using the mixture of petroleum ether and ethyl acetate (PE/EA = 5:1) as eluant, white solid (36% yield, 13.8 mg).

**<sup>1</sup>H NMR** (400 MHz, DMSO-*d*<sub>6</sub>) δ 9.86 (d, *J* = 16.4 Hz, 2H), 7.50 (d, *J* = 16.8 Hz, 4H), 2.05-2.01 (m, 6H).

**<sup>13</sup>C NMR** (100 MHz, DMSO-*d*<sub>6</sub>) δ 168.4, 135.1, 119.8, 24.3.

**HRMS** (ESI-TOF) *m/z*: [M+H]<sup>+</sup> Calcd for C<sub>10</sub>H<sub>13</sub>N<sub>2</sub>O<sub>2</sub> 193.0977, Found: 193.0974.

***N*-(4-fluorophenyl)acetamide (6a)**

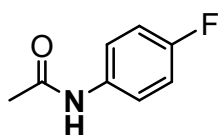

Purified by column chromatography using the mixture of petroleum ether and ethyl acetate (PE/EA = 5:1) as eluant, white solid (80% yield, 24.5 mg).

**<sup>1</sup>H NMR** (400 MHz, CDCl<sub>3</sub>) δ 7.55 (s, 1H), 7.48 (dd, *J* = 9.0 Hz, *J* = 4.8 Hz, 2H), 7.01 (t, *J* = 8.6 Hz, 2H), 2.18 (s, 3H).

**<sup>13</sup>C NMR** (100 MHz, CDCl<sub>3</sub>) δ 168.6, 159.4 (d, *J*<sub>F-C</sub> = 242.1 Hz), 133.87, 121.9 (d, *J*<sub>F-C</sub> = 7.4 Hz), 115.6 (d, *J*<sub>F-C</sub> = 22.3 Hz), 24.4.

**<sup>19</sup>F NMR** (376 MHz, CDCl<sub>3</sub>) δ -118.0

(Known compound: *Angew. Chem. Int. Ed.*, 2021, **60**, 7936-7940.)

***N*-(4-chlorophenyl)acetamide (7a)**

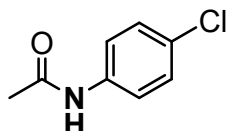

Purified by column chromatography using the mixture of petroleum ether and ethyl acetate (PE/EA = 5:1) as eluant, white solid (81% yield, 27.4 mg).

**<sup>1</sup>H NMR** (400 MHz, CDCl<sub>3</sub>) δ 7.47 (d, *J* = 8.7 Hz, 2H), 7.46-7.31 (m, 3H), 2.19 (s, 3H).

**<sup>13</sup>C NMR** (100 MHz, CDCl<sub>3</sub>) δ 168.3, 136.4, 129.3, 129.0, 121.1, 24.6.

(Known compound: *J. Am. Chem. Soc.*, 2022, **144**, 15437-15442.)

***N*-(4-acetylphenyl)acetamide (8a)**

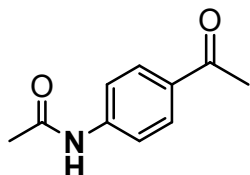

Purified by column chromatography using the mixture of petroleum ether and ethyl acetate (PE/EA = 5:1) as eluant, white solid (81% yield, 28.9 mg).

**<sup>1</sup>H NMR** (400 MHz, CDCl<sub>3</sub>) δ 7.95 (d, *J* = 8.0 Hz, 2H), 7.86 (s, 1H), 7.65 (d, *J* = 8.4 Hz, 2H), 2.59 (s, 3H), 2.24 (s, 3H).

**<sup>13</sup>C NMR** (100 MHz, CDCl<sub>3</sub>) δ 197.2, 168.8, 142.4, 132.8, 129.8, 118.9, 26.5, 24.8.

(Known compound: *J. Am. Chem. Soc.*, 2022, **144**, 15437-15442.)

***N*-(4-benzoylphenyl)acetamide (9a)**

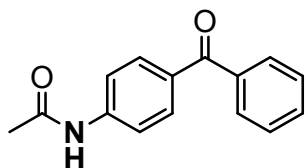

Purified by column chromatography using the mixture of petroleum ether and ethyl acetate (PE/EA = 5:1) as eluant, white solid (79% yield, 37.8 mg).

**<sup>1</sup>H NMR** (400 MHz, CDCl<sub>3</sub>) δ 8.07 (s, 1H), 7.83-7.77 (m, 4H), 7.67 (d, *J* = 8.0 Hz, 2H), 7.60 (t, *J* = 7.2 Hz, 1H), 7.49 (t, *J* = 7.2 Hz, 2H), 2.23 (s, 3H).

**<sup>13</sup>C NMR** (100 MHz, CDCl<sub>3</sub>) δ 195.8, 168.8, 142.1, 137.8, 132.9, 132.3, 131.6, 129.8, 128.3, 118.8, 24.7.

**HRMS** (ESI-TOF) *m/z*: [M+H]<sup>+</sup> Calcd for C<sub>15</sub>H<sub>14</sub>NO<sub>2</sub> 240.1028, Found: 240.1025.

***N*-(4-cyanophenyl)acetamide (10a)**

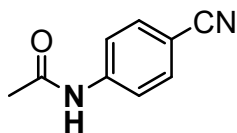

Purified by column chromatography using the mixture of petroleum ether and ethyl acetate (PE/EA = 5:1) as eluant, white solid (81% yield, 25.9 mg).

**<sup>1</sup>H NMR** (400 MHz, DMSO-*d*<sub>6</sub>) δ 10.37 (s, 1H), 7.77-7.72 (m, 4H), 2.09 (s, 3H).

**<sup>13</sup>C NMR** (100 MHz, DMSO-*d*<sub>6</sub>) δ 169.6, 143.9, 133.7, 119.5, 119.4, 105.1, 24.7.

(Known compound: *ACS Sustainable Chem. Eng.*, 2023, **11**, 9047-9056.).

**methyl 4-acetamidobenzoate (11a)**

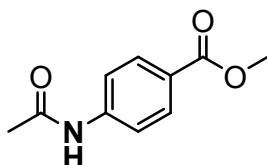

Purified by column chromatography using the mixture of petroleum ether and ethyl acetate (PE/EA = 5:1) as eluant, white solid (83% yield, 32.1 mg).

**<sup>1</sup>H NMR** (400 MHz, CDCl<sub>3</sub>) δ 8.02-8.00 (m, 2H), 7.67 (s, 1H), 7.61 (d, *J* = 8.4 Hz, 2H), 3.92 (s, 3H), 2.22 (s, 3H).

**<sup>13</sup>C NMR** (100 MHz, CDCl<sub>3</sub>) δ 168.7, 166.7, 142.2, 130.8, 125.5, 118.8, 52.1, 24.8.

**HRMS** (ESI-TOF) *m/z*: [M+H]<sup>+</sup> Calcd for C<sub>10</sub>H<sub>12</sub>NO<sub>3</sub> 194.0819, Found: 194.0814.

***N*-(4-formylphenyl)acetamide (12a)**

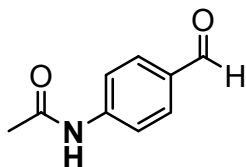

Purified by column chromatography using the mixture of petroleum ether and ethyl acetate (PE/EA = 5:1) as eluant, white solid (79% yield, 25.8 mg).

**<sup>1</sup>H NMR** (400 MHz, CDCl<sub>3</sub>) δ 9.93 (s, 1H), 8.01 (s, 1H), 7.86 (d, *J* = 8.8 Hz, 2H), 7.74 (d, *J* = 8.4 Hz, 2H), 2.25 (s, 3H).

**<sup>13</sup>C NMR** (100 MHz, CDCl<sub>3</sub>) δ 191.2, 169.0, 143.7, 132.2, 131.2, 119.3, 24.8.

(Known compound: *Angew. Chem. Int. Ed.*, 2021, **60**, 7935-7940.)

***N*-(4-vinylphenyl)acetamide (13a)**

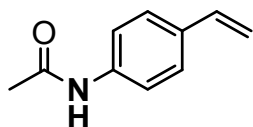

Purified by column chromatography using the mixture of petroleum ether and ethyl acetate (PE/EA = 5:1) as eluant, white solid (80% yield, 25.8 mg).

**<sup>1</sup>H NMR** (400 MHz, CDCl<sub>3</sub>) δ 7.63 (s, 1H), 7.49 (d, *J* = 8.4 Hz, 2H), 7.37 (d, *J* = 8.4 Hz, 2H), 6.68 (dd, *J* = 17.6 Hz, *J* = 7.8 Hz, 1H), 6.70 (d, *J* = 17.6 Hz, 1H), 5.21 (d, *J* = 10.8 Hz, 1H), 2.19 (s, 3H).

**<sup>13</sup>C NMR** (100 MHz, CDCl<sub>3</sub>) δ 168.4, 137.5, 136.1, 133.7, 126.8, 119.8, 113.1, 24.6.

**HRMS** (ESI-TOF) *m/z*: [M+H]<sup>+</sup> Calcd for C<sub>10</sub>H<sub>12</sub>NO 160.0921, Found: 160.0915.

***(E)*-N-(4-styrylphenyl)acetamide (14a)**

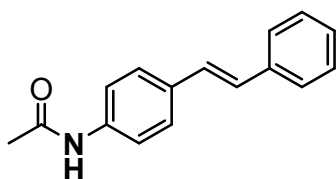

Purified by column chromatography using the mixture of petroleum ether and ethyl acetate (PE/EA = 5:1) as eluant, white solid (82% yield, 38.9 mg).

**<sup>1</sup>H NMR** (400 MHz, CDCl<sub>3</sub>) δ 7.60 (s, 1H), 7.39 (d, *J* = 8.0 Hz, 2H), 7.27-7.21 (m, 7H), 6.61-6.53 (m, 2H), 2.18 (s, 3H).

**<sup>13</sup>C NMR** (100 MHz, CDCl<sub>3</sub>) δ 168.4, 137.3, 136.8, 133.2, 129.9, 129.6, 129.6, 128.8, 128.3, 127.1, 119.5, 24.6

**HRMS** (ESI-TOF) *m/z*: [M+H]<sup>+</sup> Calcd for C<sub>16</sub>H<sub>16</sub>NO 238.1232, Found: 238.1230.

**ethyl 1-(4-acetamidophenyl)-5-(trifluoromethyl)-1H-pyrazole-4-carboxylate (15a)**

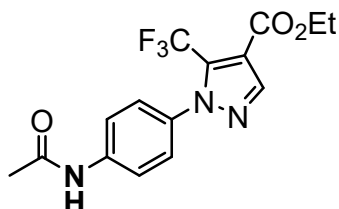

Purified by column chromatography using the mixture of petroleum ether and ethyl acetate (PE/EA = 5:1) as eluant, white solid (71% yield, 48.4 mg).

**<sup>1</sup>H NMR** (400 MHz, CDCl<sub>3</sub>) δ 8.12 (s, 1H), 7.68 (d, *J* = 8.7 Hz, 2H), 7.53 (s, 1H), 7.38 (d, *J* = 8.7 Hz, 2H), 4.39 (q, *J* = 7.2 Hz, 2H), 2.24 (s, 3H), 1.40 (d, *J* = 7.2 Hz, 3H).

**<sup>13</sup>C NMR** (100 MHz, CDCl<sub>3</sub>) δ 168.8 (d, *J*<sub>F-C</sub> = 8.5 Hz), 161.8, 142.4, 139.5 (d, *J*<sub>F-C</sub> = 4.4 Hz), 134.8, 132.6 (q, *J*<sub>F-C</sub> = 39.8 Hz), 126.5, 119.8 (d, *J*<sub>F-C</sub> = 2.5 Hz), 119.1 (q, *J*<sub>F-C</sub> = 269.9 Hz), 116.6, 61.4, 24.6, 14.10.

**<sup>19</sup>F NMR** (376 MHz, CDCl<sub>3</sub>) δ -55.42

**HRMS** (ESI-TOF) *m/z*: [M+H]<sup>+</sup> Calcd for C<sub>15</sub>H<sub>15</sub>F<sub>3</sub>N<sub>3</sub>O<sub>3</sub> 342.1065, Found: 342.1069.

***N*-(3-fluorophenyl)acetamide (16a)**

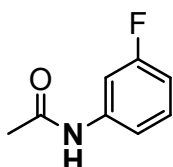

Purified by column chromatography using the mixture of petroleum ether and ethyl acetate (PE/EA = 5:1) as eluant, white solid (83% yield, 25.4 mg).

**<sup>1</sup>H NMR** (400 MHz, CDCl<sub>3</sub>) δ 7.69 (s, 1H), 7.50 (d, *J* = 7.2 Hz, 1H), 7.29-7.23 (s, 1H), 7.15 (d, *J* = 8.4 Hz, 1H), 6.81 (t, *J* = 8.4 Hz, 1H), 2.20 (s, 3H).

**<sup>13</sup>C NMR** (100 MHz, CDCl<sub>3</sub>) δ 168.8, 162.9 (d, *J*<sub>F-C</sub> = 243.2 Hz), 139.4 (d, *J*<sub>F-C</sub> = 10.8 Hz), 130.0 (d, *J*<sub>F-C</sub> = 9.3 Hz), 115.0 (d, *J*<sub>F-C</sub> = 2.8 Hz), 110.9 (d, *J*<sub>F-C</sub> = 21.2 Hz), 107.4 (d, *J*<sub>F-C</sub> = 26.1 Hz), 24.6.

**<sup>19</sup>F NMR** (376 MHz, CDCl<sub>3</sub>) δ -111.52.

(Known compound: *Angew. Chem. Int. Ed.*, 2021, **60**, 7935-7940.)

***N*-(3-bromophenyl)acetamide (17a)**

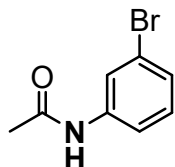

Purified by column chromatography using the mixture of petroleum ether and ethyl acetate (PE/EA = 5:1) as eluant, white solid (85% yield, 36.2 mg).

**<sup>1</sup>H NMR** (400 MHz, CDCl<sub>3</sub>) δ 8.17 (s, 1H), 7.79 (s, 1H), 7.41 (d, *J* = 7.9 Hz, 1H), 7.22 (d, *J* = 8.0 Hz, 1H), 7.16 (t, *J* = 8.0 Hz, 1H), 2.18 (s, 3H).

**<sup>13</sup>C NMR** (100 MHz, CDCl<sub>3</sub>) δ 169.1, 139.3, 130.2, 127.3, 123.0, 122.5, 118.5, 24.5.

**HRMS** (ESI-TOF) *m/z*: [M+H]<sup>+</sup> Calcd for C<sub>8</sub>H<sub>9</sub>BrNO 213.9868, Found: 213.9862.

***N*-(3-sulfamoylphenyl)acetamide (18a)**

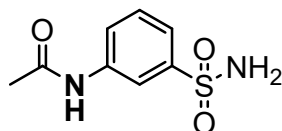

Purified by column chromatography using the mixture of petroleum ether and ethyl acetate (PE/EA = 5:1) as eluant, white solid (51% yield, 21.8 mg).

**<sup>1</sup>H NMR** (400 MHz, DMSO-*d*<sub>6</sub>) δ 10.24 (s, 1H), 8.15 (s, 1H), 7.75-7.70 (m, 1H), 7.49-7.48 (m, 2H), 7.35 (s, 2H), 2.07 (s, 3H).

**<sup>13</sup>C NMR** (100 MHz, DMSO-*d*<sub>6</sub>) δ 169.2, 145.0, 140.1, 129.9, 122.2, 120.5, 116.4, 24.5.

**HRMS** (ESI) *m/z*: [M + H]<sup>+</sup> Calcd for C<sub>8</sub>H<sub>11</sub>N<sub>2</sub>O<sub>3</sub>S 215.049; Found: 215.0501.

***N*-(3-cyanophenyl)acetamide (19a)**

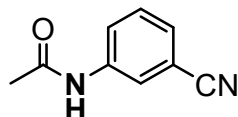

Purified by column chromatography using the mixture of petroleum ether and ethyl acetate (PE/EA = 5:1) as eluant, white solid (67% yield, 21.4 mg)

**<sup>1</sup>H NMR** (400 MHz, CDCl<sub>3</sub>) δ 8.11 (s, 1H), 7.97 (s, 1H), 7.74 (d, *J* = 8.0 Hz, 1H), 7.45-7.38 (m, 2H), 2.22 (s, 3H).

**<sup>13</sup>C NMR** (100 MHz, CDCl<sub>3</sub>) δ 169.2, 139.0, 130.0, 127.6, 124.0, 123.0, 118.7, 112.7, 24.5.

**HRMS** (ESI-TOF) *m/z*: [M+H]<sup>+</sup> Calcd for C<sub>9</sub>H<sub>9</sub>N<sub>2</sub>O 161.0715, Found: 161.0708.

***N,N'*-(1,3-phenylene)diacetamide (20a)**

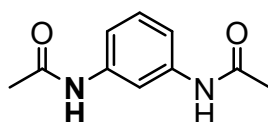

Purified by column chromatography using the mixture of petroleum ether and ethyl acetate (PE/EA = 5:1) as eluant, white solid (74% yield, 28.4 mg).

**<sup>1</sup>H NMR** (400 MHz, DMSO-*d*<sub>6</sub>) δ 9.89 (s, 2H), 7.87 (s, 1H), 7.27-7.25 (m, 2H), 7.19-7.15 (m, 1H), 2.03 (s, 6H).

**<sup>13</sup>C NMR** (100 MHz, DMSO-*d*<sub>6</sub>) δ 168.7, 140.0, 129.2, 114.3, 110.2, 24.5.

(Known compound: *Org. Chem. Front.*, 2022, **9**, 311-319.)

***N*-(*o*-tolyl)acetamide (21a)**

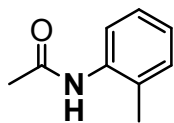

Purified by column chromatography using the mixture of petroleum ether and ethyl acetate (PE/EA = 5:1) as eluant, white solid (82% yield, 24.4 mg).

**<sup>1</sup>H NMR** (400 MHz, CDCl<sub>3</sub>) δ 7.72 (s, 1H), 7.23-7.19 (m, 3H), 7.10 (t, *J* = 7.2 Hz, 1H), 2.26 (s, 3H), 2.20 (s, 3H).

**<sup>13</sup>C NMR** (100 MHz, CDCl<sub>3</sub>) δ 168.6, 135.6, 130.5, 126.7, 125.4, 123.7, 123.7, 24.2, 17.8.

(Known compound: *ACS Sustainable Chem. Eng.*, 2023, **11**, 9047-9056.).

***N*-(2,3-dimethylphenyl)acetamide (22a)**

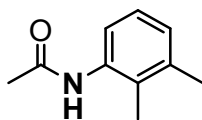

Purified by column chromatography using the mixture of petroleum ether and ethyl acetate (PE/EA = 5:1) as eluant, white solid (79% yield, 25.8mg).

**<sup>1</sup>H NMR** (400 MHz, CDCl<sub>3</sub>) δ 7.41 (d, *J* = 7.8 Hz, 1H), 7.15-7.09 (m, 2H), 7.03 (d, *J* = 7.4 Hz, 1H), 2.31 (s, 3H), 2.21 (s, 3H), 2.15 (s, 3H).

**<sup>13</sup>C NMR** (100 MHz, CDCl<sub>3</sub>) δ 168.7, 137.5, 135.2, 129.9, 127.7, 125.9, 122.7, 24.0, 20.6, 13.9.

**HRMS** (ESI-TOF) *m/z*: [M + H]<sup>+</sup> Calcd for C<sub>10</sub>H<sub>14</sub>NO 164.1075; Found: 164.1069.

***N*-(2,4-dimethylphenyl)acetamide (23a)**

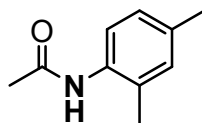

Purified by column chromatography using the mixture of petroleum ether and ethyl acetate (PE/EA = 5:1) as eluant, white solid (80% yield, 26.1 mg)

**<sup>1</sup>H NMR** (400 MHz, CDCl<sub>3</sub>) δ 7.53-7.51 (m, 1H), 7.10-7.02 (m, 3H), 2.30 (s, 3H), 2.22 (s, 3H), 2.19 (s, 3H).

**<sup>13</sup>C NMR** (100 MHz, CDCl<sub>3</sub>) δ 168.7, 135.3, 132.9, 131.2, 130.3, 127.2, 124.1, 24.0, 20.9, 17.8.

**HRMS** (ESI-TOF) *m/z*: [M + H]<sup>+</sup> Calcd for C<sub>10</sub>H<sub>14</sub>NO 164.1075; Found: 164.1070.

***N*-(2,6-dimethylphenyl)acetamide (24a)**

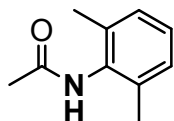

Purified by column chromatography using the mixture of petroleum ether and ethyl acetate (PE/EA = 5:1) as eluant, white solid (82% yield, 26.7 mg).

**<sup>1</sup>H NMR** (400 MHz, DMSO-*d*<sub>6</sub>) δ 9.23 (s, 1H), 7.06 (s, 3H), 2.14 (s, 6H), 2.05 (s, 3H).

**<sup>13</sup>C NMR** (100 MHz, DMSO *d*<sub>6</sub>) δ 168.2, 135.9, 135.6, 128.0, 126.7, 23.0, 18.6.

**HRMS** (ESI-TOF) *m/z*: [M + H]<sup>+</sup> Calcd for C<sub>10</sub>H<sub>14</sub>NO 164.1075; Found: 164.1071.

***N*-(3,4-dimethylphenyl)acetamide (25a)**

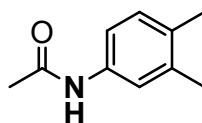

Purified by column chromatography using the mixture of petroleum ether and ethyl acetate (PE/EA = 5:1) as eluant, white solid (90% yield, 29.4 mg).

**<sup>1</sup>H NMR** (400 MHz, CDCl<sub>3</sub>) δ 7.55 (s, 1H), 7.30 (s, 1H), 7.23 (d, *J* = 8.0 Hz, 1H), 7.07 (d, *J* = 8.0 Hz, 1H), 2.24 (s, 3H), 2.23 (s, 3H), 2.16 (s, 3H).



$^{13}\text{C}$  NMR (100 MHz,  $\text{CDCl}_3$ )  $\delta$  168.4, 137.2, 135.6, 132.7, 129.9, 121.5, 117.6, 24.5, 19.9, 19.2.

HRMS (ESI-TOF)  $m/z$ :  $[\text{M} + \text{H}]^+$  Calcd for  $\text{C}_{10}\text{H}_{14}\text{NO}$  164.1075; Found: 164.1068.

***N*-(2-fluoro-5-methylphenyl)acetamide (26a)**

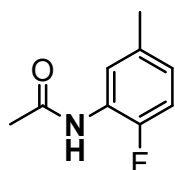

Purified by column chromatography using the mixture of petroleum ether and ethyl acetate (PE/EA = 5:1) as eluant, white solid (68% yield, 22.7 mg).

$^1\text{H}$  NMR (400 MHz,  $\text{CDCl}_3$ )  $\delta$  8.12 (d,  $J = 7.4$  Hz, 1H), 7.41 (s, 1H), 6.96 (dd,  $J = 10.6$  Hz,  $J = 8.4$  Hz, 1H), 6.86-6.83 (m, 1H), 2.33 (s, 3H), 2.23 (s, 3H).

$^{13}\text{C}$  NMR (100 MHz,  $\text{CDCl}_3$ )  $\delta$  168.4, 150.6 (d,  $J_{\text{F-C}} = 238.7$  Hz), , 134.2 (d,  $J_{\text{F-C}} = 3.6$  Hz), 125.8 (d,  $J_{\text{F-C}} = 10.5$  Hz), 124.6 (d,  $J_{\text{F-C}} = 7.3$  Hz), 122.2, 114.2 (d,  $J_{\text{F-C}} = 19.1$  Hz), 24.7, 21.1.

$^{19}\text{F}$  NMR (376 MHz,  $\text{CDCl}_3$ )  $\delta$  -136.19.

HRMS (ESI-TOF)  $m/z$ :  $[\text{M} + \text{H}]^+$  Calcd for  $\text{C}_9\text{H}_{11}\text{FNO}$  168.0824; Found: 168.0817.

***N*-(3,5-dichlorophenyl)acetamide (27a)**

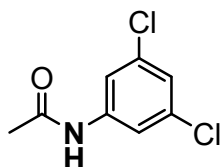

Purified by column chromatography using the mixture of petroleum ether and ethyl acetate (PE/EA = 5:1) as eluant, white solid (79% yield, 32.1 mg).

$^1\text{H}$  NMR (400 MHz,  $\text{MeOH-}d_4$ )  $\delta$  7.60 (s, 2H), 7.14-7.13 (m, 1H), 2.14 (s, 3H).

$^{13}\text{C}$  NMR (100 MHz,  $\text{MeOH-}d_4$ )  $\delta$  174.4, 144.8, 138.7, 126.9, 121.4, 26.5.

HRMS (ESI)  $m/z$ :  $[\text{M} + \text{H}]^+$  Calcd for  $\text{C}_8\text{H}_8\text{Cl}_2\text{NO}$  203.9983; Found: 203.9977.

***N*-(3,4,5-trichlorophenyl)acetamide (28a)**

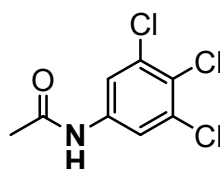

Purified by column chromatography using the mixture of petroleum ether and ethyl acetate (PE/EA = 5:1) as eluant, white solid (80% yield, 38.0 mg).

$^1\text{H}$  NMR (400 MHz,  $\text{DMSO-}d_6$ )  $\delta$  10.31 (s, 1H), 7.84-7.82 (m, 2H), 2.07. (s, 3H)

$^{13}\text{C}$  NMR (100 MHz,  $\text{DMSO-}d_6$ )  $\delta$  169.6, 139.7, 133.2, 123.4, 119.3, 24.6.

HRMS (ESI-TOF)  $m/z$ :  $[\text{M} + \text{H}]^+$  Calcd for  $\text{C}_8\text{H}_7\text{Cl}_3\text{NO}$  237.9593; Found: 237.9585.

***N*-(1-acetyl-1*H*-indazol-5-yl)acetamide (29a)**

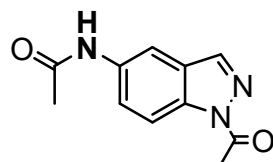

Purified by column chromatography using the mixture of petroleum ether and ethyl acetate (PE/EA = 5:1) as eluant, white solid (82% yield, 35.6 mg).

$^1\text{H}$  NMR (400 MHz,  $\text{CDCl}_3$ )  $\delta$  8.35 (d,  $J = 8.8$  Hz, 1H), 8.26 (s, 1H), 8.10 (s, 1H), 7.55 (s, 1H), 7.36 (dd,  $J = 8.8$  Hz,  $J = 1.9$  Hz, 1H), 2.80 (s, 3H), 2.25 (s, 3H).

$^{13}\text{C}$  NMR (100 MHz,  $\text{CDCl}_3$ )  $\delta$  171.0, 168.6, 139.9, 135.9, 134.5, 126.8, 122.4, 115.8, 111.6, 24.6, 22.9.

HRMS (ESI-TOF)  $m/z$ :  $[\text{M} + \text{H}]^+$  Calcd for  $\text{C}_{11}\text{H}_{12}\text{N}_3\text{O}_2$  218.0929; Found: 218.0922.

***N*-(9H-fluoren-2-yl)acetamide (30a)**

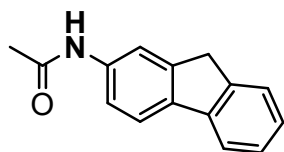

Purified by column chromatography using the mixture of petroleum ether and ethyl acetate (PE/EA = 5:1) as eluant, white solid (89% yield, 39.7 mg).

**<sup>1</sup>H NMR** (400 MHz, CDCl<sub>3</sub>) δ 7.88 (s, 1H), 7.72 (t, *J* = 8.7 Hz, 2H), 7.60-7.49 (m, 2H), 7.36 (d, *J* = 7.8 Hz, 2H), 7.29 (d, *J* = 7.8 Hz, 2H), 3.88 (s, 2H), 2.23 (s, 3H).

**<sup>13</sup>C NMR** (100 MHz, CDCl<sub>3</sub>) δ 168.5, 144.3, 143.2, 141.3, 138.1, 136.7, 126.8, 126.3, 125.0, 120.1, 119.5, 118.7, 117.0, 37.0, 24.7.

**HRMS** (ESI-TOF) *m/z*: [M + H]<sup>+</sup> Calcd for C<sub>15</sub>H<sub>14</sub>NO 224.1075; Found: 224.1069.

***N*-(3-acetyl-2-oxo-2,3-dihydrobenzo[d]thiazol-6-yl)acetamide (31a)**

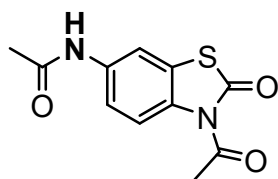

Purified by column chromatography using the mixture of petroleum ether and ethyl acetate (PE/EA = 5:1) as eluant, white solid (77% yield, 38.5 mg).

**<sup>1</sup>H NMR** (400 MHz, CDCl<sub>3</sub>) δ 8.25 (d, *J* = 9.2 Hz, 1H), 8.00 (d, *J* = 2.4 Hz, 1H), 7.60 (s, 1H), 7.11 (dd, *J* = 8.8 Hz, *J* = 2.4 Hz, 1H), 2.75 (s, 3H), 2.14 (s, 3H).

**<sup>13</sup>C NMR** (100 MHz, CDCl<sub>3</sub>) δ 171.2, 170.8, 168.6, 135.5, 130.8, 122.6, 118.2, 118.1, 113.3, 27.3, 24.6.

**HRMS** (ESI-TOF) *m/z*: [M + H]<sup>+</sup> Calcd for C<sub>11</sub>H<sub>11</sub>N<sub>2</sub>O<sub>3</sub>S 251.049; Found: 251.0489.

***N*-(benzo[d]thiazol-6-yl)acetamide (32a)**

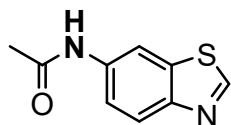

Purified by column chromatography using the mixture of petroleum ether and ethyl acetate (PE/EA = 5:1) as eluant, white solid (79% yield, 30.3 mg).

**<sup>1</sup>H NMR** (400 MHz, CDCl<sub>3</sub>) δ 8.92 (s, 1H), 8.54 (d, *J* = 1.6 Hz, 1H), 8.03-7.99 (m, 2H), 7.35 (dd, *J* = 8.8 Hz, *J* = 2.0 Hz, 1H), 2.23 (s, 3H).

**<sup>13</sup>C NMR** (100 MHz, CDCl<sub>3</sub>) δ 168.9, 153.5, 149.8, 135.9, 134.8, 123.4, 119.1, 112.7, 24.6.

**HRMS** (ESI-TOF) *m/z*: [M + H]<sup>+</sup> Calcd for C<sub>9</sub>H<sub>9</sub>N<sub>2</sub>OS 193.0435; Found: 193.0430.

***N*-(quinoxalin-6-yl)acetamide (33a)**

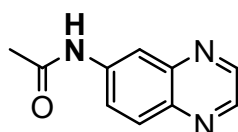

Purified by column chromatography using the mixture of petroleum ether and ethyl acetate (PE/EA = 5:1) as eluant, white solid (64% yield, 23.9 mg).

**<sup>1</sup>H NMR** (400 MHz, MeOH-*d*<sub>4</sub>) δ 8.78 (d, *J* = 2.0 Hz, 1H), 8.73 (d, *J* = 1.6 Hz, 1H), 8.47 (d, *J* = 2.0 Hz, 1H), 7.96 (d, *J* = 8.8 Hz, 1H), 7.87 (dd, *J* = 9.2 Hz, *J* = 2.4 Hz, 1H), 2.22 (s, 3H).

**<sup>13</sup>C NMR** (100 MHz, MeOH-*d*<sub>4</sub>) δ 170.7, 145.3, 143.5, 143.1, 140.4, 139.5, 128.9, 123.9, 115.8, 22.7.

**HRMS** (ESI-TOF) *m/z*: [M + H]<sup>+</sup> Calcd for C<sub>10</sub>H<sub>10</sub>N<sub>3</sub>O 188.0824; Found: 188.0818.

***N*-(naphthalen-1-yl)acetamide (34a)**

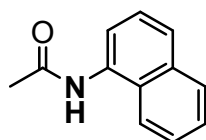

Purified by column chromatography using the mixture of petroleum ether and ethyl acetate (PE/EA = 5:1) as eluant, white solid (81% yield, 30.0 mg)

**<sup>1</sup>H NMR** (400 MHz, DMSO-*d*<sub>6</sub>) δ 9.94 (s, 1H), 8.10 (d, *J* = 8.8 Hz, 1H), 7.95-7.93 (m, 1H), 7.75 (d, *J*

= 8.0 Hz, 1H), 7.71 (d,  $J$  = 7.6 Hz, 1H), 7.58-7.47 (m, 3H), 2.21 (s, 3H).

$^{13}\text{C}$  NMR (100 MHz, DMSO- $d_6$ )  $\delta$  169.4, 134.2, 128.6, 128.1, 126.4, 126.2, 126.0, 125.5, 123.2, 122.0, 24.0.

(Known compound: *ACS Sustainable Chem. Eng.*, 2023, **11**, 9047-9056.).

#### *N*-(quinolin-5-yl)acetamide (35a)

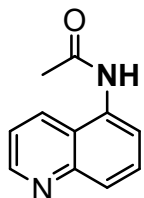

Purified by column chromatography using the mixture of petroleum ether and ethyl acetate (PE/EA = 5:1) as eluant, white solid (73% yield, 27.2 mg)

$^1\text{H}$  NMR (400 MHz, DMSO- $d_6$ )  $\delta$  10.07 (s, 1H), 8.92 (dd,  $J$  = 4.0 Hz,  $J$  = 1.2 Hz, 1H), 8.51 (d,  $J$  = 8.4 Hz, 1H), 7.86 (d,  $J$  = 8.0 Hz, 1H), 7.80 (d,  $J$  = 7.6 Hz, 1H), 7.73 (t,  $J$  = 8.0 Hz, 1H), 7.56 (dd,  $J$  = 8.8 Hz,  $J$  = 4.0 Hz, 1H), 2.21 (s, 3H).

$^{13}\text{C}$  NMR (100 MHz, DMSO- $d_6$ )  $\delta$  169.6, 150.9, 148.6, 134.5, 132.0, 129.5, 126.4, 123.2, 121.8, 121.3, 24.0.

HRMS (ESI-TOF)  $m/z$ :  $[\text{M} + \text{H}]^+$  Calcd for  $\text{C}_{11}\text{H}_{11}\text{N}_2\text{O}$  187.0871; Found: 187.0876.

#### *N*-(quinolin-6-yl)acetamide (36a)

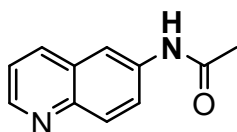

Purified by column chromatography using the mixture of petroleum ether and ethyl acetate (PE/EA = 5:1) as eluant, white solid (69% yield, 25.7 mg).

$^1\text{H}$  NMR (400 MHz, DMSO- $d_6$ )  $\delta$  10.26 (s, 1H), 8.77 (dd,  $J$  = 4.0 Hz,  $J$  = 1.2 Hz, 1H), 8.36, 8.36 (d,  $J$  = 2.0 Hz, 1H), 8.26 (d,  $J$  = 8.4 Hz, 1H), 7.96 (d,  $J$  = 9.2 Hz, 1H), 7.78 (dd,  $J$  = 8.8 Hz,  $J$  = 2.0 Hz, 1H), 7.46 (dd,  $J$  = 8.0 Hz,  $J$  = 4.0 Hz, 1H), 2.13 (s, 3H).

$^{13}\text{C}$  NMR (100 MHz, DMSO- $d_6$ )  $\delta$  169.6, 150.9, 148.6, 134.6, 131.9, 129.5, 126.4, 123.2, 121.8, 121.3, 24.0.

HRMS (ESI-TOF)  $m/z$ :  $[\text{M} + \text{H}]^+$  Calcd for  $\text{C}_{11}\text{H}_{11}\text{N}_2\text{O}$  187.0871; Found: 187.0869.

#### *N*-(5-bromopyridin-2-yl)acetamide (37a)

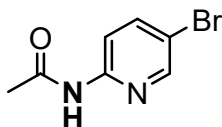

Purified by column chromatography using the mixture of petroleum ether and ethyl acetate (PE/EA = 5:1) as eluant, white solid (57% yield, 24.4 mg).

$^1\text{H}$  NMR (400 MHz, DMSO- $d_6$ )  $\delta$  8.33-8.27 (m, 2H), 8.18 (d,  $J$  = 8.8 Hz, 1H), 7.82 (d,  $J$  = 8.8 Hz, 1H), 2.23 (s, 3H).

$^{13}\text{C}$  NMR (100 MHz, DMSO- $d_6$ )  $\delta$  168.7, 150.0, 148.4, 141.0, 115.3, 114.5, 24.8.

(Known compound: *Org. Biomol. Chem.*, 2020, **18**, 9292-9299)

#### 4-((4-nitrophenyl)thio)aniline (38A)

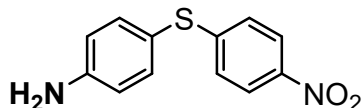

Purified by column chromatography using the mixture of petroleum ether and ethyl acetate (PE/EA = 5:1) as eluant, yellow solid (41% yield, 20.2 mg)

**<sup>1</sup>H NMR** (400 MHz, CDCl<sub>3</sub>) δ 8.05 (d, *J* = 9.2 Hz, 2H), 7.36 (d, *J* = 8.4 Hz, 2H), 7.11 (t, *J* = 9.2 Hz, 2H), 6.77 (d, *J* = 8.4 Hz, 2H), 3.56 (br, 2H).

**<sup>13</sup>C NMR** (100 MHz, CDCl<sub>3</sub>) δ 151.0, 148.3, 144.8, 137.3, 125.2, 123.9, 116.5, 116.2.

**HRMS** (ESI-TOF) *m/z*: [M + H]<sup>+</sup> Calcd for C<sub>12</sub>H<sub>11</sub>N<sub>2</sub>O<sub>2</sub>S 247.0541; Found: 247.0543

#### 4,4'-thiodianiline (38B)<sup>11</sup>

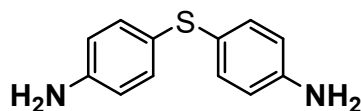

Purified by column chromatography using the mixture of petroleum ether and ethyl acetate (PE/EA = 5:1) as eluant, yellow solid (53% yield, 15.1 mg)

**<sup>1</sup>H NMR** (400 MHz, CDCl<sub>3</sub>) δ 7.18 (d, *J* = 8.4 Hz, 4H), 6.62 (d, *J* = 8.4 Hz, 4H), 3.65 (br, 4H).

**<sup>13</sup>C NMR** (100 MHz, CDCl<sub>3</sub>) δ 145.7, 132.8, 125.0, 115.8.

(Known compound: *Org. Lett.*, 2010, **12**, 2430-2433.)

#### 2-(isopropylsulfonyl)aniline (39)

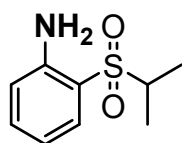

Purified by column chromatography using the mixture of petroleum ether and ethyl acetate (PE/EA = 5:1) as eluant, white solid (78% yield, 31 mg).

**<sup>1</sup>H NMR** (400 MHz, CDCl<sub>3</sub>) δ 7.65 (d, *J* = 8.0 Hz, 1H), 7.36 (t, *J* = 7.2 Hz, 1H), 6.81 (t, *J* = 7.6 Hz, 1H), 6.75 (d, *J* = 8.0 Hz, 1H), 4.67 (br, 2H), 3.40-3.30 (m, 1H), 1.32 (d, *J* = 6.8 Hz, 6H).

**<sup>13</sup>C NMR** (100 MHz, CDCl<sub>3</sub>) δ 147.2, 135.0, 131.2, 118.1, 117.6, 117.5, 54.1, 15.3.

**HRMS** (ESI-TOF) *m/z*: [M + H]<sup>+</sup> Calcd for C<sub>9</sub>H<sub>14</sub>NO<sub>2</sub>S 200.0745; Found: 200.0736.

#### *N*<sup>1</sup>-(2-(dimethylamino)ethyl)-5-methoxy-*N*<sup>1</sup>-methyl-N<sup>4</sup>-(4-(1-methyl-1H-indol-2-yl)pyrimidin-2-yl)benzene-1,2,4-triamine (40)

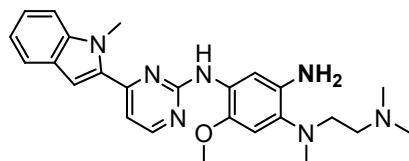

Purified by column chromatography using the mixture of petroleum ether and ethyl acetate (DCM/MeOH = 3:1) as eluant, white solid (45% yield, 40.1 mg)

**<sup>1</sup>H NMR** (400 MHz, DMSO-*d*<sub>6</sub>) δ 8.44 (d, *J* = 7.6 Hz, 1H), 8.30 (s, 1H), 8.28 (d, *J* = 5.6 Hz, 1H), 7.80 (s, 1H), 7.52-7.50 (m, 2H), 7.25 (t, *J* = 8.4 Hz, 1H), 7.19 (d, *J* = 8.0 Hz, 1H), 7.15 (d, *J* = 5.2 Hz, 1H), 6.77 (s, 1H), 4.58 (s, 2H), 3.87 (s, 3H), 3.75 (s, 3H), 2.89 (t, *J* = 6.8 Hz, 2H), 2.64 (s, 3H), 2.36 (t, *J* = 6.4 Hz, 2H), 2.17 (s, 6H).

**<sup>13</sup>C NMR** (100 MHz, DMSO-*d*<sub>6</sub>) δ 162.5, 160.9, 157.4, 142.2, 138.1, 137.2, 133.8, 133.3, 126.0, 125.7, 122.7, 122.6, 121.4, 112.9, 110.8, 109.5, 107.2, 105.7, 57.9, 56.9, 54.5, 46.2, 42.1, 40.6, 33.5.

**HRMS** (ESI-TOF) *m/z*: [M + H]<sup>+</sup> Calcd for C<sub>25</sub>H<sub>32</sub>N<sub>7</sub>O 446.2668; Found: 446.2660.

#### 4-fluoro-2-methoxyaniline (41)

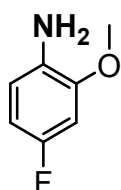

Purified by column chromatography using the mixture of petroleum ether and ethyl acetate (PE/EA = 10:1) as eluant, white solid (85% yield, 24.0 mg).

**<sup>1</sup>H NMR** (400 MHz, CDCl<sub>3</sub>) δ 6.64 (t, *J* = 7.6 Hz, 1H), 6.58 (dd, *J* = 10.4 Hz, *J* = 2.4 Hz, 1H), 6.53 (t, *J* = 8.4 Hz, 1H), 3.85 (s, 3H), 3.58 (br, 2H).

**<sup>13</sup>C NMR** (100 MHz, CDCl<sub>3</sub>) δ 156.4 (d, *J*<sub>F-C</sub> = 234.1 Hz), 147.8 (d, *J*<sub>F-C</sub> = 9.4 Hz), 132.0 (d, *J*<sub>F-C</sub> = 2.6 Hz), 114.7 (d, *J*<sub>F-C</sub> = 9.1 Hz), 106.4 (d, *J*<sub>F-C</sub> = 21.7 Hz), 99.1 (d, *J*<sub>F-C</sub> = 16.7 Hz), 55.7.

**<sup>19</sup>F NMR** (376 MHz, CDCl<sub>3</sub>) δ -124.19.

**HRMS** (ESI-TOF) *m/z*: [M + H]<sup>+</sup> Calcd for C<sub>7</sub>H<sub>9</sub>FNO 142.0668; Found: 142.0662.

***N*<sup>4</sup>-(3-chloro-4-fluorophenyl)-7-methoxyquinazoline-4,6-diamine (42)**

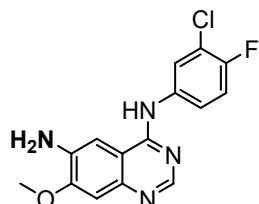

Purified by column chromatography using the mixture of petroleum ether and ethyl acetate (PE/EA = 5:1) as eluant, white solid (67% yield, 42.6 mg).

**<sup>1</sup>H NMR** (400 MHz, DMSO) δ 9.40 (s, 1H), 8.39 (s, 1H), 8.21-8.19 (m, 1H), 7.83-7.80 (m, 1H), 7.42-7.38 (m, 2H), 7.11 (s, 1H), 5.40 (br, 2H), 3.97 (s, 3H).

**<sup>13</sup>C NMR** (100 MHz, DMSO) δ 155.5, 153.1 (d, *J*<sub>F-C</sub> = 240.3 Hz), 153.2, 150.7, 145.3, 139.0, 138.0, 122.9, 121.9 (d, *J*<sub>F-C</sub> = 6.7 Hz), 119.0 (d, *J*<sub>F-C</sub> = 18.1 Hz), 116.8 (d, *J*<sub>F-C</sub> = 21.4 Hz), 110.9, 106.4, 101.3, 56.3.

**<sup>19</sup>F NMR** (376 MHz, DMSO) δ -124.36.

**HRMS** (ESI-TOF) *m/z*: [M + H]<sup>+</sup> Calcd for C<sub>15</sub>H<sub>13</sub>ClFN<sub>4</sub>O 319.0762; Found: 319.0757.

**(*S*)-*N*<sup>4</sup>-(3-chloro-4-fluorophenyl)-7-((tetrahydrofuran-3-yl)oxy)quinazoline-4,6-diamine (43)**

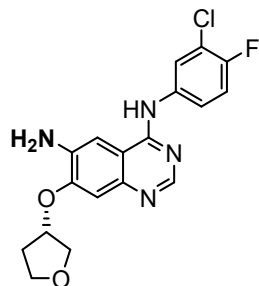

Purified by column chromatography using the mixture of petroleum ether and ethyl acetate (PE/EA = 5:1) as eluant, white solid (78% yield, 58.4 mg).

**<sup>1</sup>H NMR** (400 MHz, CDCl<sub>3</sub>) δ 8.58 (s, 1H), 7.92-7.90 (m, 2H), 7.52-7.48 (m, 2H), 7.36 (s, 1H), 7.14 (t, *J* = 8.4 Hz, 1H), 7.11, 7.09 (s, 1H), 7.00 (s, 1H), 5.09-5.07 (m, 1H), 4.28 (br, 2H), 4.11-4.08 (m, 1H), 4.05-4.01 (m, 2H), 3.96-3.90 (m, 1H), 2.37-2.28 (m, 1H), 2.25-2.19 (m, 1H).

**<sup>13</sup>C NMR** (100 MHz, CDCl<sub>3</sub>) δ 154.5 (d, *J*<sub>F-C</sub> = 244.3 Hz), 155.23, 151.9, 150.9, 145.5, 137.9, 135.5, 123.7, 121.1 (d, *J*<sub>F-C</sub> = 6.7 Hz), 121.1 (d, *J*<sub>F-C</sub> = 18.5 Hz), 116.5 (d, *J*<sub>F-C</sub> = 21.9 Hz), 110.1, 108.1, 100.8, 78.6, 73.0, 67.3, 32.8.

**<sup>19</sup>F NMR** (376 MHz, CDCl<sub>3</sub>) δ -121.30.

**HRMS** (ESI-TOF) *m/z*: [M + H]<sup>+</sup> Calcd for C<sub>18</sub>H<sub>17</sub>ClFN<sub>4</sub>O<sub>2</sub> 375.1024; Found: 375.1021.

**ethyl 2-amino-4,5-bis(2-methoxyethoxy)benzoate (44)**

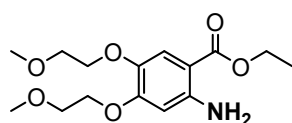

Purified by column chromatography using the mixture of petroleum ether and ethyl acetate (PE/EA = 5:1) as eluant, white solid (81% yield, 50.7 mg).

**<sup>1</sup>H NMR** (400 MHz, CDCl<sub>3</sub>) δ 7.45 (s, 1H), 6.17 (s, 1H), 4.30 (q, *J* = 7.2 Hz, 2H), 4.13 (t, *J* = 4.4 Hz, 2H), 4.09 (t, *J* = 4.4 Hz, 2H), 3.78 (t, *J* = 4.8 Hz, 2H), 3.74 (t, *J* = 4.8 Hz, 2H), 3.45 (d, *J* = 3.2 Hz, 6H), 1.37 (t, *J* = 7.2 Hz, 3H).

**<sup>13</sup>C NMR** (100 MHz, CDCl<sub>3</sub>) δ 167.7, 155.2, 147.4, 139.7, 118.2, 103.2, 100.9, 71.2, 70.7, 70.1, 68.0, 60.1, 59.2, 59.1, 14.5.

**HRMS** (ESI-TOF) *m/z*: [M + H]<sup>+</sup> Calcd for C<sub>15</sub>H<sub>24</sub>NO<sub>6</sub> 314.1603; Found: 314.1602.

### 3-chloro-4-((3-fluorobenzyl)oxy)aniline (45)

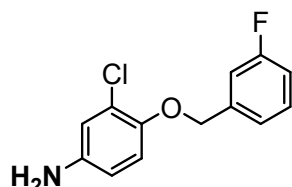

Purified by column chromatography using the mixture of petroleum ether and ethyl acetate (PE/EA = 10:1) as eluant, white solid (83% yield, 41.7 mg)

**<sup>1</sup>H NMR** (400 MHz, CDCl<sub>3</sub>) δ 7.38-7.33 (m, 1H), 7.24-7.20 (m, 2H), 7.04-7.00 (m, 1H), 6.81-6.78 (m, 2H), 6.52 (dd, *J* = 8.8 Hz, *J* = 2.8 Hz, 1H), 5.05 (br, 2H), 3.53 (s, 2H).

**<sup>13</sup>C NMR** (100 MHz, CDCl<sub>3</sub>) δ 163.0 (d, *J*<sub>F-C</sub> = 244.4 Hz), 146.9, 141.6, 139.7 (d, *J*<sub>F-C</sub> = 7.3 Hz), 130.0 (d, *J*<sub>F-C</sub> = 8.1 Hz), 124.5, 122.7, 122.6, 117.1 (d, *J*<sub>F-C</sub> = 29.7 Hz), 114.7 (d, *J*<sub>F-C</sub> = 21.1 Hz), 114.2 (d, *J*<sub>F-C</sub> = 21.9 Hz), 114.2, 71.4 (d, *J*<sub>F-C</sub> = 1.8 Hz).

**<sup>19</sup>F NMR** (376 MHz, CDCl<sub>3</sub>) δ -112.93.

**HRMS** (ESI-TOF) *m/z*: [M + H]<sup>+</sup> Calcd for C<sub>13</sub>H<sub>12</sub>ClFNO 252.0591; Found: 252.0587.

### 3-chloro-4-(pyridin-2-ylmethoxy)aniline (46)

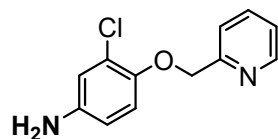

Purified by column chromatography using the mixture of petroleum ether and ethyl acetate (PE/EA = 10:1) as eluant, white solid (81% yield, 37.9 mg).

**<sup>1</sup>H NMR** (400 MHz, CDCl<sub>3</sub>) δ 8.58 (d, *J* = 8.8 Hz, 1H), 7.74 (td, *J* = 7.6 Hz, *J* = 1.6 Hz, 1H), 7.76 (d, *J* = 7.6 Hz, 1H), 7.25-7.22 (m, 1H), 6.82 (d, *J* = 8.8 Hz, 1H), 6.78 (d, *J* = 2.8 Hz, 1H), 6.53 (dd, *J* = 8.8 Hz, *J* = 2.8 Hz, 1H), 5.20 (br, 2H), 3.27 (s, 2H).

**<sup>13</sup>C NMR** (100 MHz, CDCl<sub>3</sub>) δ 157.3, 149.0, 146.8, 141.3, 136.9, 123.9, 122.6, 121.3, 117.2, 115.9, 114.3, 72.3.

**HRMS** (ESI-TOF) *m/z*: [M + H]<sup>+</sup> Calcd for C<sub>12</sub>H<sub>12</sub>ClN<sub>2</sub>O 235.0638; Found: 235.0633.

### 1-(2-amino-4,5-dimethoxyphenyl)ethan-1-one (47)

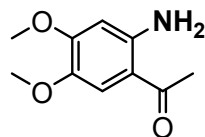

Purified by column chromatography using the mixture of petroleum ether and ethyl acetate (PE/EA = 10:1) as eluant, white solid (79% yield, 30.8 mg)

**<sup>1</sup>H NMR** (400 MHz, CDCl<sub>3</sub>) δ 7.12 (s, 1H), 6.47-6.14 (m, 3H), 3.89 (s, 3H), 3.86 (s, 3H), 2.54 (s, 3H).

**<sup>13</sup>C NMR** (100 MHz, CDCl<sub>3</sub>) δ 198.4, 155.4, 147.5, 140.1, 114.1, 110.6, 99.3, 56.8, 55.8, 27.8.

**HRMS** (ESI-TOF) *m/z*: [M + H]<sup>+</sup> Calcd for C<sub>10</sub>H<sub>14</sub>NO<sub>3</sub> 196.0973; Found: 196.0969.

**tert-butyl 4-(6-aminopyridin-3-yl)piperazine-1-carboxylate (48)**

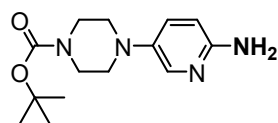

Purified by column chromatography using the mixture of petroleum ether and ethyl acetate (PE/EA = 10:1) as eluant, white solid (73% yield, 40.6 mg)

**<sup>1</sup>H NMR** (400 MHz, CDCl<sub>3</sub>) δ 7.78 (d, *J* = 2.8 Hz, 1H), 7.19 (dd, *J* = 8.8 Hz, *J* = 2.4 Hz, 1H), 6.51 (d, *J* = 8.8 Hz, 1H), 4.29 (s, 2H), 3.58 (t, *J* = 4.8 Hz, 4H), 2.97 (t, *J* = 4.4 Hz, 4H), 1.49 (s, 9H).

**<sup>13</sup>C NMR** (100 MHz, CDCl<sub>3</sub>) δ 154.7, 153.3, 140.6, 137.2, 129.8, 109.3, 80.0, 51.0, 28.4.

**HRMS** (ESI-TOF) *m/z*: [M + H]<sup>+</sup> Calcd for C<sub>14</sub>H<sub>23</sub>N<sub>4</sub>O<sub>2</sub> 279.1821; Found: 279.1817.

**Ethyl 6-(4-aminophenyl)-1-(4-methoxyphenyl)-7-oxo-4,5,6,7-tetrahydro-1H-pyrazolo[3,4-c]pyridine-3-carboxylate (49)**

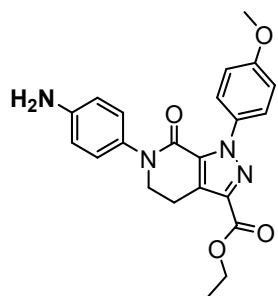

Purified by column chromatography using the mixture of petroleum ether and ethyl acetate (PE/EA = 10:1) as eluant, white solid (61% yield, 49.6 mg)

**<sup>1</sup>H NMR** (400 MHz, CDCl<sub>3</sub>) δ 7.50 (d, *J* = 4.8 Hz, 2H), 7.09 (d, *J* = 8.8 Hz, 2H), 6.91 (d, *J* = 9.2 Hz, 2H), 6.68 (d, *J* = 8.8 Hz, 2H), 4.50 (q, *J* = 7.2 Hz, 2H), 4.05 (t, *J* = 6.4 Hz, 2H), 3.82 (s, 3H), 3.32-3.19 (m, 4H), 1.45 (t, *J* = 7.2 Hz, 3H).

**<sup>13</sup>C NMR** (100 MHz, CDCl<sub>3</sub>) δ 162.2, 159.8, 157.4, 144.7, 138.9, 133.3, 132.9, 132.6, 127.0, 126.7, 126.6, 115.5, 113.6, 61.2, 55.5, 51.4, 21.5, 14.4.

**HRMS** (ESI-TOF) *m/z*: [M + H]<sup>+</sup> Calcd for C<sub>22</sub>H<sub>23</sub>N<sub>4</sub>O<sub>4</sub> 407.1719; Found: 407.1716.

**2-amino-4,5-bis(2-methoxyethoxy)benzamide (50)**

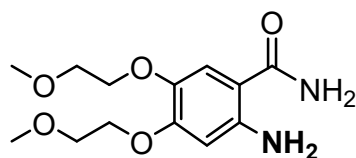

Purified by column chromatography using the mixture of petroleum ether and ethyl acetate (PE/EA = 10:1) as eluant, white solid (75% yield, 42.6 mg).

**<sup>1</sup>H NMR** (400 MHz, CDCl<sub>3</sub>) δ 7.05 (s, 1H), 6.40-6.02 (m, 3H), 5.28 (br, 2H), 4.05-4.01 (m, 4H), 3.72 (t, *J* = 5.2 Hz, 2H), 3.64 (t, *J* = 4.8 Hz, 2H), 3.38 (d, *J* = 7.2 Hz, 6H).

**<sup>13</sup>C NMR** (100 MHz, CDCl<sub>3</sub>) δ 171.5, 154.2, 146.8, 139.1, 117.3, 105.8, 101.6, 71.29, 70.7, 70.6, 67.8, 59.1, 58.9.

**HRMS** (ESI-TOF) *m/z*: [M + H]<sup>+</sup> Calcd for C<sub>13</sub>H<sub>21</sub>N<sub>2</sub>O<sub>5</sub> 285.1450; Found: 285.1461.

**5-methoxy-2-phenoxyaniline (51)**

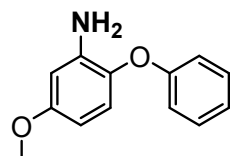

Purified by column chromatography using the mixture of petroleum ether and ethyl acetate (PE/EA = 15:1) as eluant, white solid (75% yield, 32.3 mg).

**<sup>1</sup>H NMR** (400 MHz, CDCl<sub>3</sub>) δ 7.31 (t, *J* = 8.0 Hz, 2H), 7.05 (t, *J* = 7.2 Hz, 1H), 6.96 (d, *J* = 8.0 Hz, 2H), 6.87 (d, *J* = 8.8 Hz, 1H), 6.42 (d, *J* = 2.8 Hz, 1H), 6.31 (dd, *J* = 8.8 Hz, *J* = 2.8 Hz, 1H), 3.80 (s, 3H),

3.62 (br, 2H).

$^{13}\text{C}$  NMR (100 MHz,  $\text{CDCl}_3$ )  $\delta$  158.3, 157.2, 139.8, 136.5, 129.7, 122.2, 121.9, 116.1, 103.7, 102.2, 55.5.

HRMS (ESI-TOF)  $m/z$ :  $[\text{M} + \text{H}]^+$  Calcd for  $\text{C}_{13}\text{H}_{14}\text{NO}_2$  216.1024; Found: 216.1020.

**benzyl (2-aminobenzoyl)glycinate (52)**

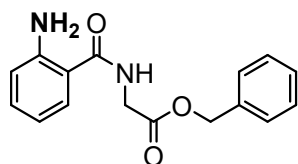

Purified by column chromatography using the mixture of petroleum ether and ethyl acetate (PE/EA = 5:1) as eluant, white solid (80% yield, 45.5 mg).

$^1\text{H}$  NMR (400 MHz,  $\text{CDCl}_3$ )  $\delta$  7.44-7.37 (m, 6H), 7.26-7.22 (m, 1H), 6.71-6.65 (m, 3H), 5.25-5.03 (m, 4H), 4.25 (d,  $J$  = 4.8 Hz, 2H).

$^{13}\text{C}$  NMR (100 MHz,  $\text{CDCl}_3$ )  $\delta$  170.1, 169.2, 148.6, 135.2, 132.7, 128.7, 128.6, 128.4, 127.5, 117.4, 116.8, 115.2, 67.3, 41.6.

HRMS (ESI-TOF)  $m/z$ :  $[\text{M} + \text{H}]^+$  Calcd for  $\text{C}_{16}\text{H}_{17}\text{N}_2\text{O}_3$  285.1239; Found: 285.1237.

**ethyl 3-(3-amino-4-(methylamino)-*N*-(pyridin-2-yl)benzamido)propanoate (53)**

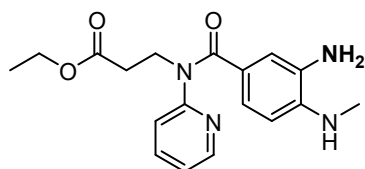

Purified by column chromatography using the mixture of petroleum ether and ethyl acetate (PE/EA = 5:1) as eluant, white solid (62% yield, 42.4 mg).

$^1\text{H}$  NMR (400 MHz,  $\text{CDCl}_3$ )  $\delta$  8.43 (s, 1H), 7.42-7.36 (m, 1H), 7.03-6.98 (m, 1H), 6.86-6.82 (m, 1H), 6.76-6.70 (m, 2H), 6.35-6.28 (m, 1H), 4.41-4.35 (m, 2H), 4.10-4.03 (m, 2H), 3.46 (s, 3H), 2.81-2.73 (m, 5H), 1.23-1.17 (m, 3H).

$^{13}\text{C}$  NMR (100 MHz,  $\text{CDCl}_3$ )  $\delta$  171.9, 171.0, 156.8, 148.6, 141.6, 137.0, 132.5, 124.2, 123.4, 122.5, 120.5, 117.5, 108.3, 60.4, 44.5, 33.5, 30.5, 14.1.

HRMS (ESI-TOF)  $m/z$ :  $[\text{M} + \text{H}]^+$  Calcd for  $\text{C}_{18}\text{H}_{23}\text{N}_4\text{O}_3$  343.1770; Found: 343.1773

**1-(4-amino-2-methylbenzoyl)-7-chloro-1,2,3,4-tetrahydro-5H-benzo[b]azepin-5-one (54)**

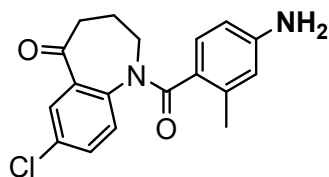

Purified by column chromatography using the mixture of petroleum ether and ethyl acetate (PE/EA = 10:1) as eluant, white solid (77% yield, 50.5 mg).

$^1\text{H}$  NMR (400 MHz,  $\text{CDCl}_3$ )  $\delta$  7.78 (d,  $J$  = 2.4 Hz, 1H), 7.21 (d,  $J$  = 7.2 Hz, 1H), 6.77 (s, 1H), 6.64 (d,  $J$  = 6.0 Hz, 1H), 6.45 (d,  $J$  = 1.6 Hz, 1H), 6.24 (d,  $J$  = 7.6, 1H), 3.99-3.63 (m, 4H), 2.89 (t,  $J$  = 6.8 Hz, 2H), 2.34 (s, 3H), 2.14 (s, 2H).

$^{13}\text{C}$  NMR (100 MHz,  $\text{CDCl}_3$ )  $\delta$  200.5, 171.2, 147.4, 141.8, 138.0, 135.1, 132.6, 129.9, 129.2, 129.0, 125.1, 116.8, 111.7, 47.4, 40.1, 23.1, 20.0.

HRMS (ESI-TOF)  $m/z$ :  $[\text{M} + \text{H}]^+$  Calcd for  $\text{C}_{18}\text{H}_{18}\text{ClN}_2\text{O}_2$  329.1057; Found: 329.1054.



***tert*-butyl (*S*)-(4-aminophenethyl)(2-hydroxy-2-phenylethyl)carbamate (55)**

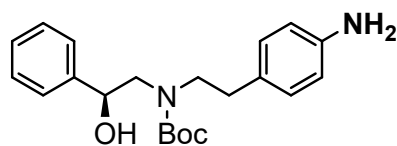

Purified by column chromatography using the mixture of petroleum ether and ethyl acetate (PE/EA = 3:1) as eluant, white solid (85% yield, 60.6 mg)

**<sup>1</sup>H NMR** (400 MHz, CDCl<sub>3</sub>) δ 7.37-7.36 (m, 5H), 6.92 (d, *J* = 6.8 Hz, 2H), 6.63 (d, *J* = 8.0 Hz, 2H), 4.89 (d, *J* = 6.4 Hz, 1H), 3.54-3.21 (m, 7H), 2.70-2.56 (m, 2H), 1.49 (s, 9H).

**<sup>13</sup>C NMR** (100 MHz, CDCl<sub>3</sub>) δ 158.1, 144.7, 142.5, 129.6, 128.9, 128.4, 127.5, 125.9, 115.4, 80.5, 74.4, 56.7, 51.7, 34.1, 28.4.

**HRMS** (ESI-TOF) *m/z*: [M + H]<sup>+</sup> Calcd for C<sub>21</sub>H<sub>29</sub>N<sub>2</sub>O<sub>3</sub> 357.2178; Found: 357.2165.

**4-(1,2,4-oxadiazol-3-yl)aniline (56)**

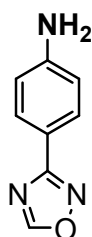

Purified by column chromatography using the mixture of petroleum ether and ethyl acetate (PE/EA = 10:1) as eluant, white solid (67% yield, 21.6 mg).

**<sup>1</sup>H NMR** (400 MHz, CDCl<sub>3</sub>) δ 8.69 (s, 1H), 7.93 (d, *J* = 8.8 Hz, 2H), 6.76 (d, *J* = 8.4 Hz, 2H), 4.02 (br, 2H).

**<sup>13</sup>C NMR** (100 MHz, CDCl<sub>3</sub>) δ 167.6, 164.2, 149.4, 129.1, 116.0, 114.8.

**HRMS** (ESI-TOF) *m/z*: [M + H]<sup>+</sup> Calcd for C<sub>8</sub>H<sub>8</sub>N<sub>3</sub>O 162.0667; Found: 162.0662.

**3-bromo-2-methoxyaniline (57)**

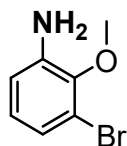

Purified by column chromatography using the mixture of petroleum ether and ethyl acetate (PE/EA = 15:1) as eluant, white solid (79% yield, 31.8 mg)

**<sup>1</sup>H NMR** (400 MHz, CDCl<sub>3</sub>) δ 6.93 (d, *J* = 8.0 Hz, 1H), 6.80 (t, *J* = 8.0 Hz, 1H), 6.70 (d, *J* = 7.6 Hz, 1H), 3.85 (s, 3H), 3.73 (br, 2H).

**<sup>13</sup>C NMR** (100 MHz, CDCl<sub>3</sub>) δ 144.2, 141.3, 125.8, 122.5, 117.1, 115.1, 59.6.

**HRMS** (ESI-TOF) *m/z*: [M - H]<sup>+</sup> Calcd for C<sub>7</sub>H<sub>7</sub>BrNO 199.9703; Found: 199.9708.

**4-amino-2-fluoro-*N*-methylbenzamide (58)**

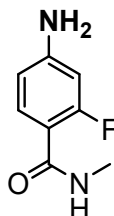

Purified by column chromatography using the mixture of petroleum ether and ethyl acetate (PE/EA = 5:1) as eluant, white solid (66% yield, 22.2 mg).

**<sup>1</sup>H NMR** (400 MHz, CDCl<sub>3</sub>) δ 7.91 (t, *J* = 8.8 Hz, 1H), 6.63 (s, 1H), 6.49 (dd, *J* = 8.4 Hz, *J* = 2.0 Hz, 1H), 6.33 (dd, *J* = 14.4 Hz, *J* = 2.0 Hz, 1H), 4.18 (br, 2H), 3.00 (dd, *J* = 4.8 Hz, *J* = 0.8 Hz, 3H).

**<sup>13</sup>C NMR** (100 MHz, CDCl<sub>3</sub>) δ 164.4 (d, *J*<sub>F-C</sub> = 3.7 Hz), 162.2 (d, *J*<sub>F-C</sub> = 243.1 Hz), 151.4 (d, *J*<sub>F-C</sub> = 12.7 Hz), 133.3 (d, *J*<sub>F-C</sub> = 4.3 Hz), 110.8 (d, *J*<sub>F-C</sub> = 1.8 Hz), 110.2 (d, *J*<sub>F-C</sub> = 1.7 Hz), 100.8 (d, *J*<sub>F-C</sub> = 28.5 Hz), 26.6

**<sup>19</sup>F NMR** (376 MHz, CDCl<sub>3</sub>) δ -112.86.

**HRMS** (ESI-TOF) m/z: [M + H]<sup>+</sup> Calcd for C<sub>8</sub>H<sub>10</sub>FN<sub>2</sub>O 169.0778; Found: 169.0771.

### 2-(4-aminophenyl)propanenitrile (59)

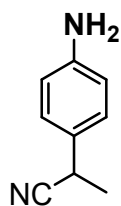

Purified by column chromatography using the mixture of petroleum ether and ethyl acetate (PE/EA = 10:1) as eluant, white solid (76% yield, 22.2 mg).

**<sup>1</sup>H NMR** (400 MHz, CDCl<sub>3</sub>) δ 7.14 (d, *J* = 8.4 Hz, 2H), 6.71-6.68 (m, 2H), 3.84-3.78 (m, 2H), 1.61 (d, *J* = 7.6 Hz, 3H).

**<sup>13</sup>C NMR** (100 MHz, CDCl<sub>3</sub>) δ 146.2, 127.7, 126.8, 122.2, 115.4, 30.5, 21.5.

**HRMS** (ESI-TOF) m/z: [M + H]<sup>+</sup> Calcd for C<sub>9</sub>H<sub>11</sub>N<sub>2</sub> 147.0922; Found: 147.0917.

### ethyl 4-aminobenzoate (60)

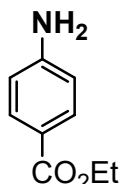

Purified by column chromatography using the mixture of petroleum ether and ethyl acetate (PE/EA = 10:1) as eluant, white solid (85% yield, 28.1 mg).

**<sup>1</sup>H NMR** (400 MHz, CDCl<sub>3</sub>) δ 7.88 (d, *J* = 8.8 Hz, 2H), 6.66 (d, *J* = 8.4 Hz, 2H), 4.36 (br, 2H), 4.32 (q, *J* = 7.2 Hz, 2H), 1.38 (t, *J* = 7.2 Hz, 3H).

**<sup>13</sup>C NMR** (100 MHz, CDCl<sub>3</sub>) δ 166.8, 150.8, 131.6, 120.0, 113.8, 60.3, 14.4.

**HRMS** (ESI) m/z: [M + H]<sup>+</sup> Calcd for C<sub>9</sub>H<sub>12</sub>NO<sub>2</sub> 166.0868; Found: 166.0863.

### butyl 4-aminobenzoate (61)

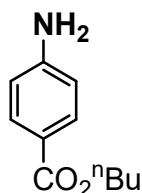

Purified by column chromatography using the mixture of petroleum ether and ethyl acetate (PE/EA = 10:1) as eluant, white solid (81% yield, 31.3 mg).

**<sup>1</sup>H NMR** (400 MHz, CDCl<sub>3</sub>) δ 7.88 (d, *J* = 8.4 Hz, 2H), 6.67 (d, *J* = 8.8 Hz, 2H), 4.28 (t, *J* = 6.8 Hz, 2H), 4.00 (br, 2H), 1.78-1.71 (m, 2H), 1.53-1.44 (m, 2H), 0.99 (t, *J* = 7.6 Hz, 3H).

**<sup>13</sup>C NMR** (100 MHz, CDCl<sub>3</sub>) δ 166.8, 150.5, 131.6, 120.3, 113.9, 64.3, 30.9, 19.3, 13.8.

**HRMS** (ESI) m/z: [M + H]<sup>+</sup> Calcd for C<sub>11</sub>H<sub>16</sub>NO<sub>2</sub> 194.1182; Found: 194.1177.

## Reference

- [1] X. Li, Y. Tan, Z. Liu, J. Su, Y. Xiao, B. Qiao, Y. Ding, *J. Catal.*, 2022, **416**, 332-343.
- [2] D. E. Wise, E. S. Gogarnoiu, A. D. Duke, J. M. Paolillo, T. L. Vacala, W. A. Hussain and M. Parasram, *J. Am. Chem. Soc.*, 2022, **144**, 15437-15442.
- [3] R. Hurley and A. C. Testa, *J. Am. Chem. Soc.*, 1966, **88**, 4330-4332.
- [4] R. S. Macomber, *J. Chem. Educ.*, 1992, **69**, 375-378.
- [5] R. Foeter and C. A. Fyfe, *Trans. Faraday Soc.*, 1965, **61**, 1626-1631.

## VI. Copies of NMR Spectra

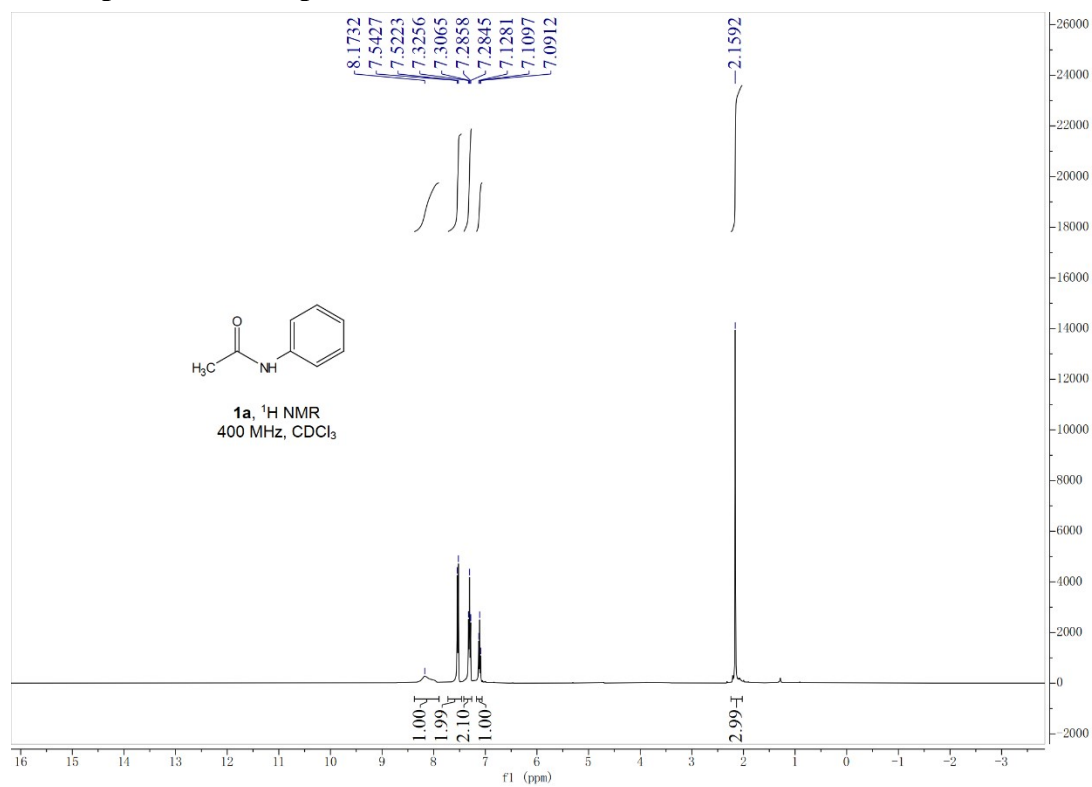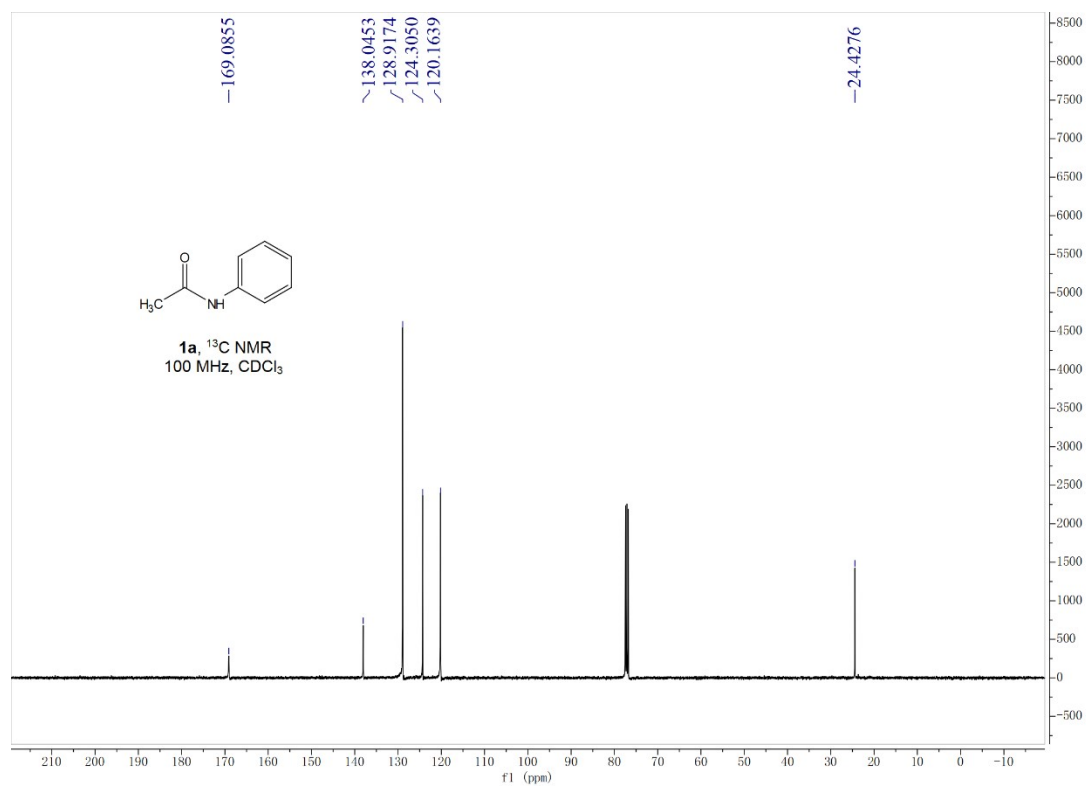

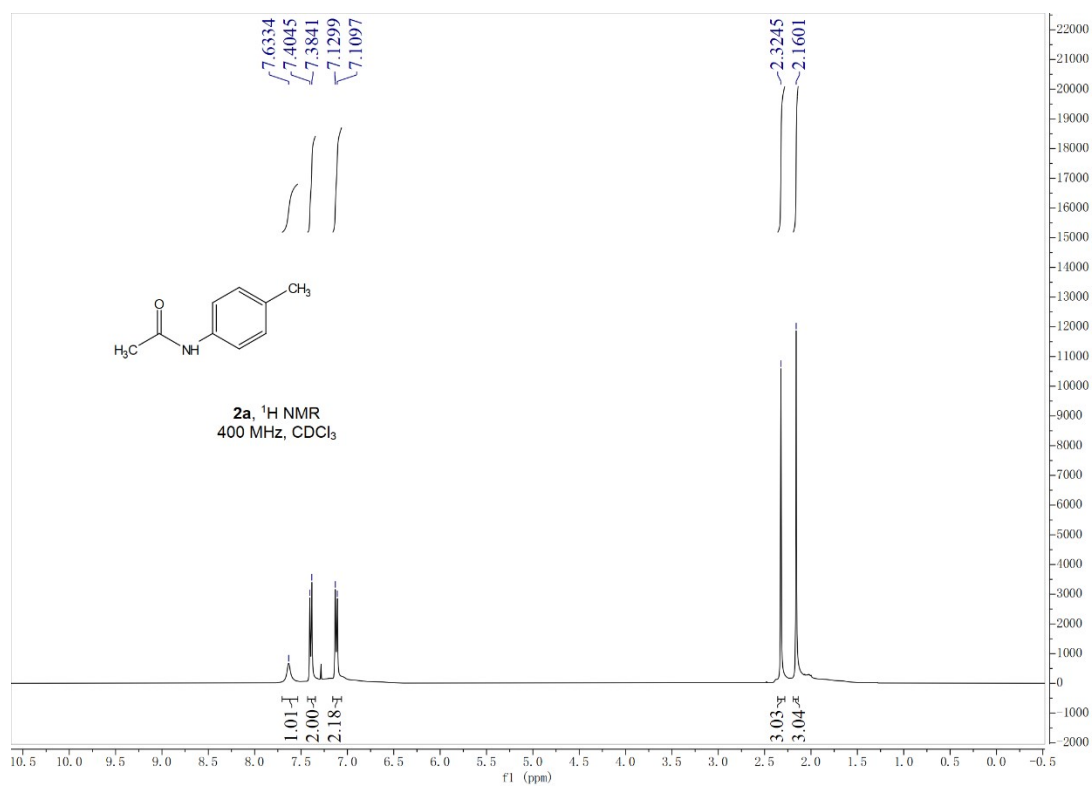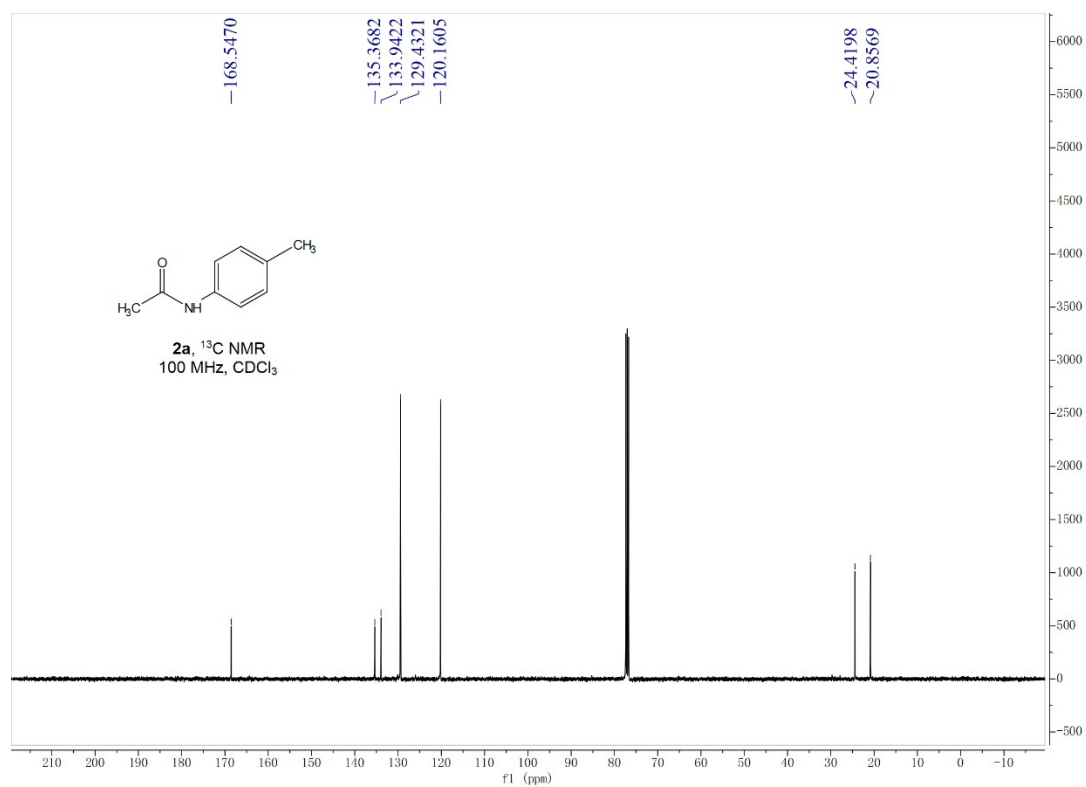

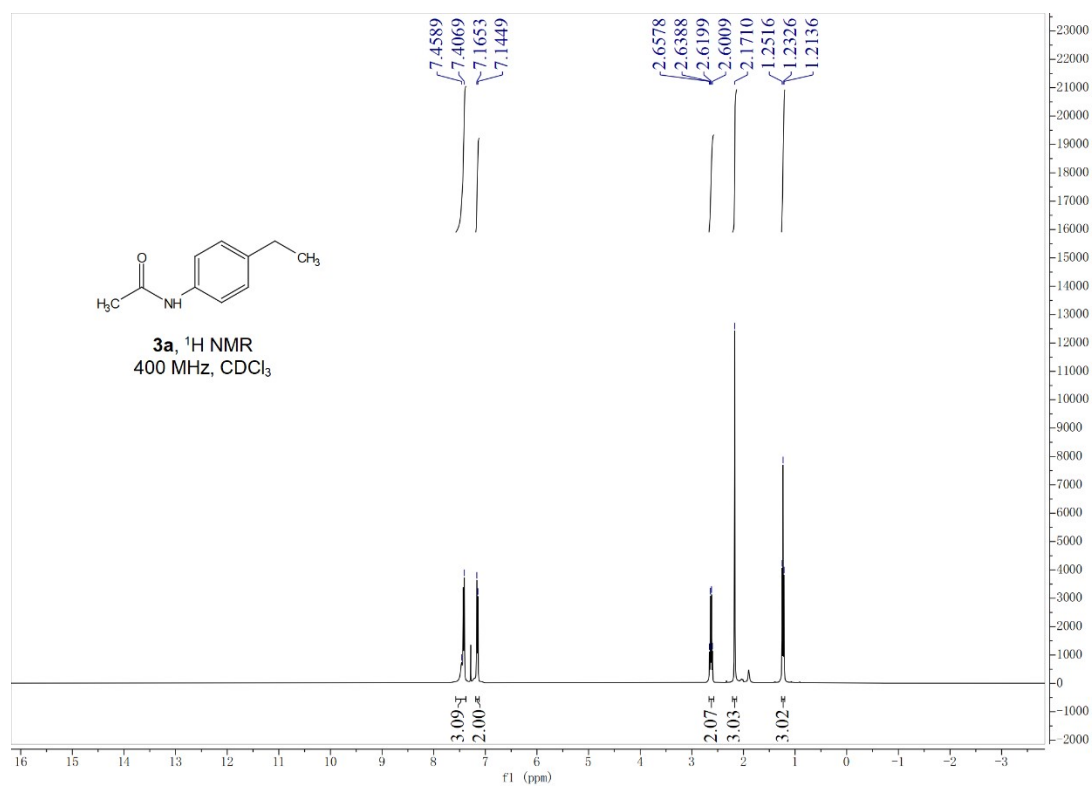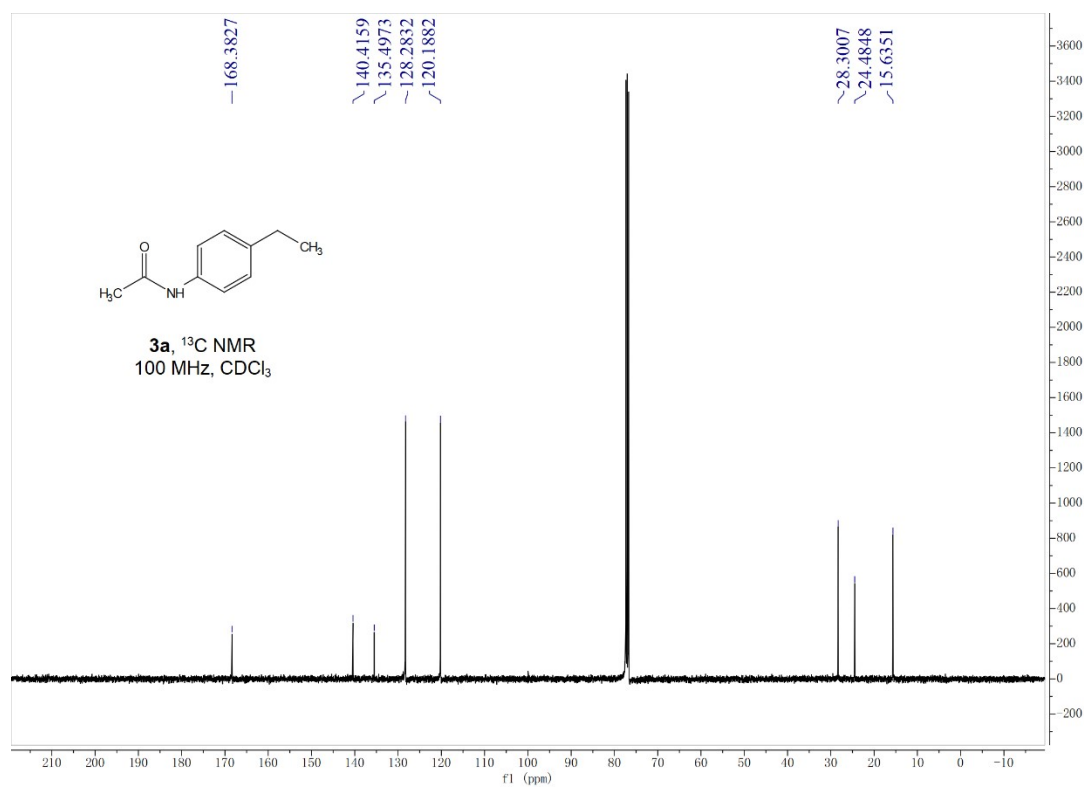

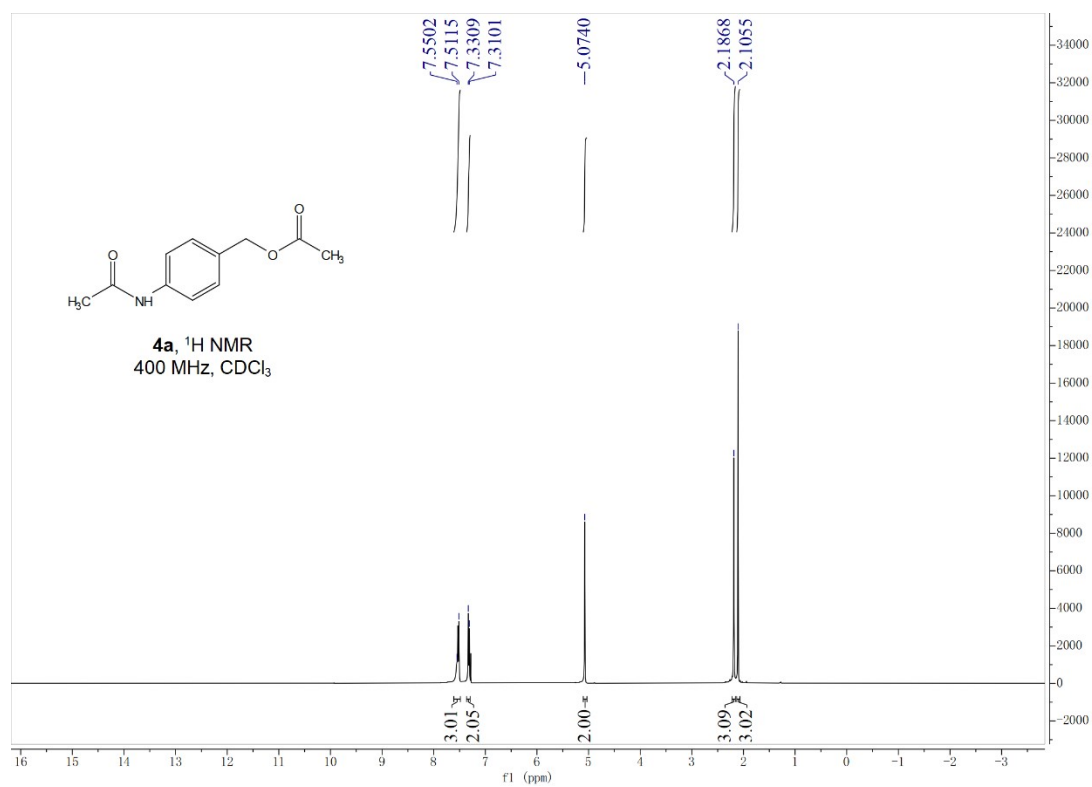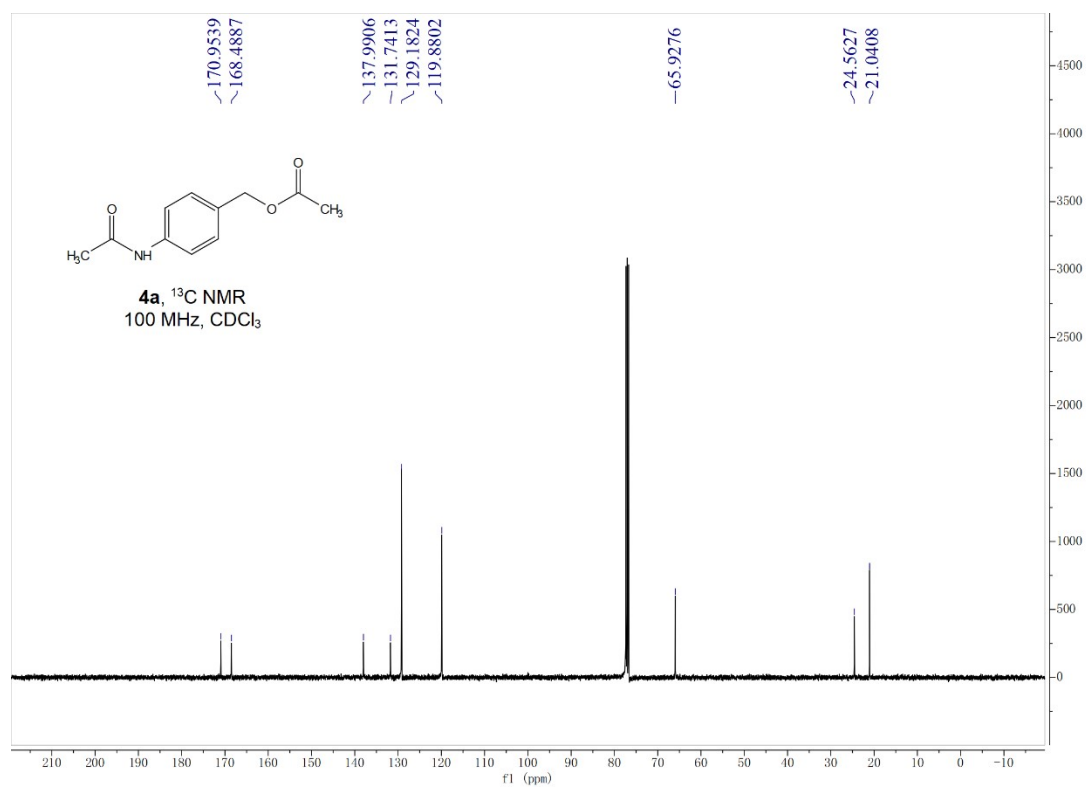

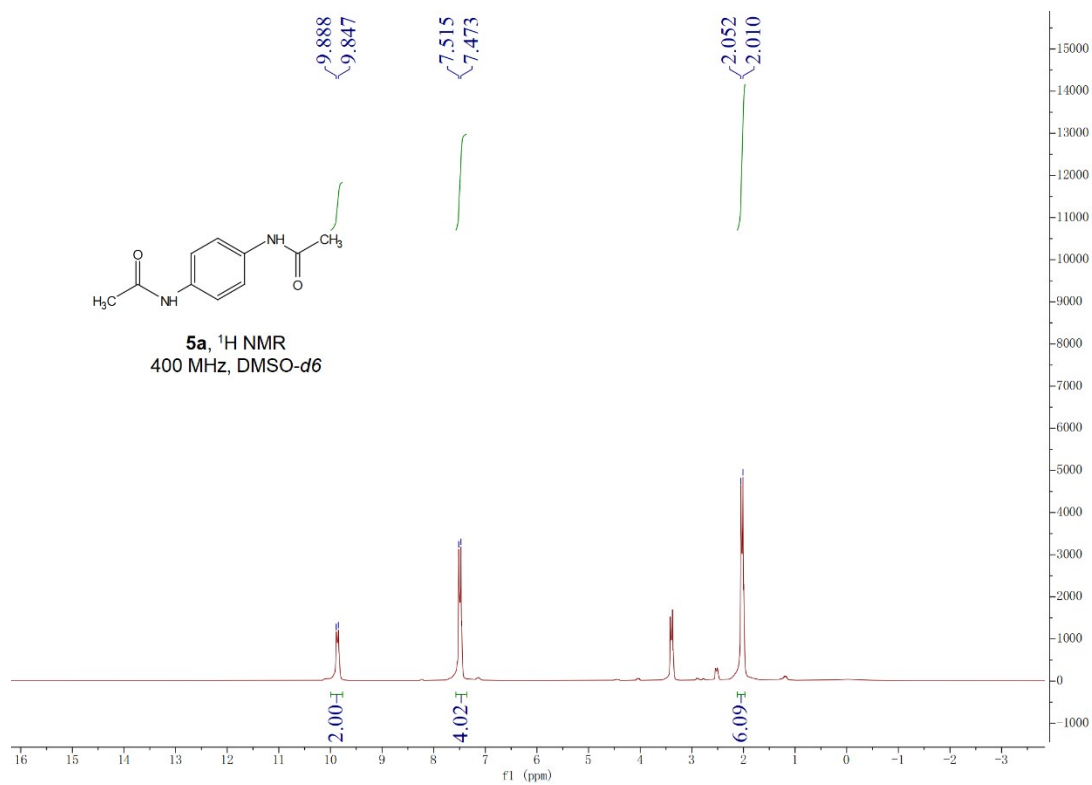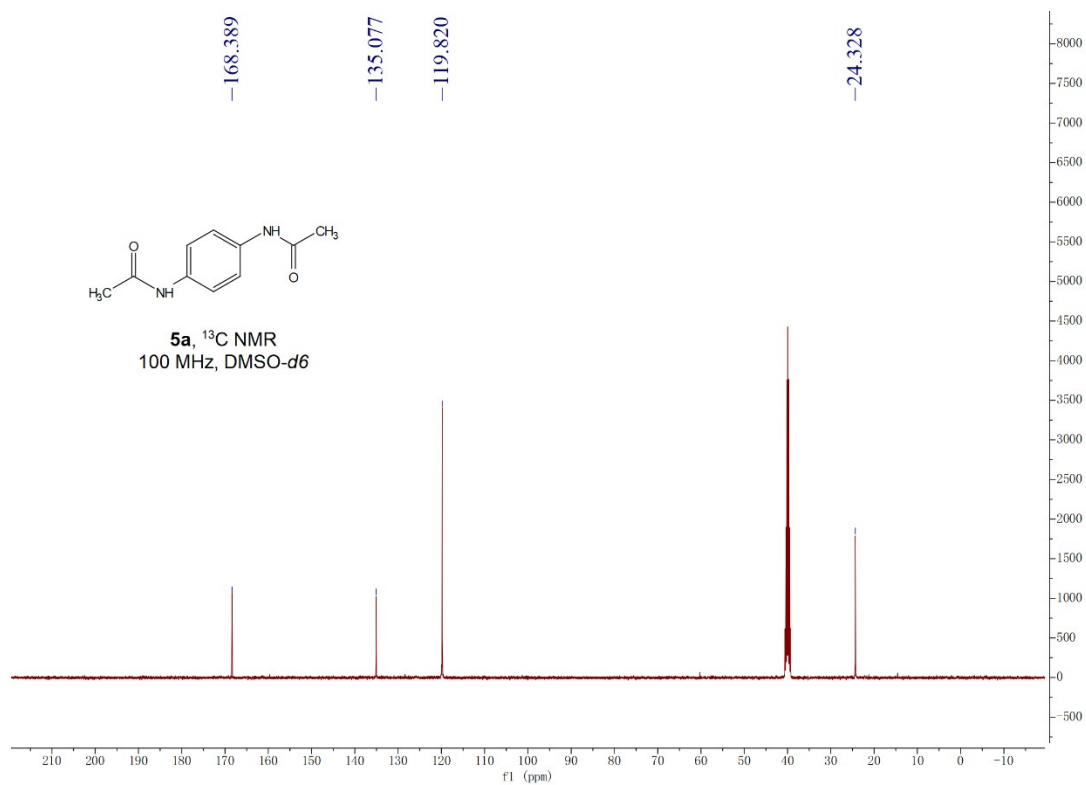

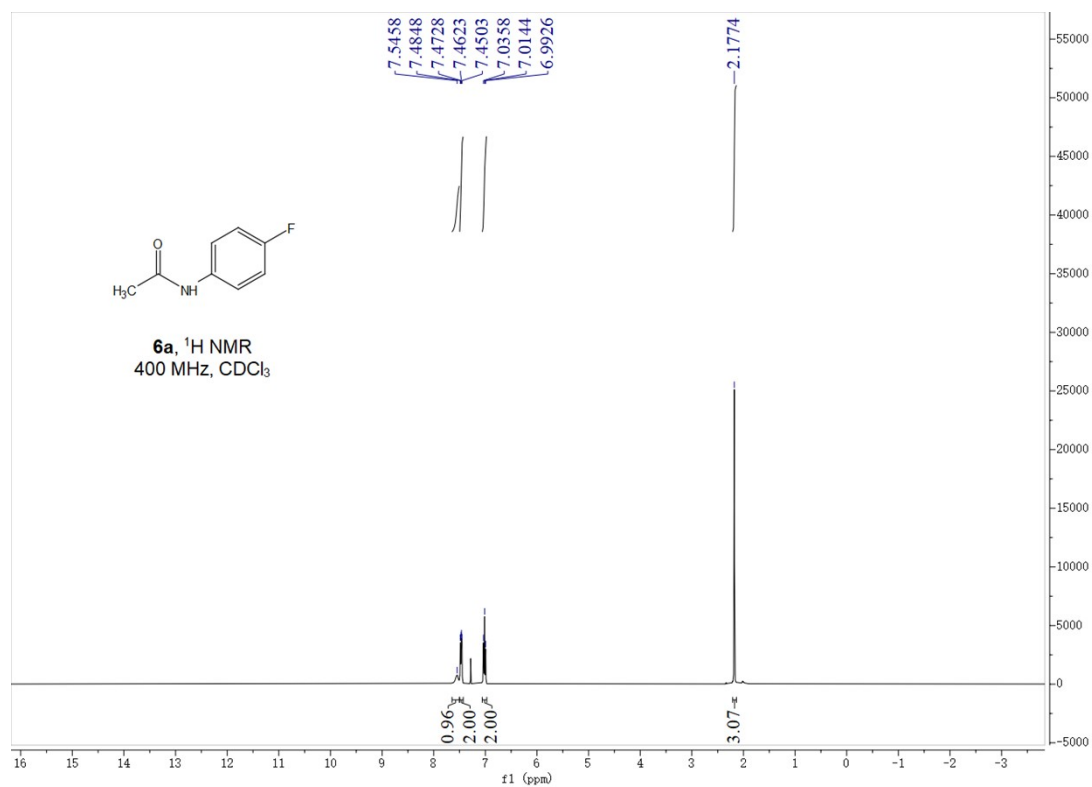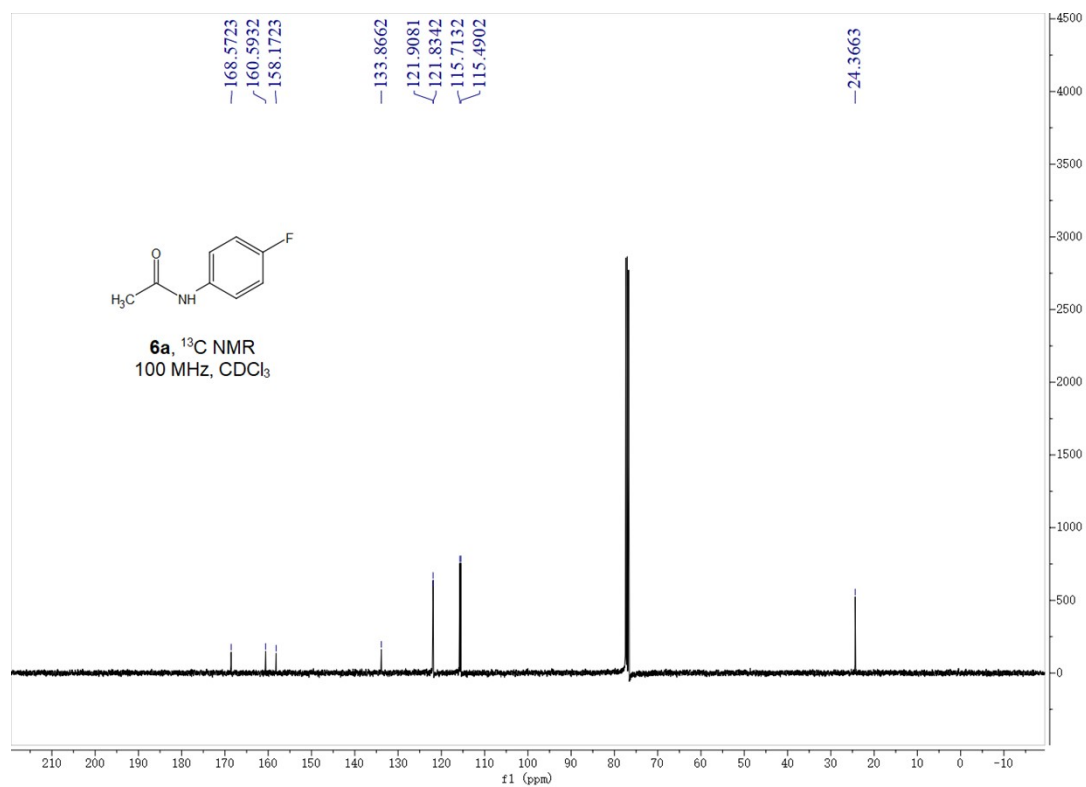



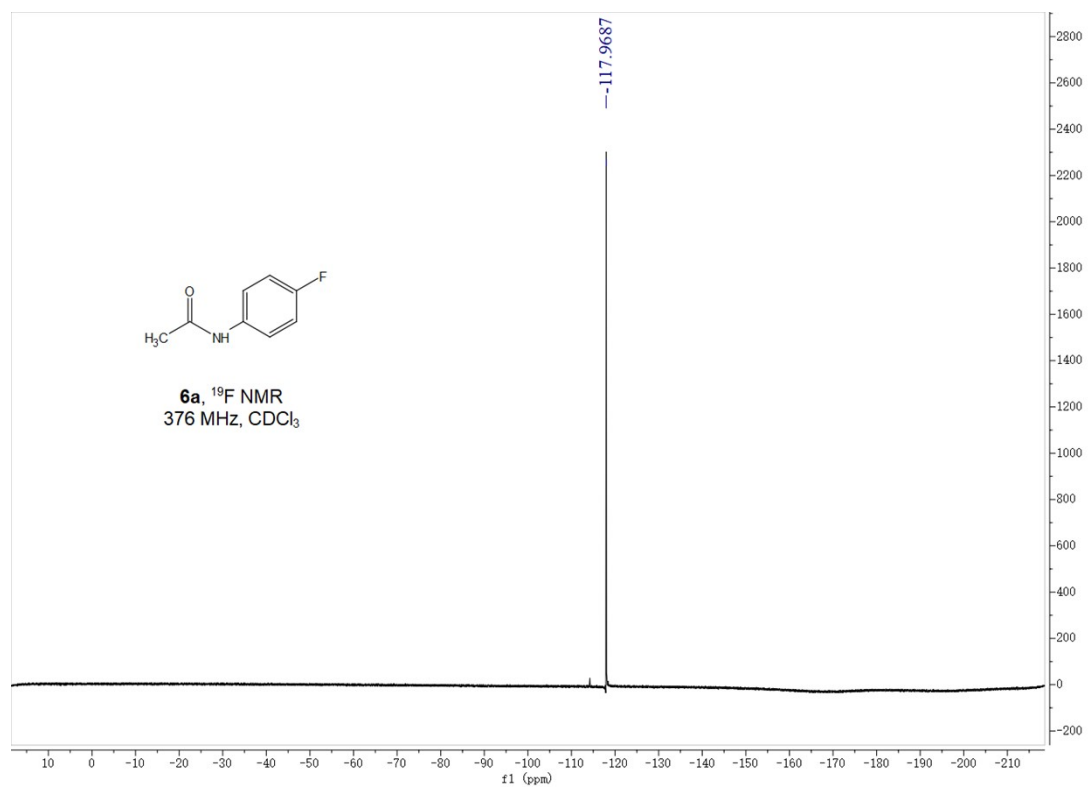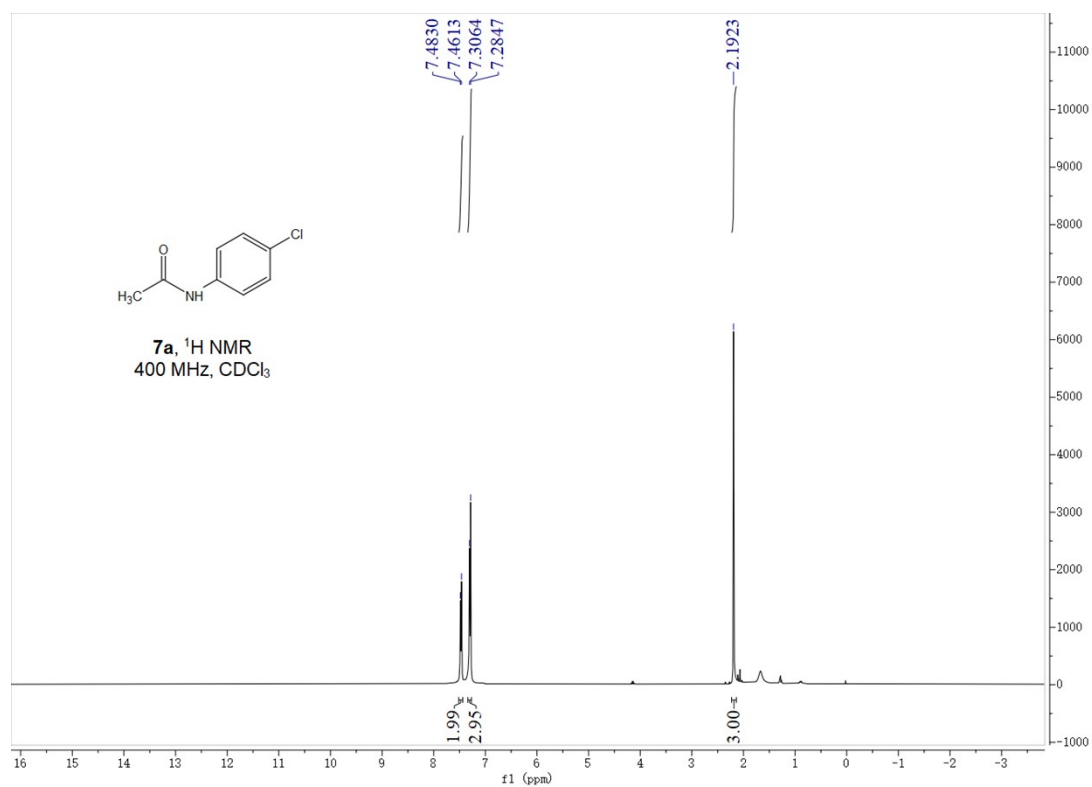

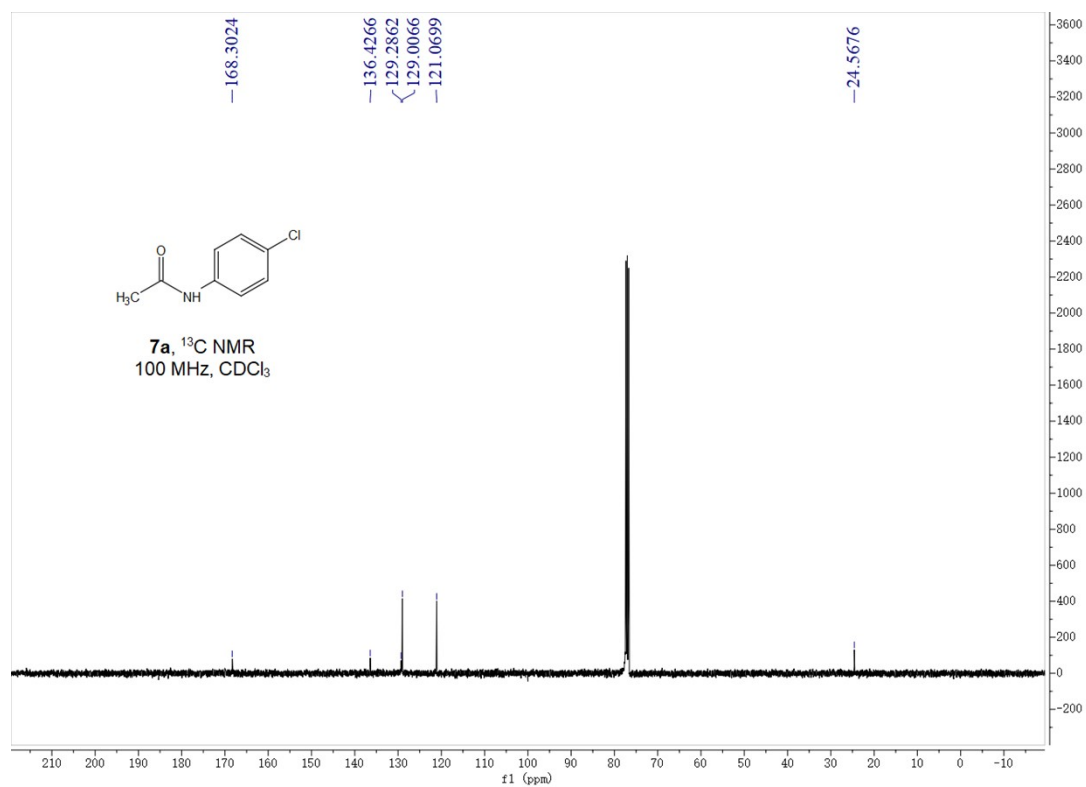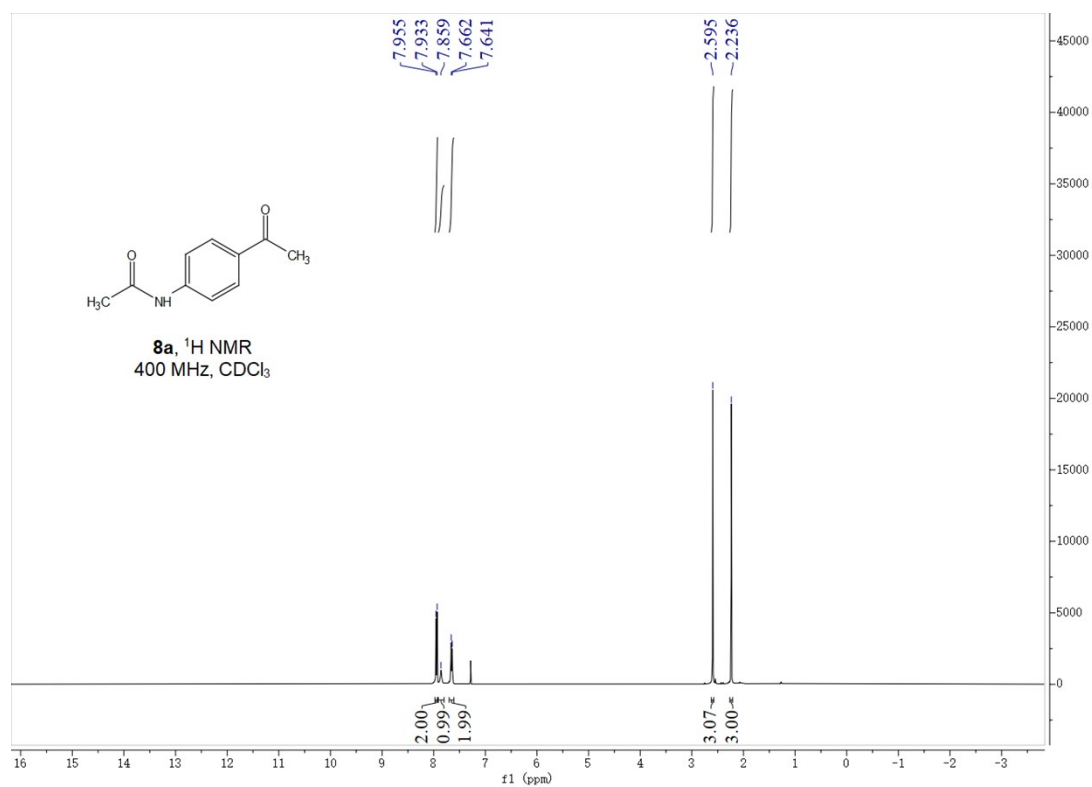

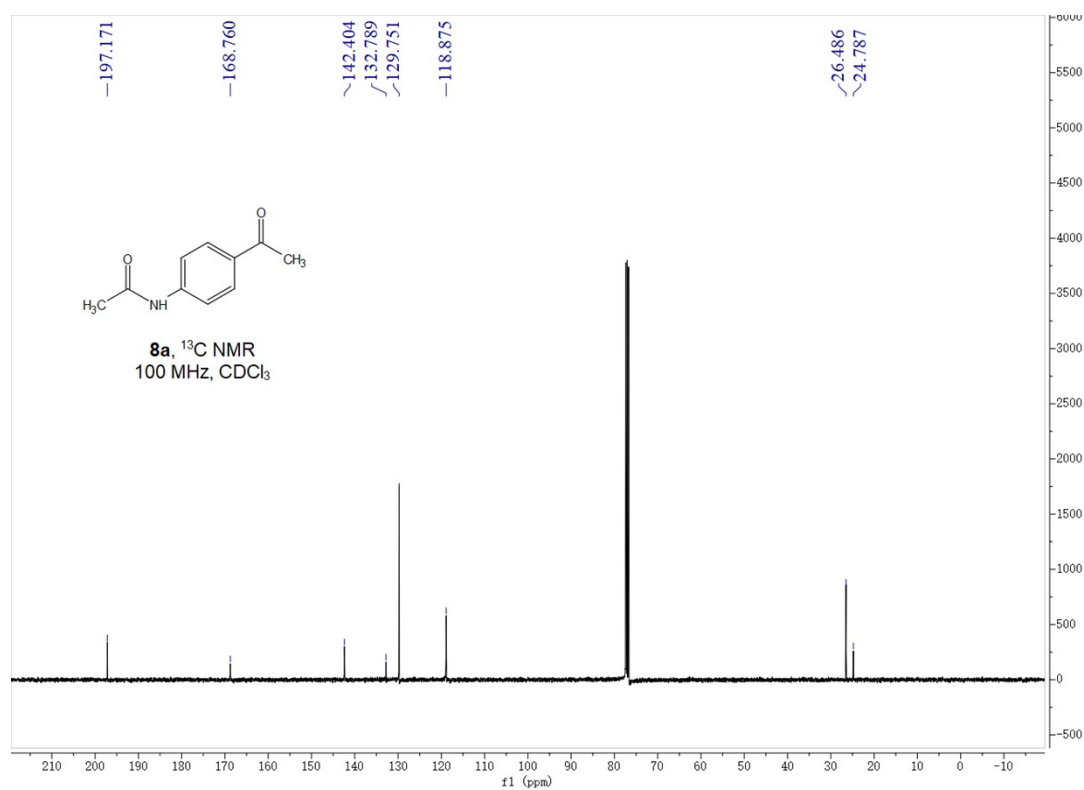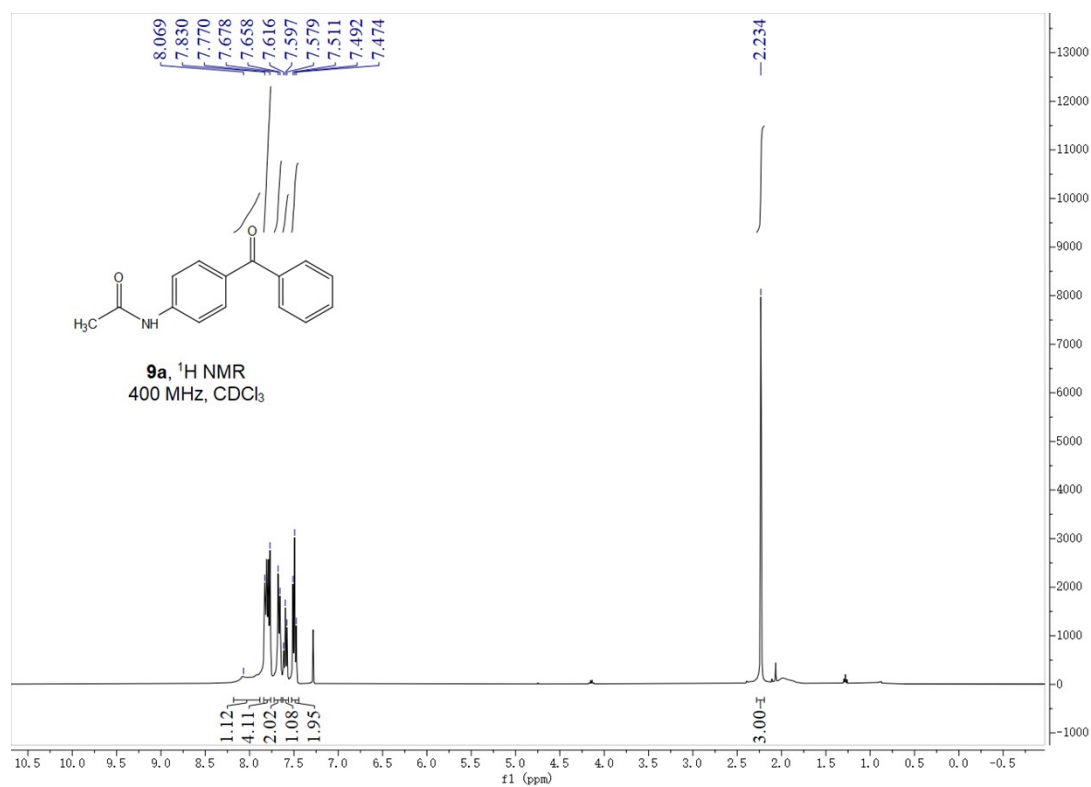

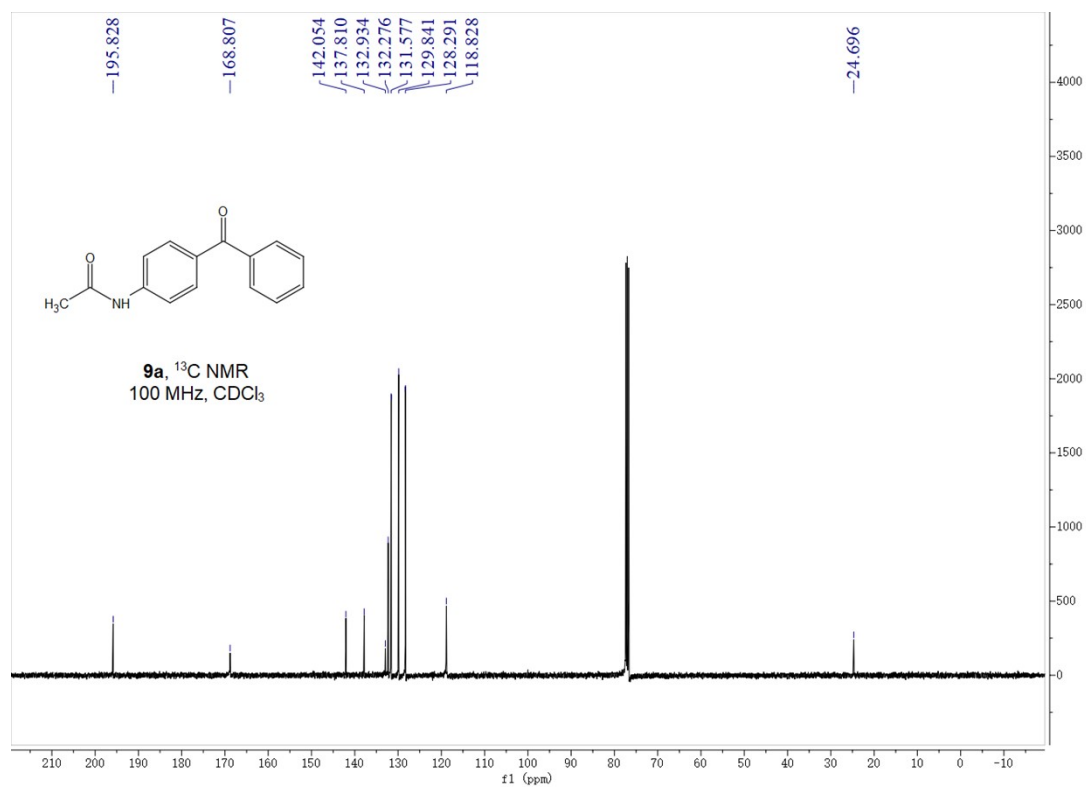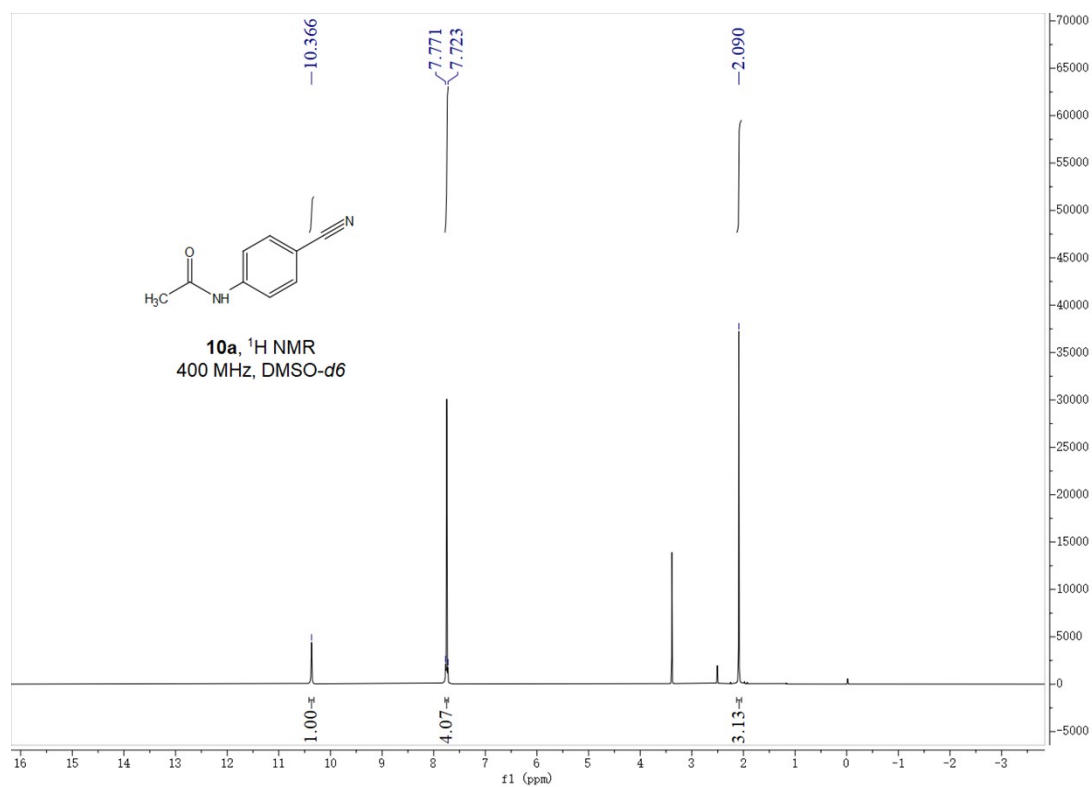

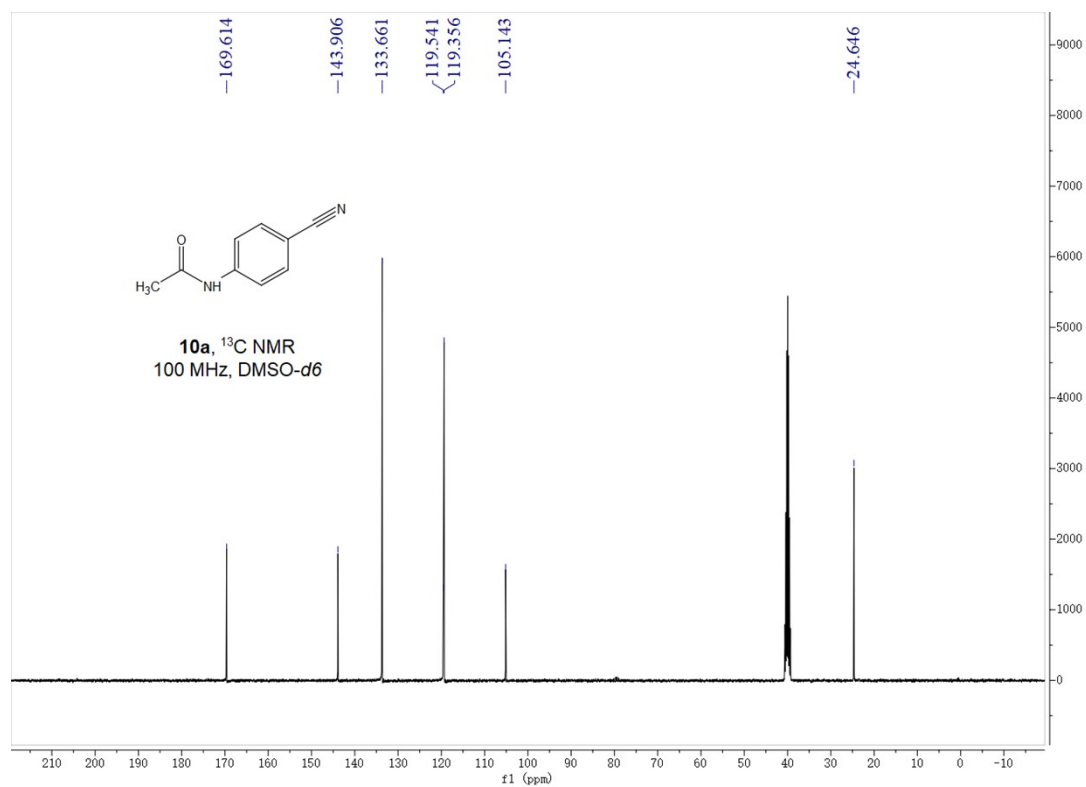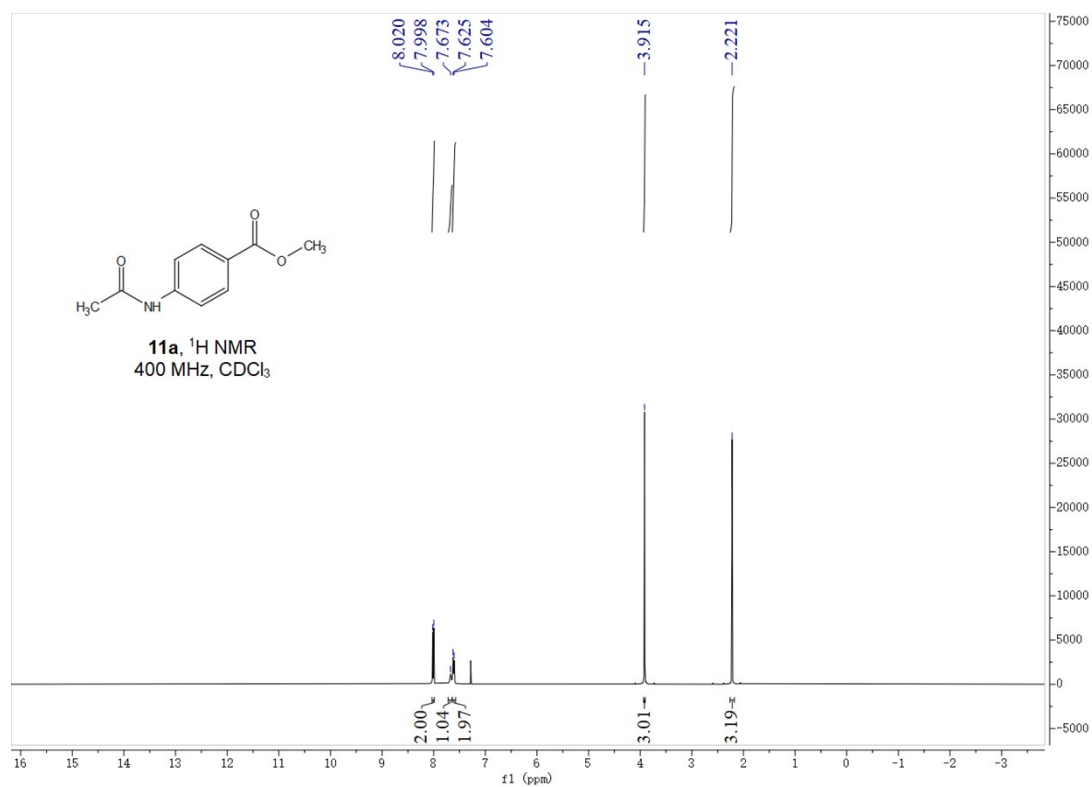

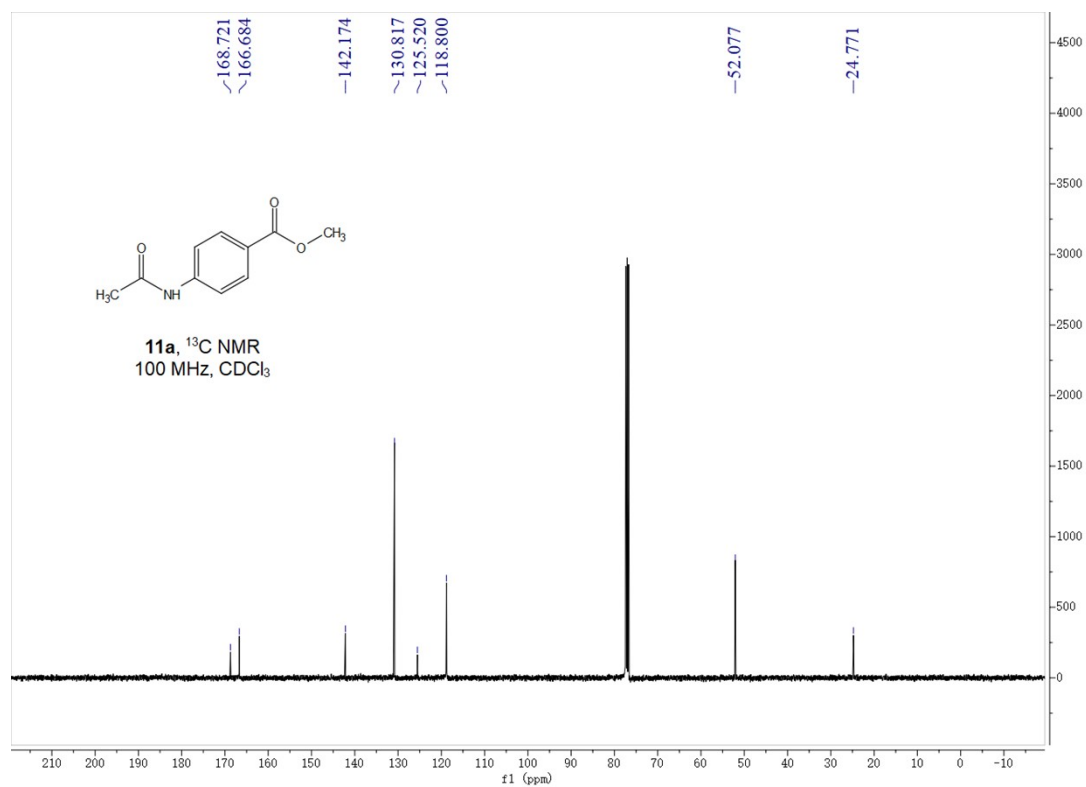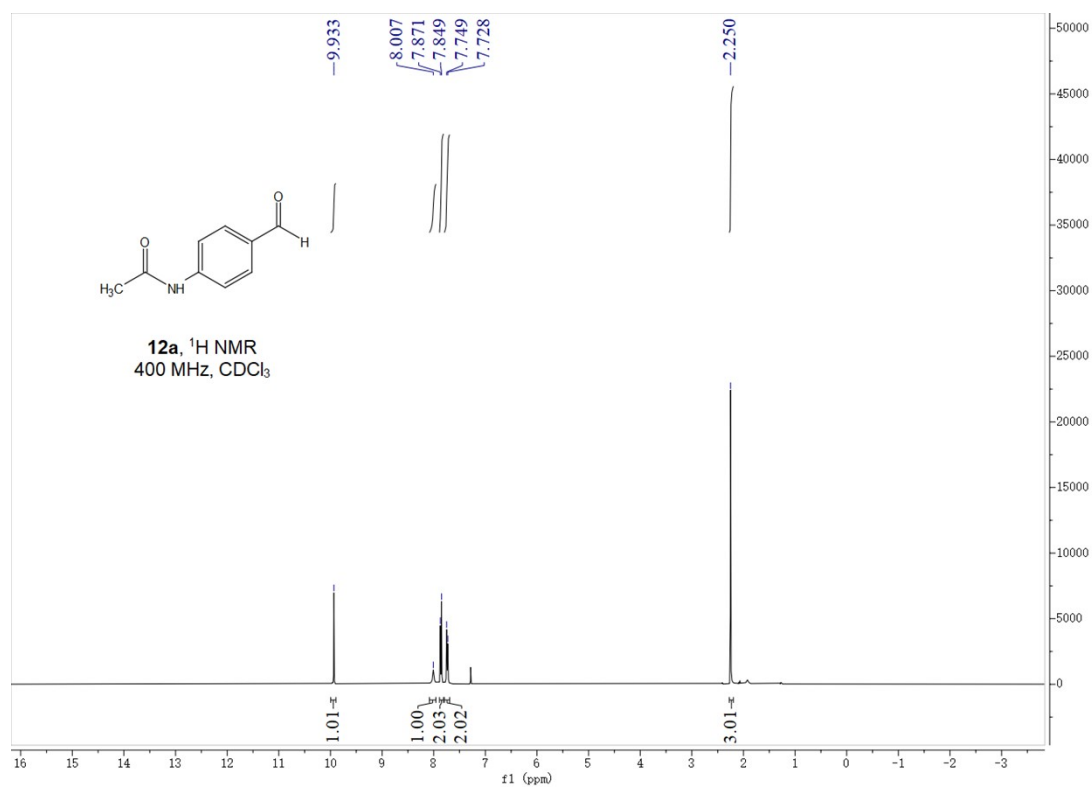

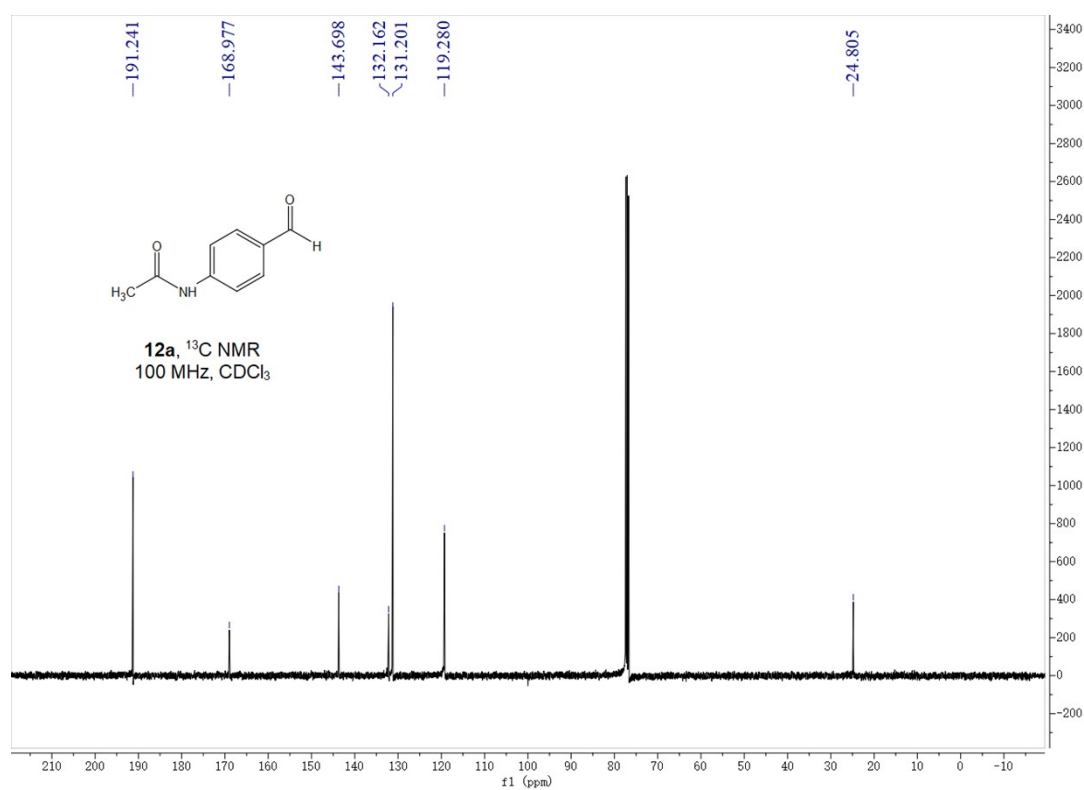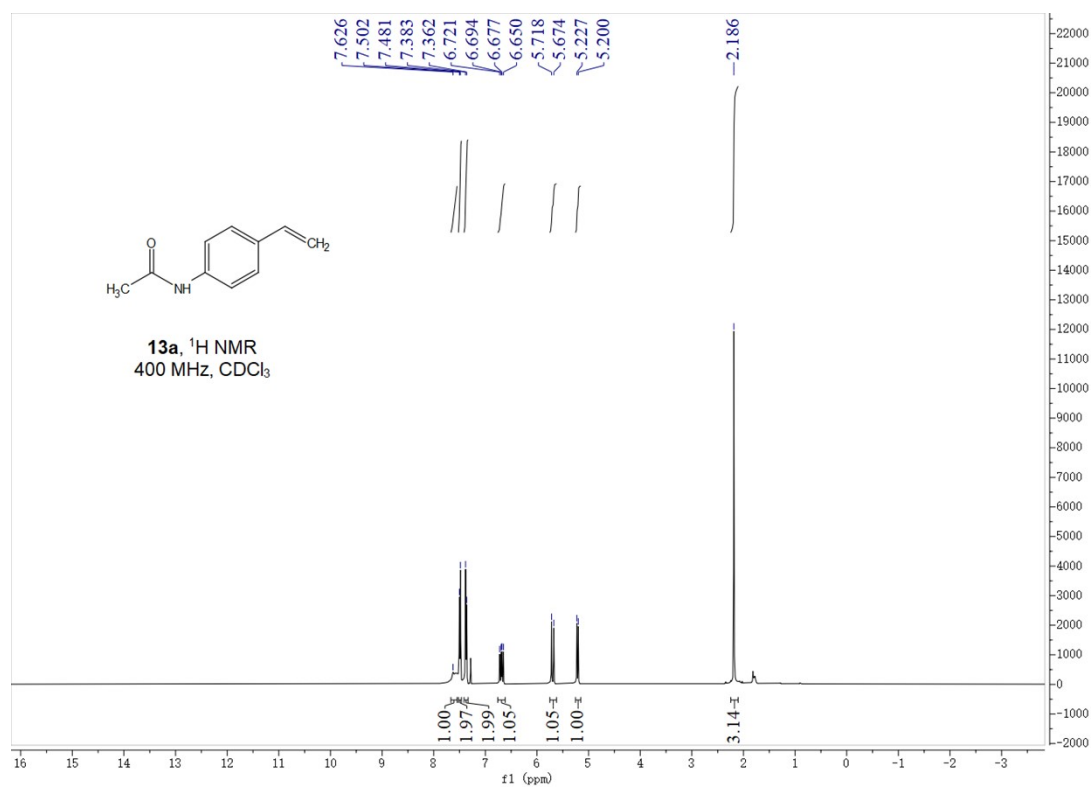

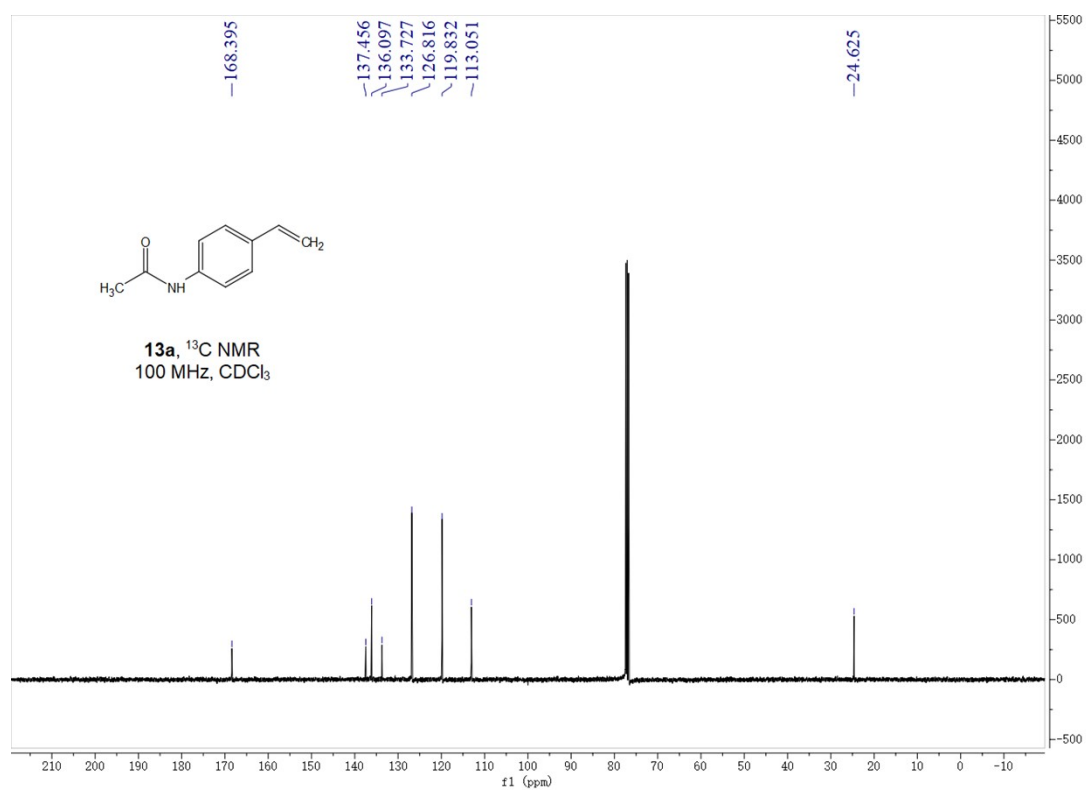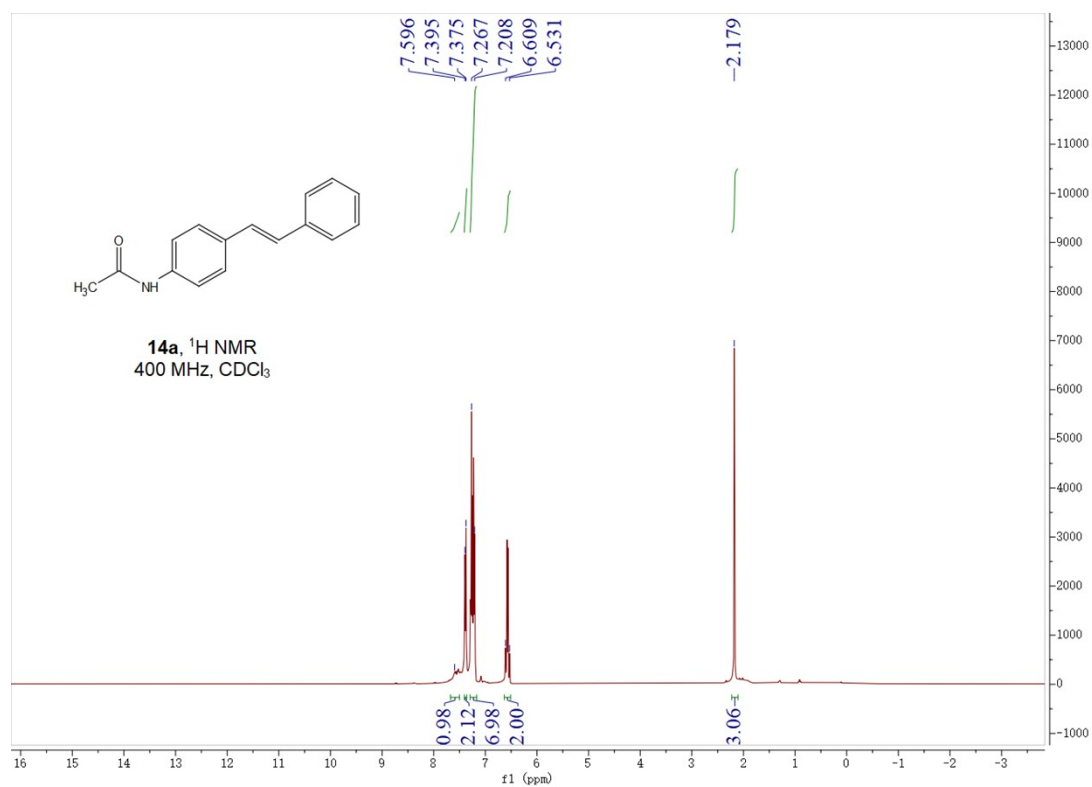



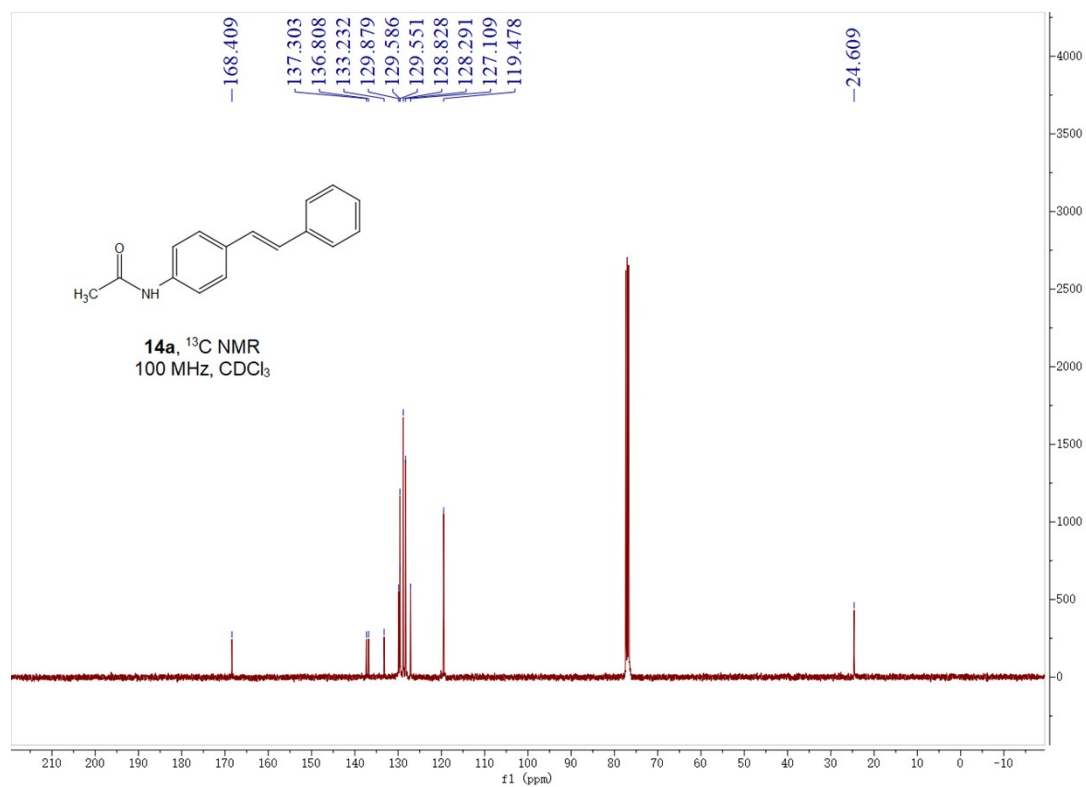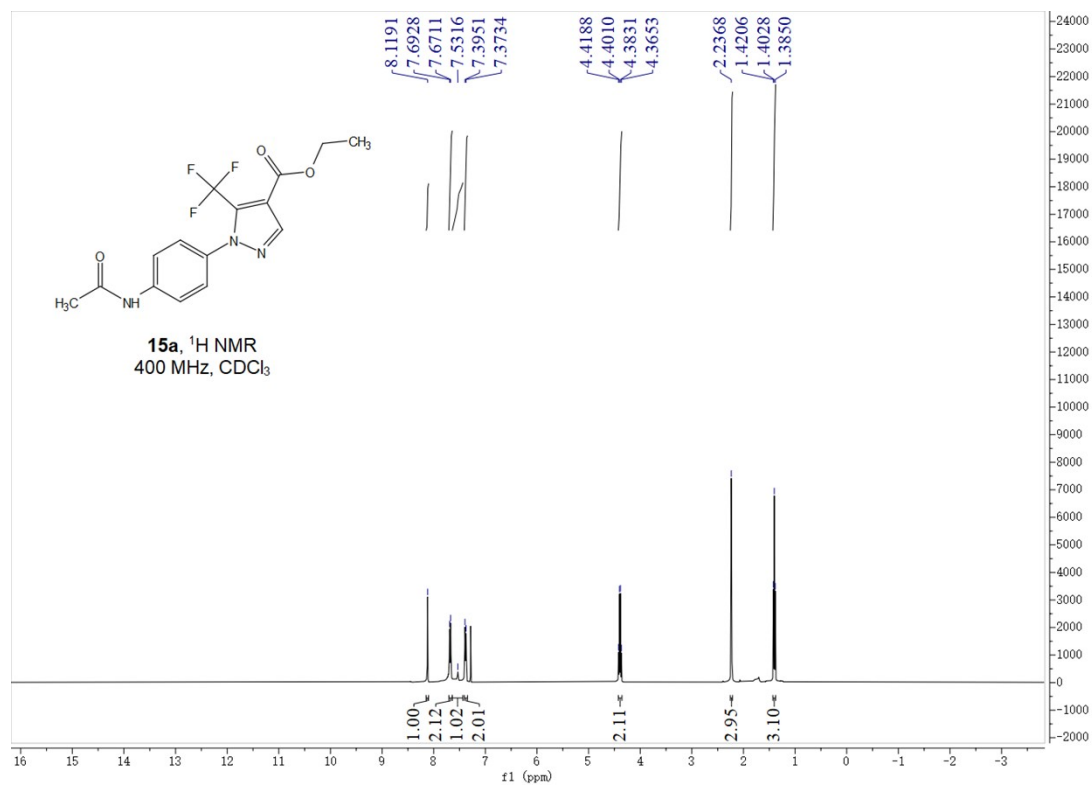

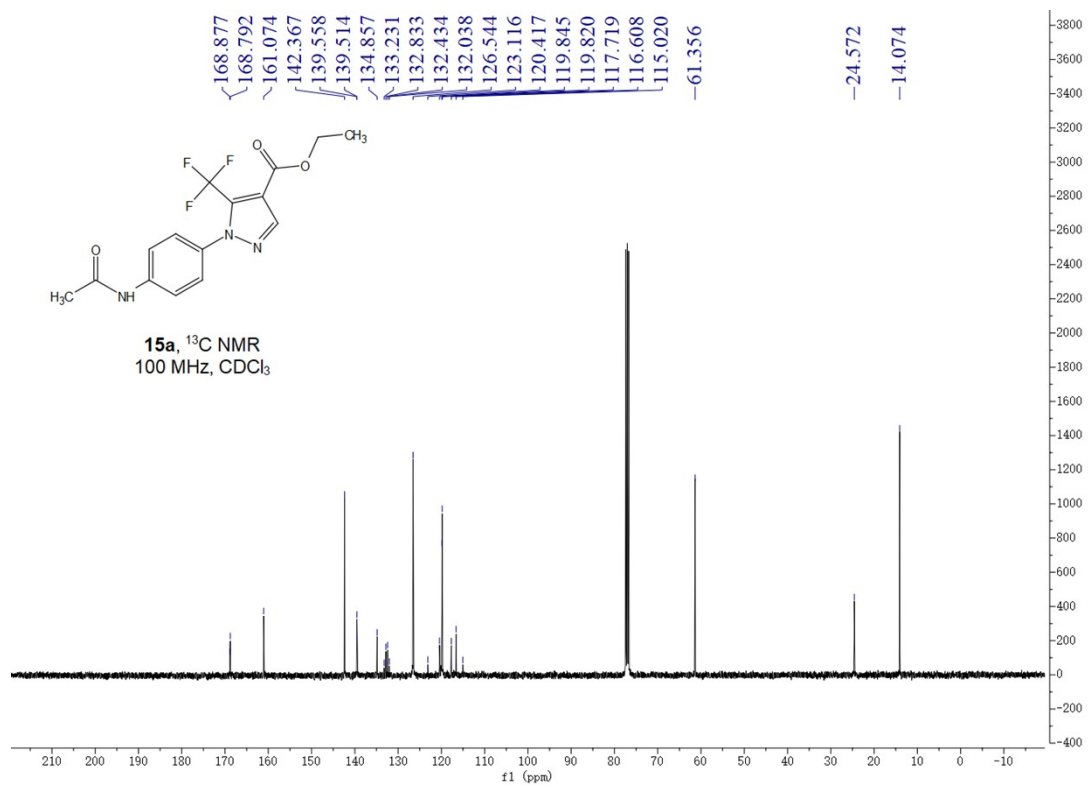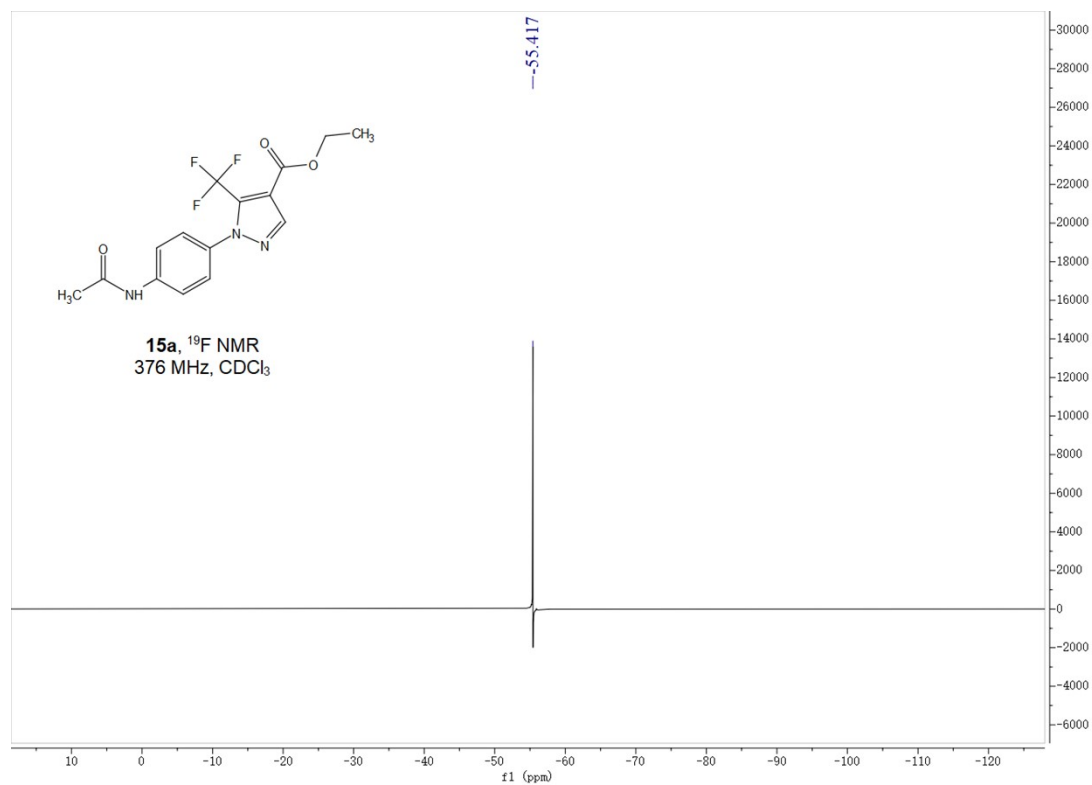

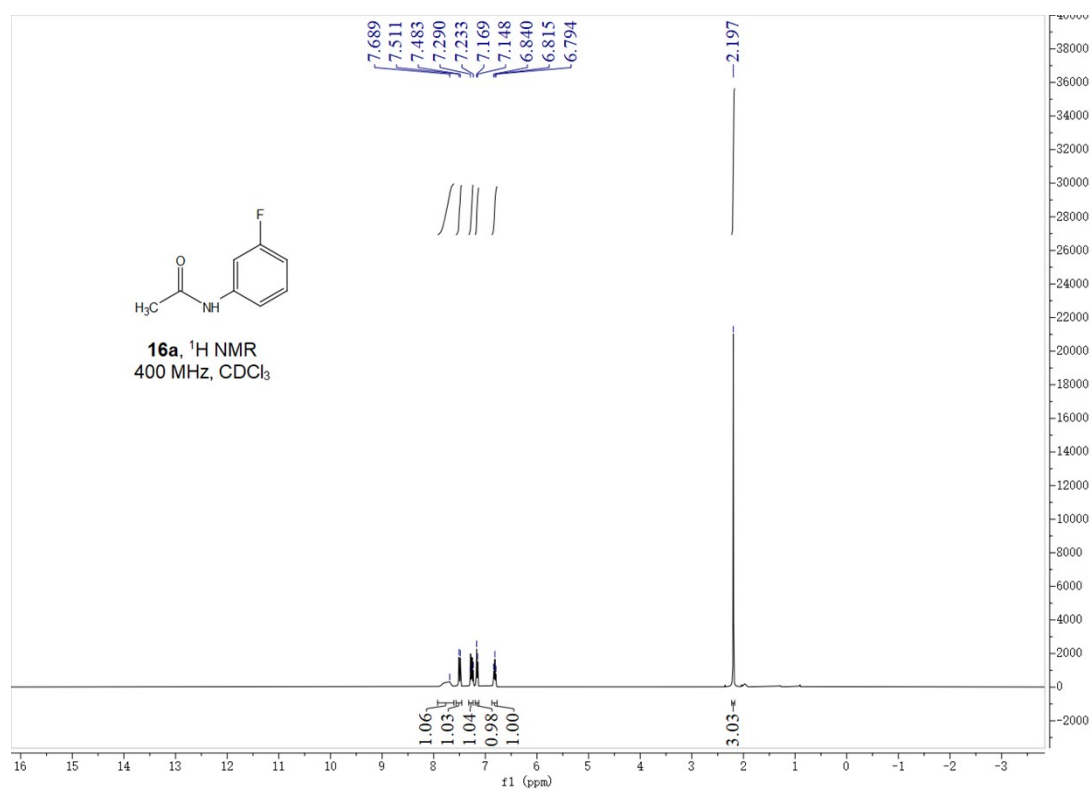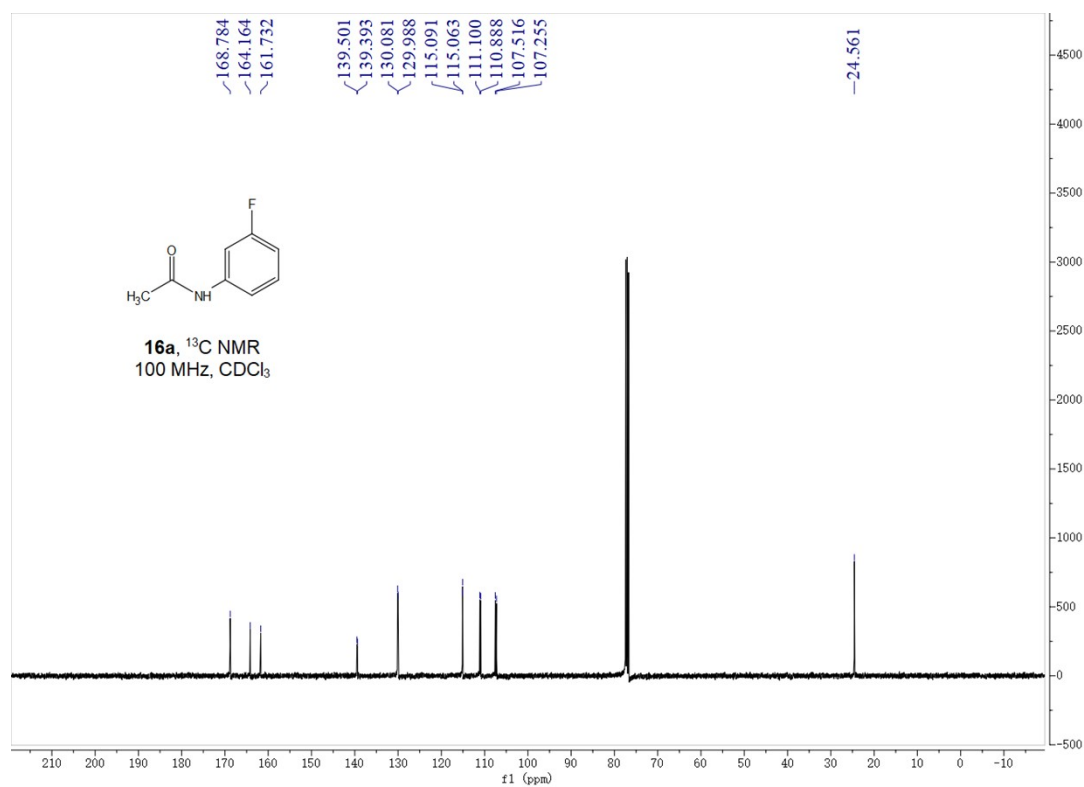

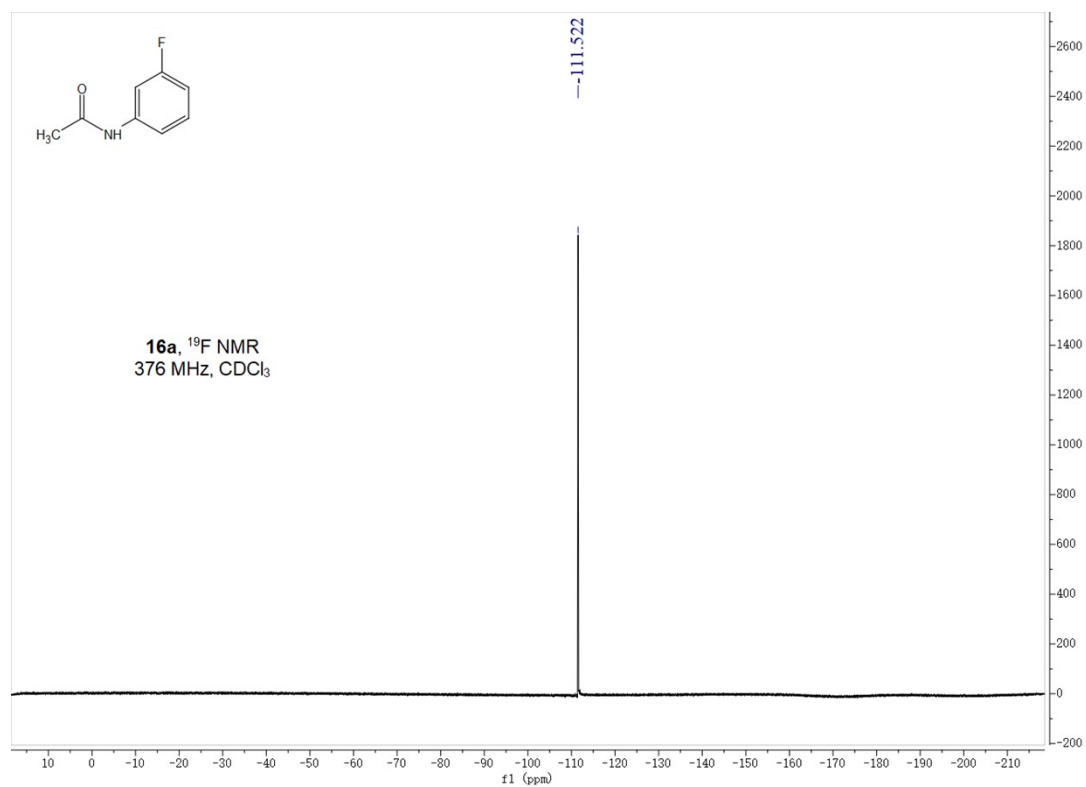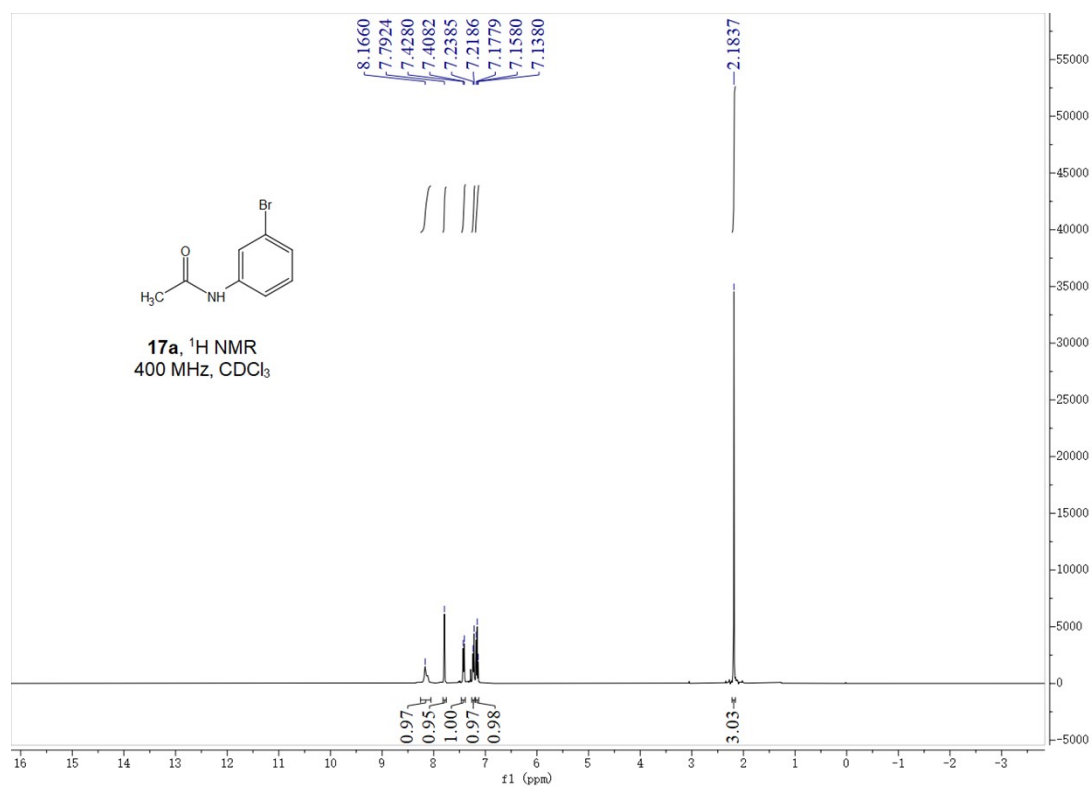

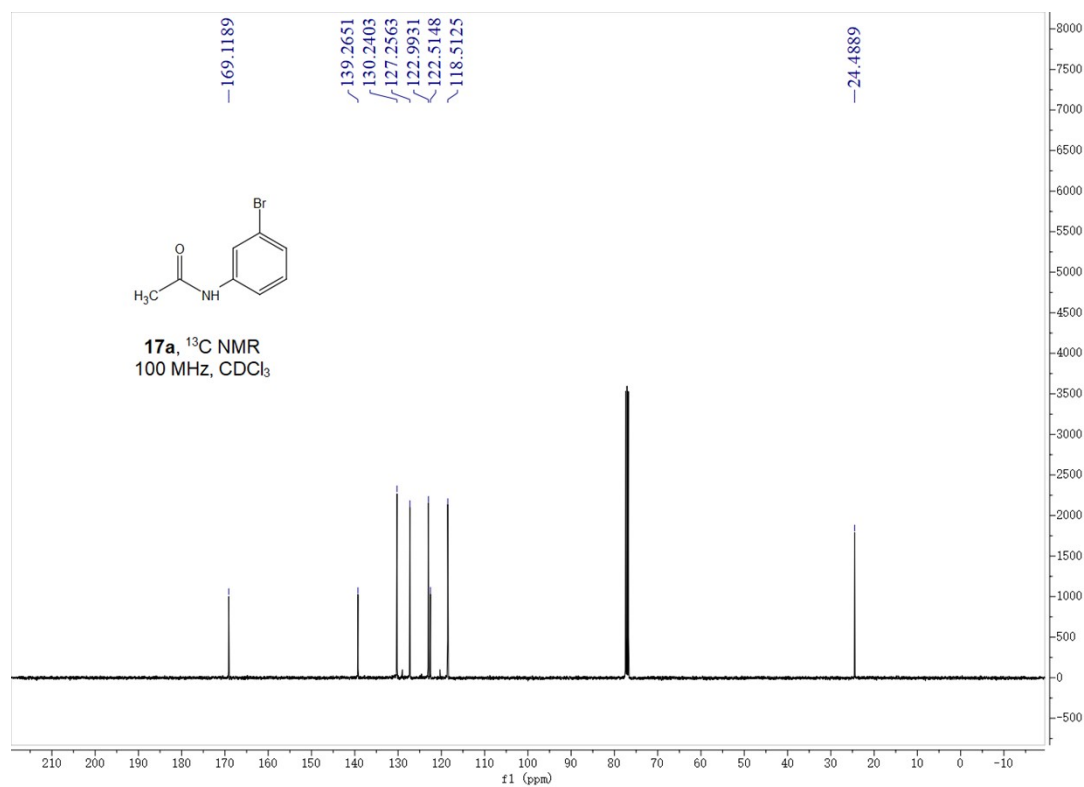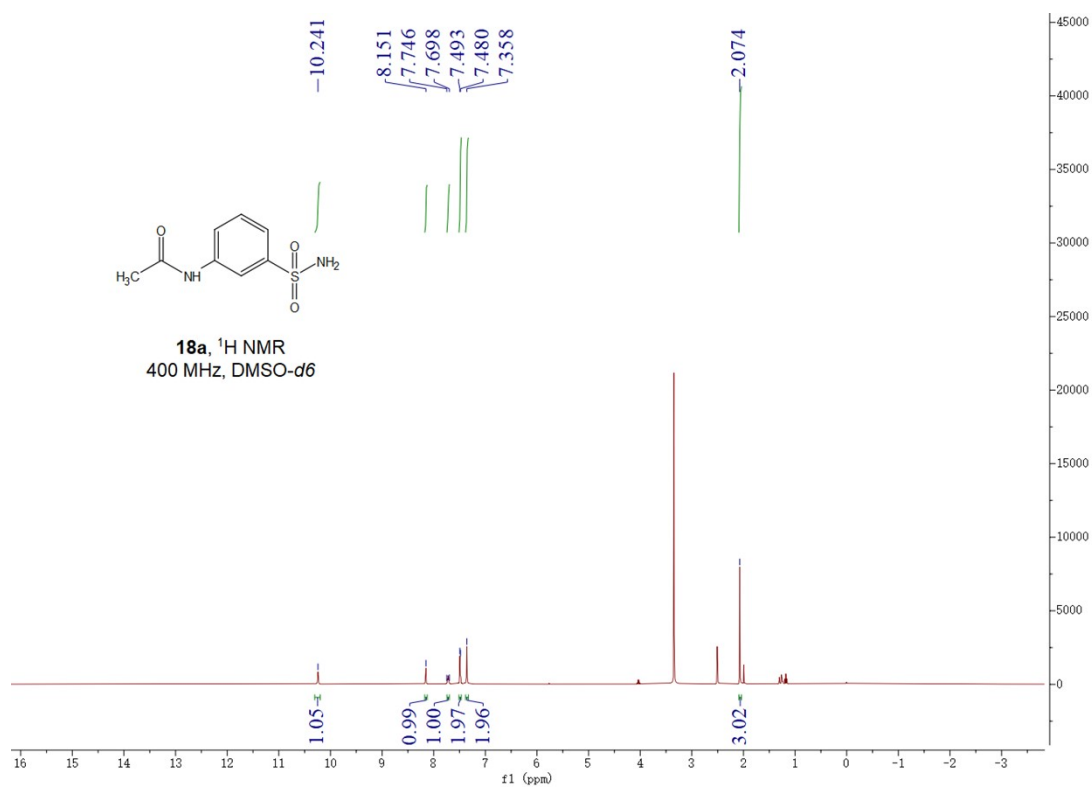

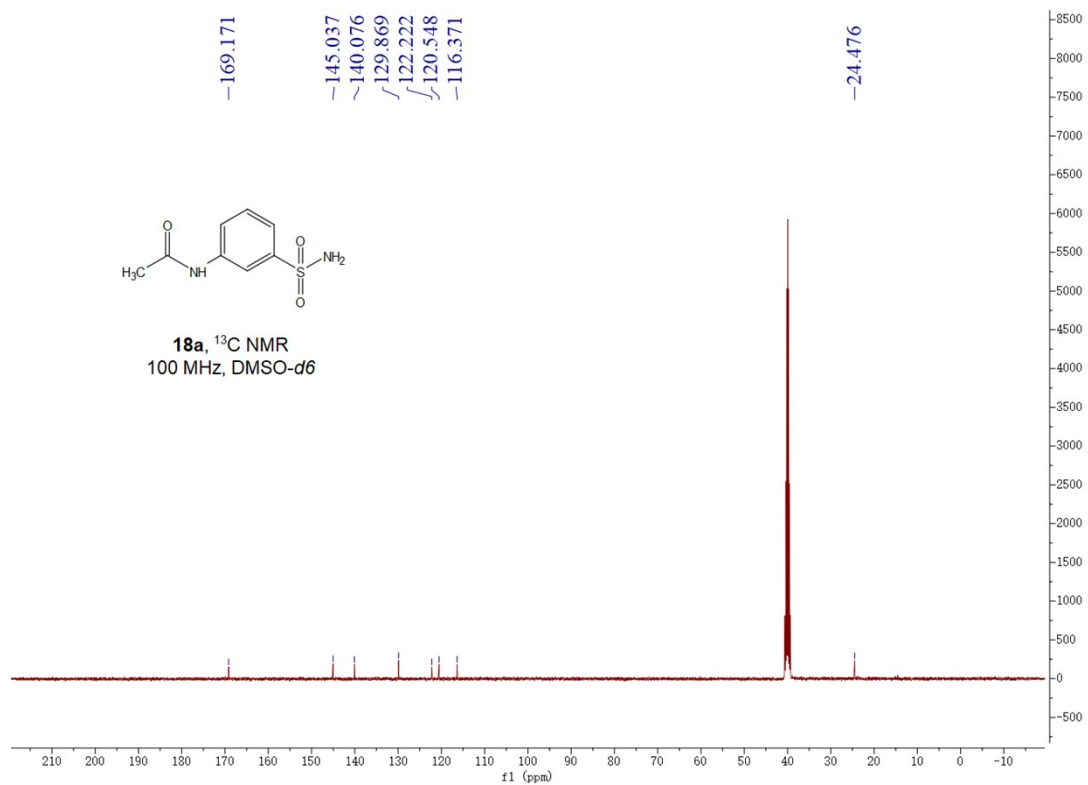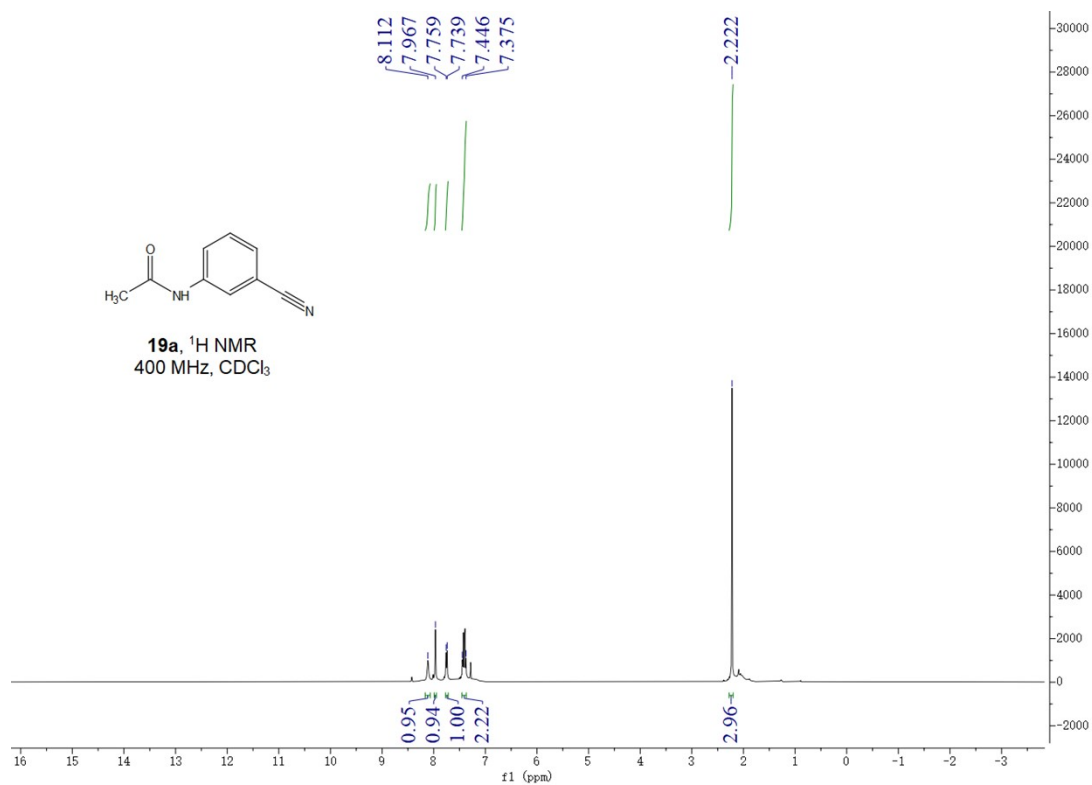

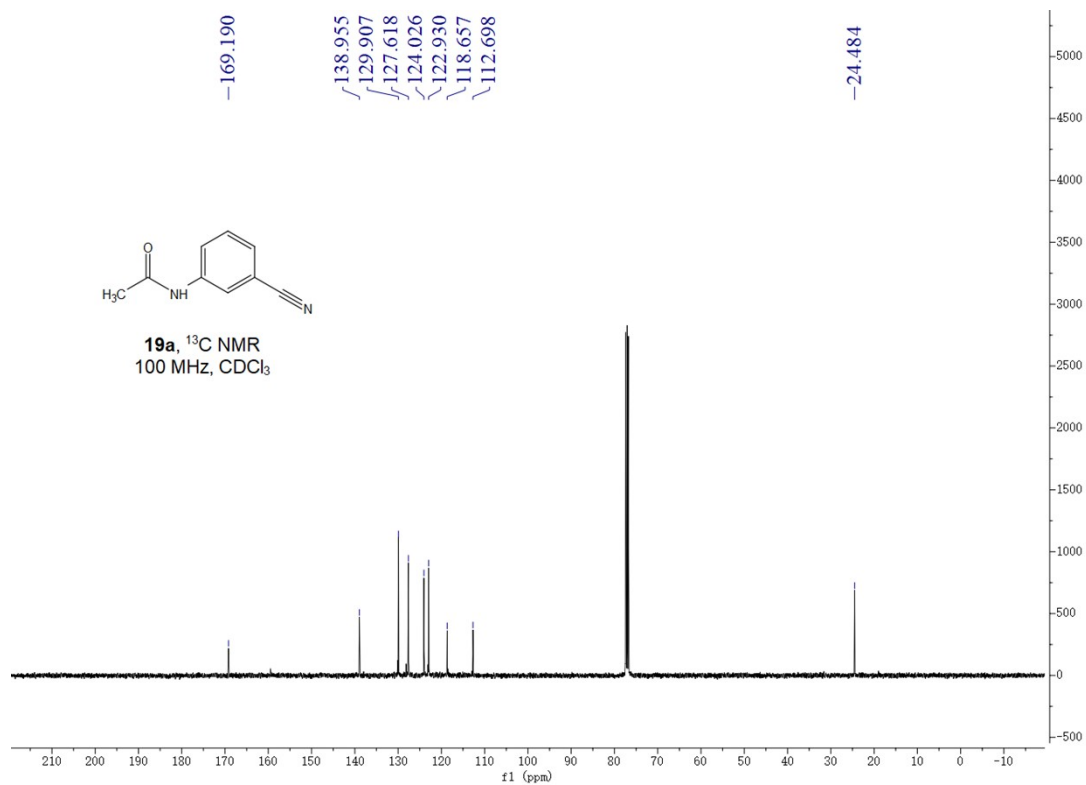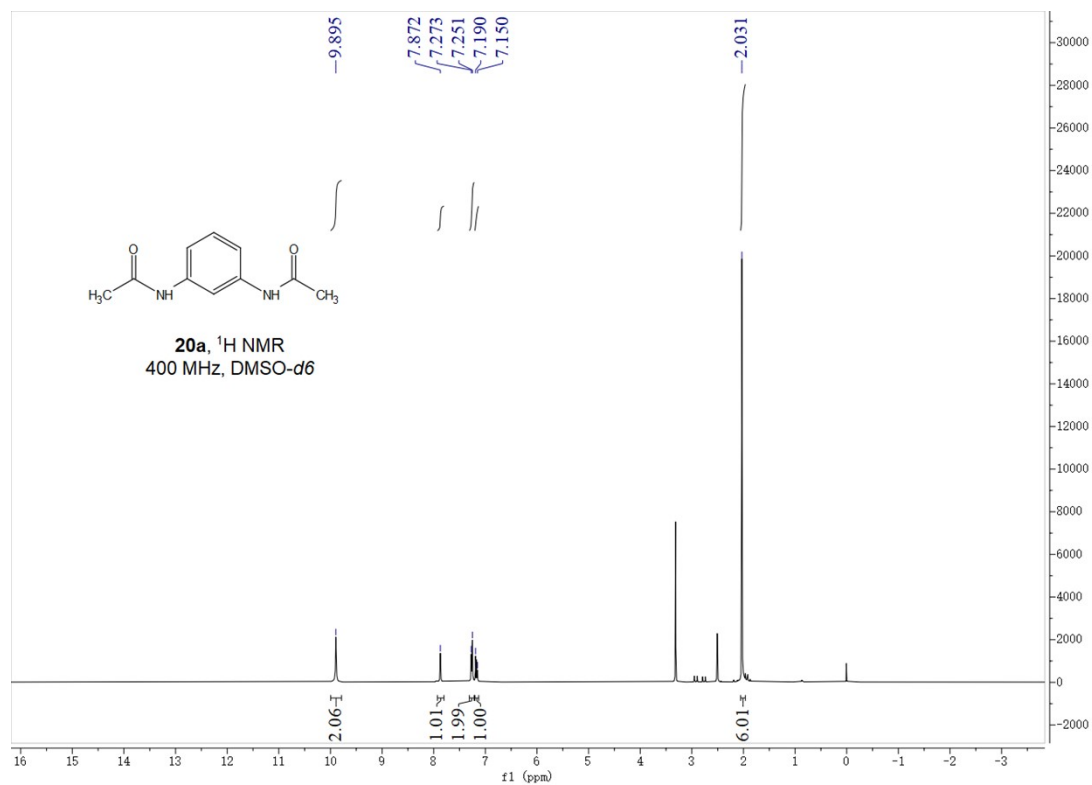

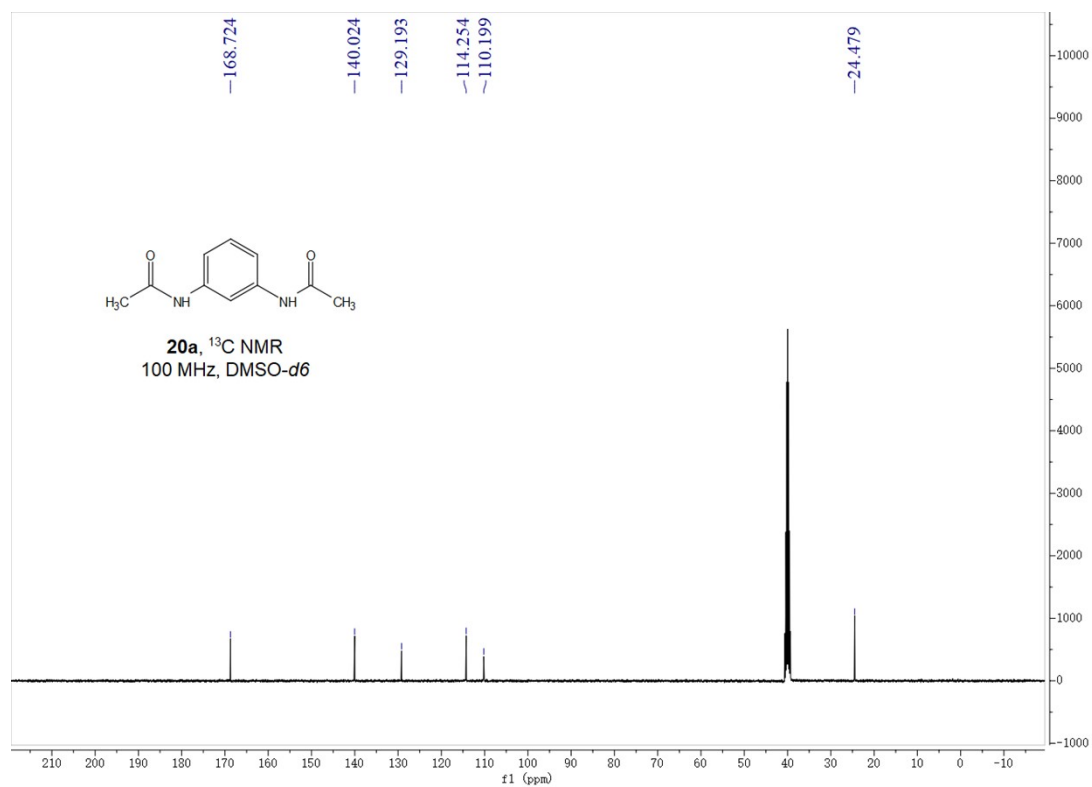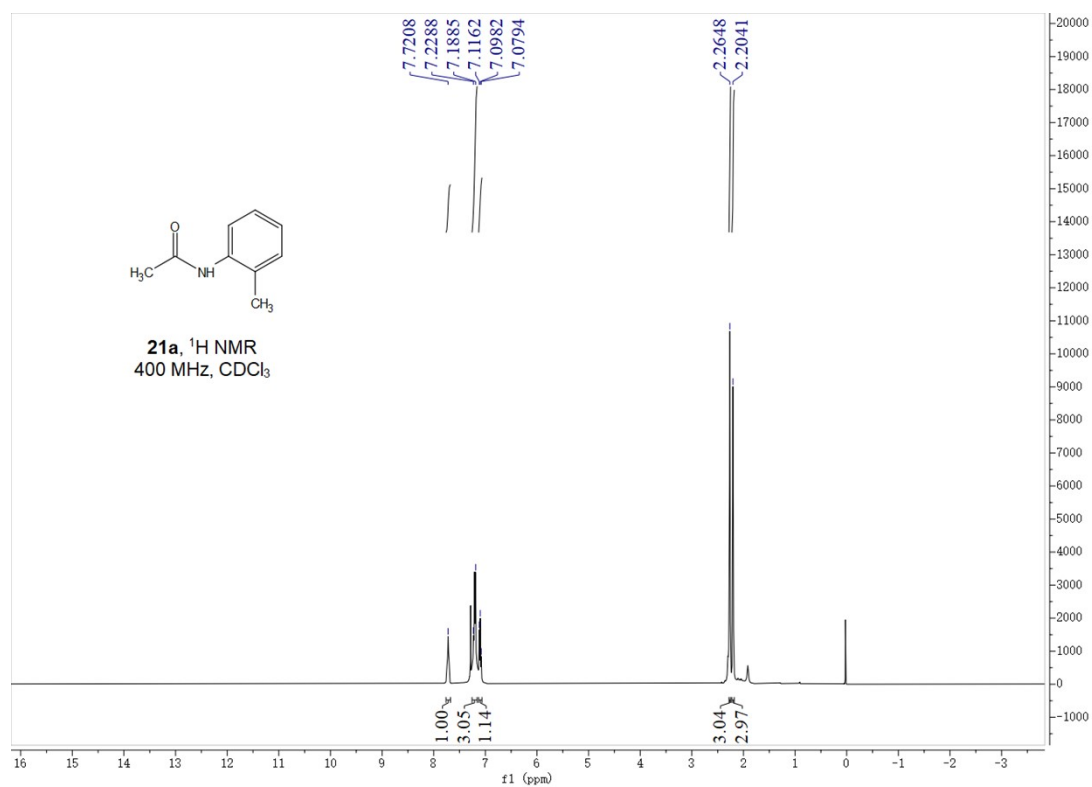



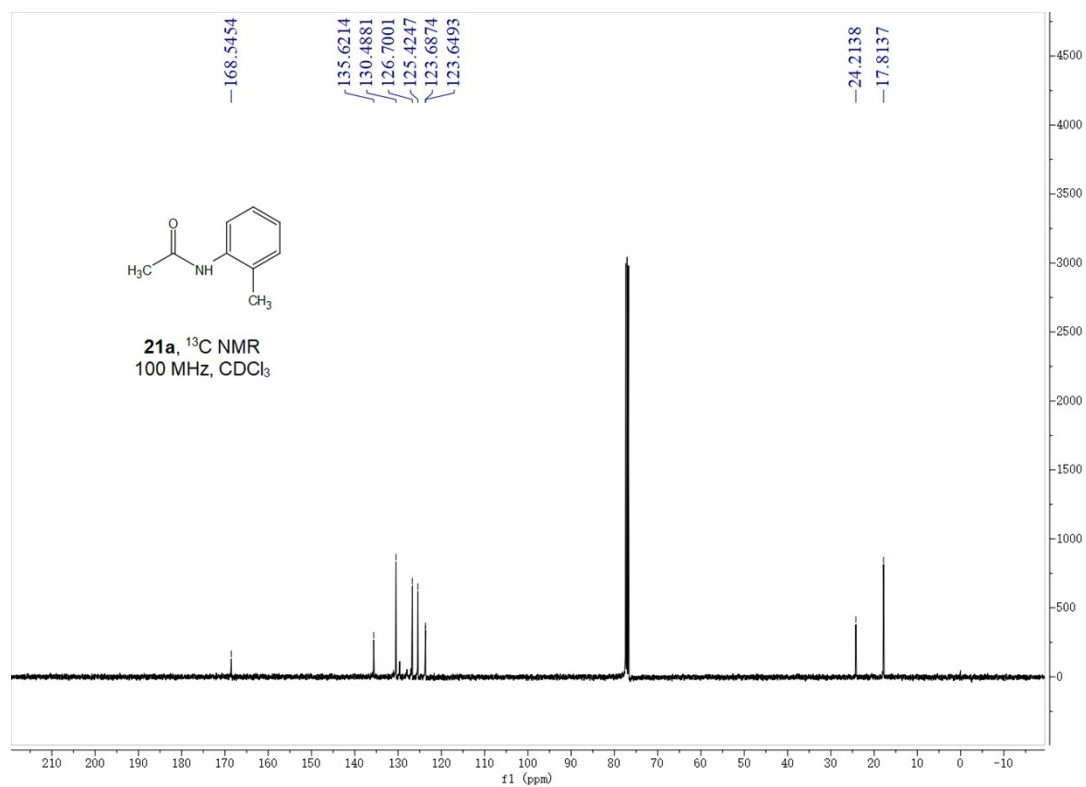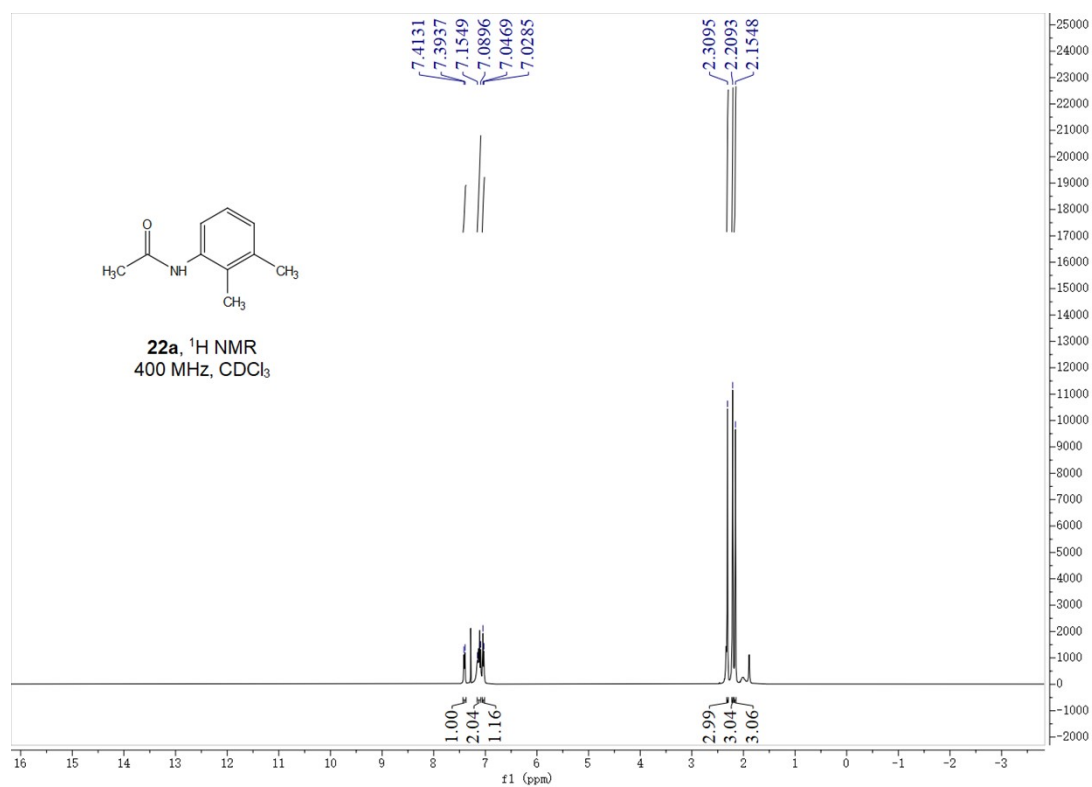

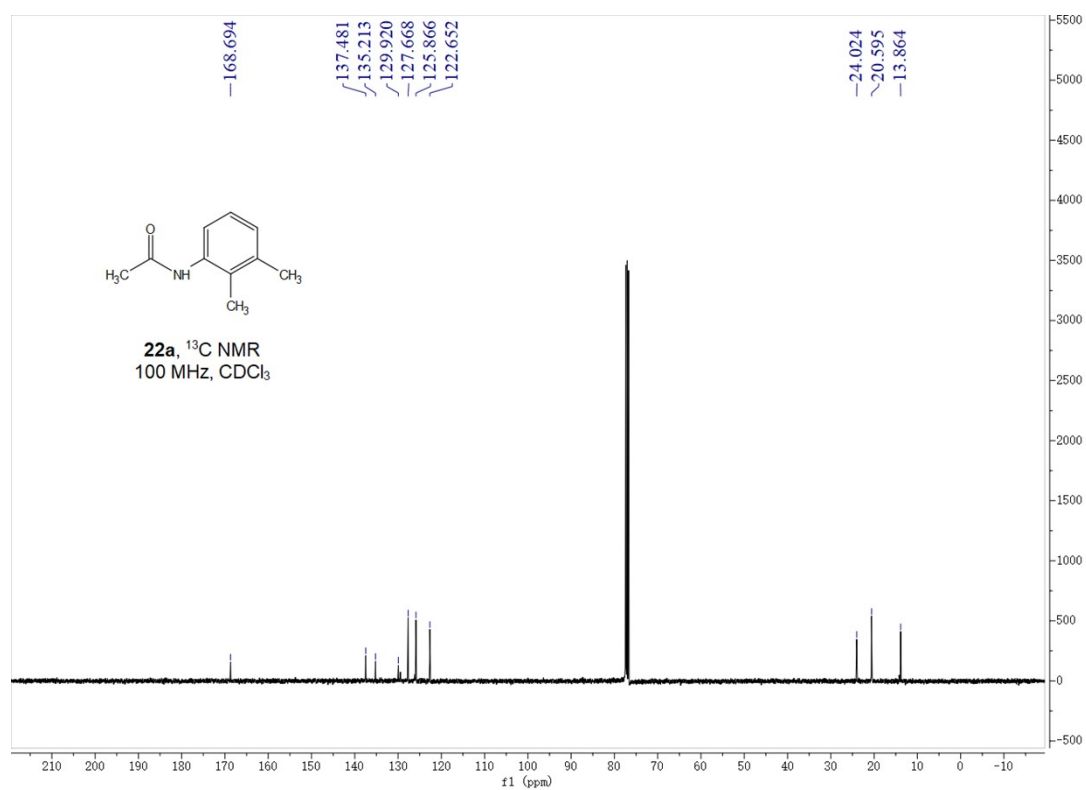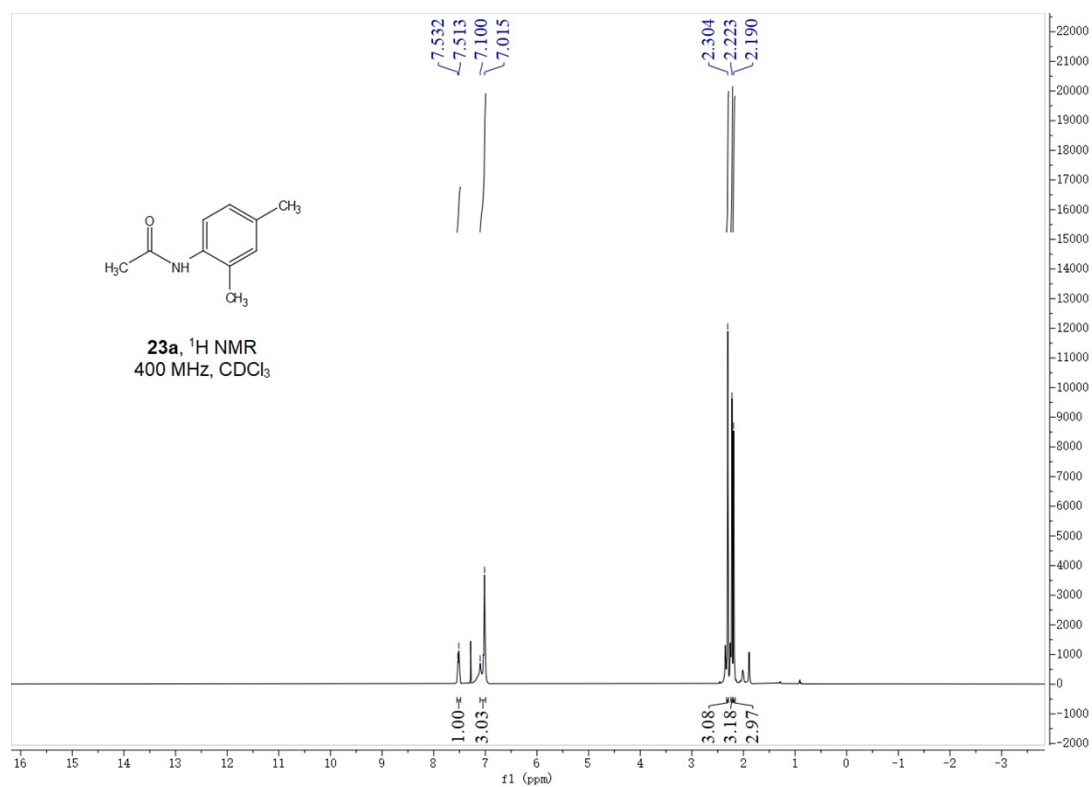

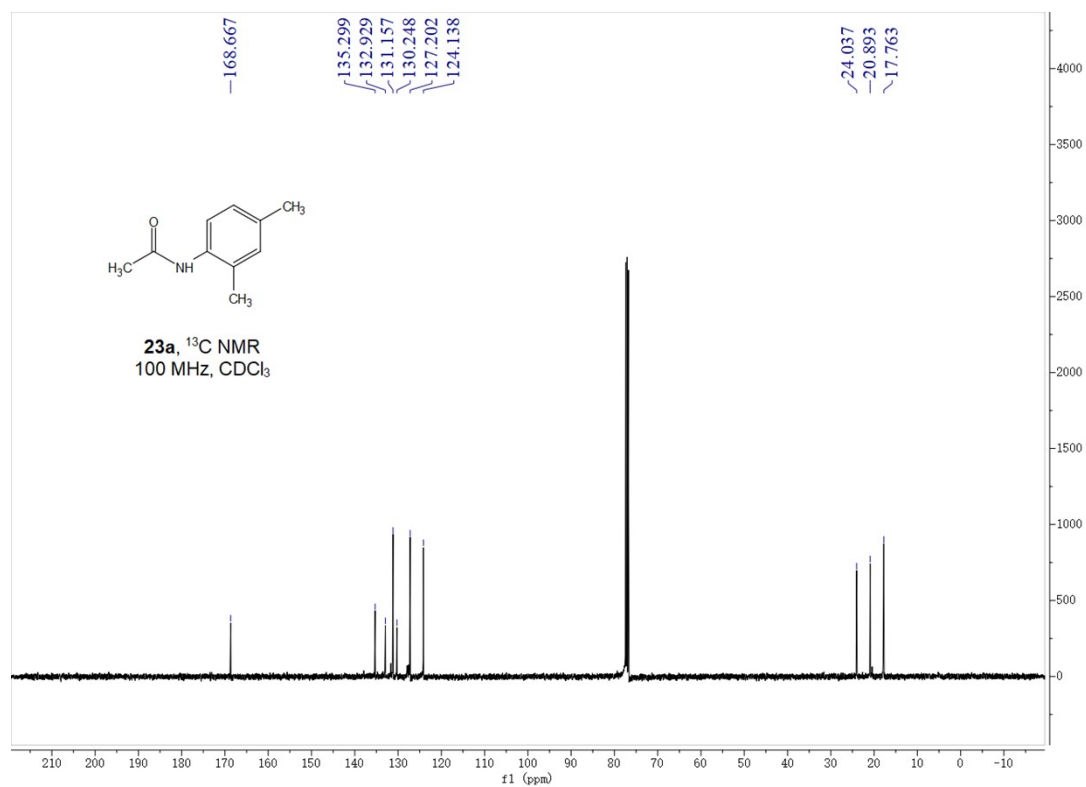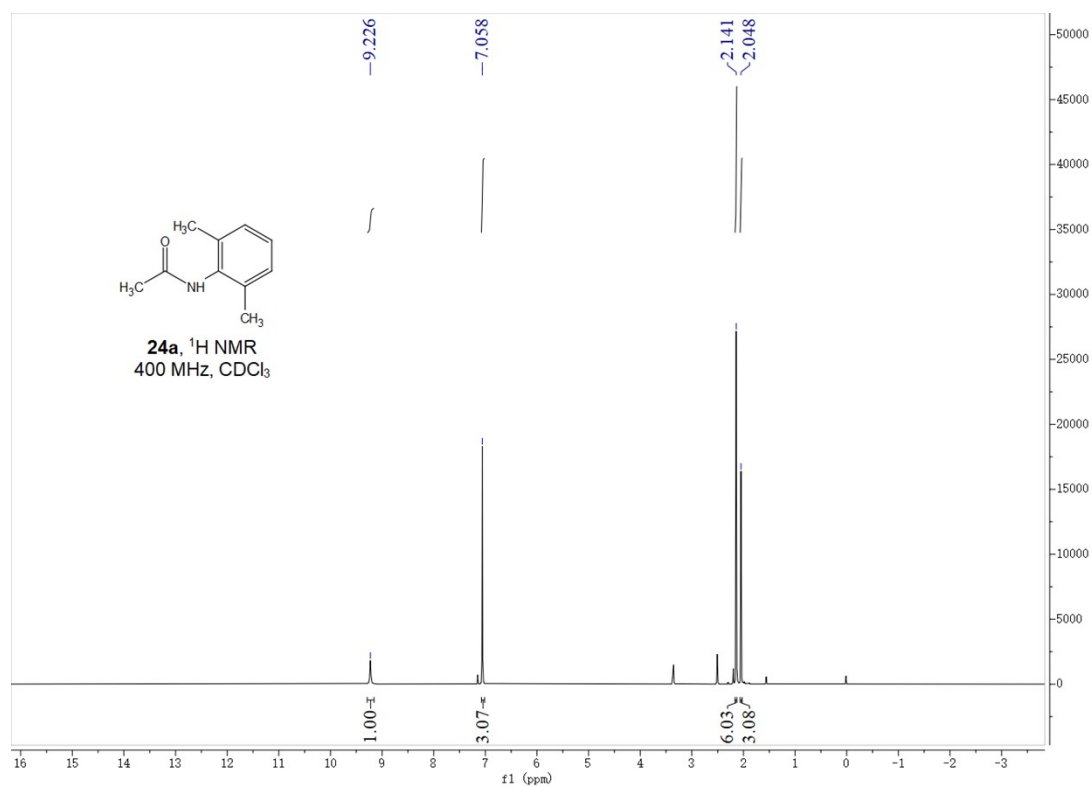

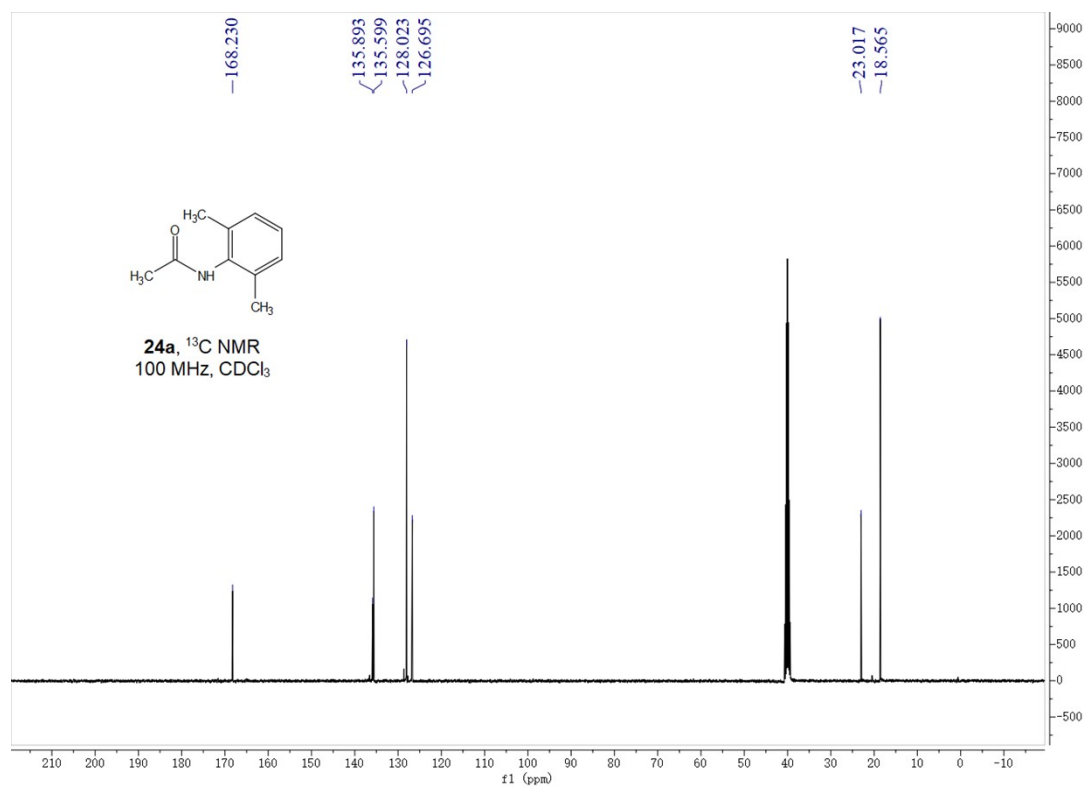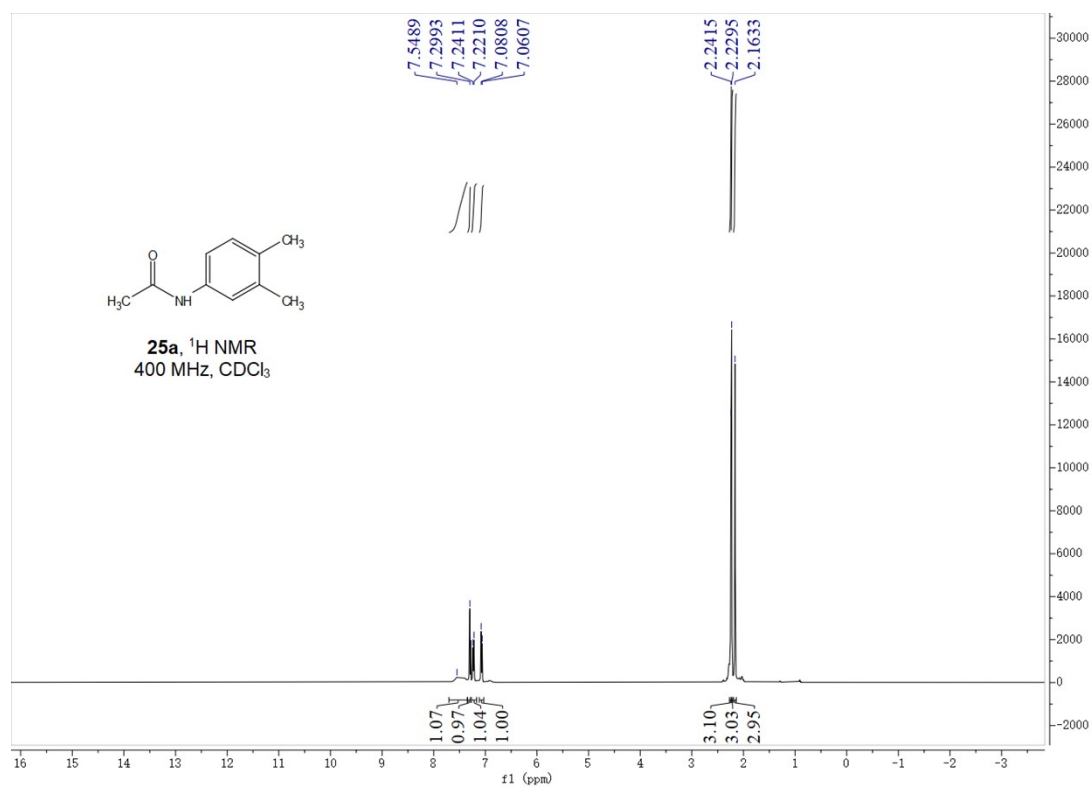

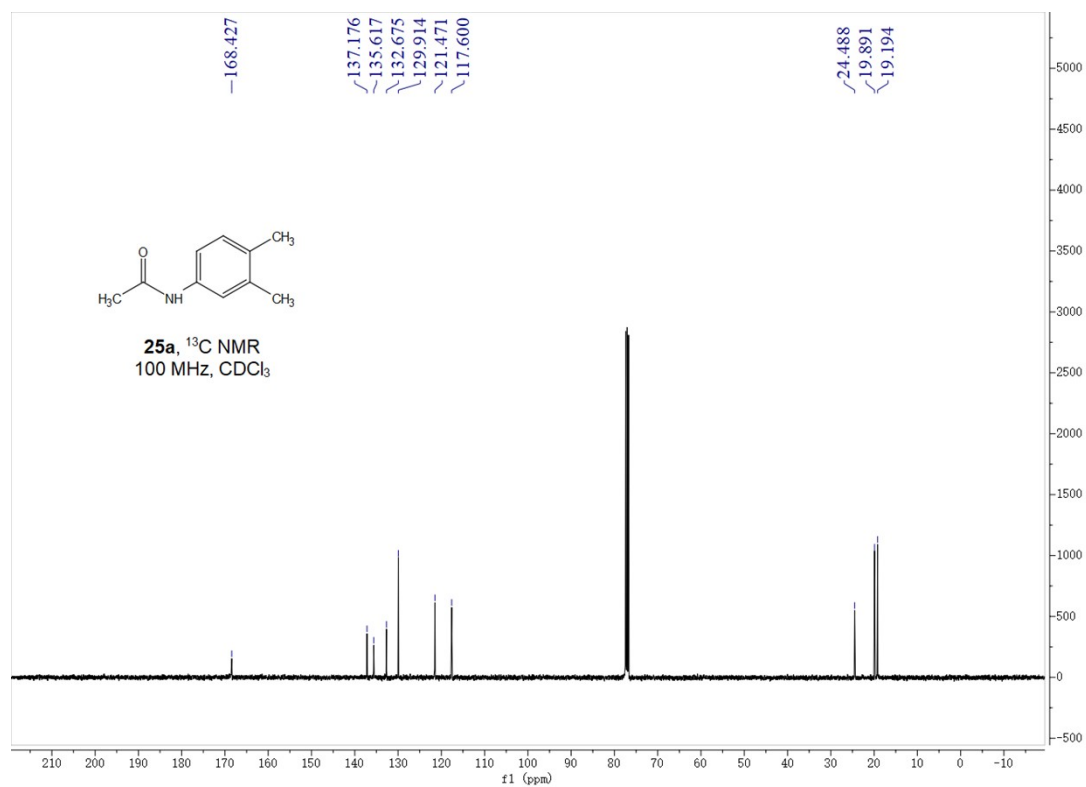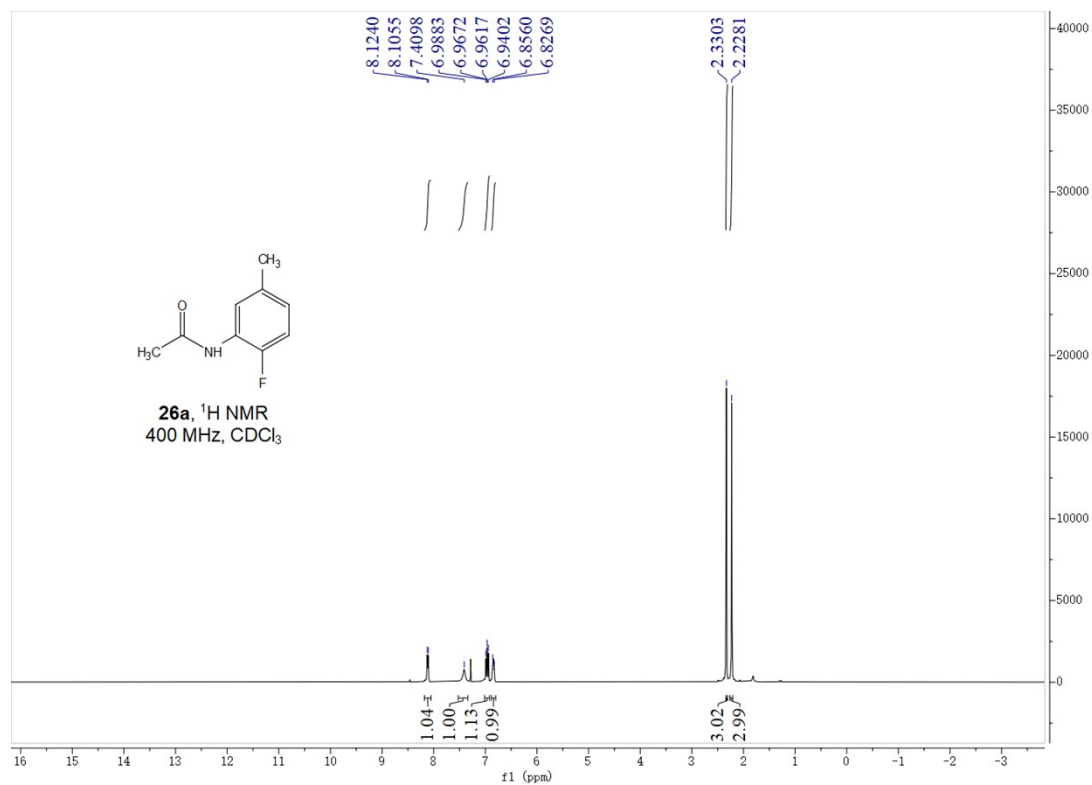

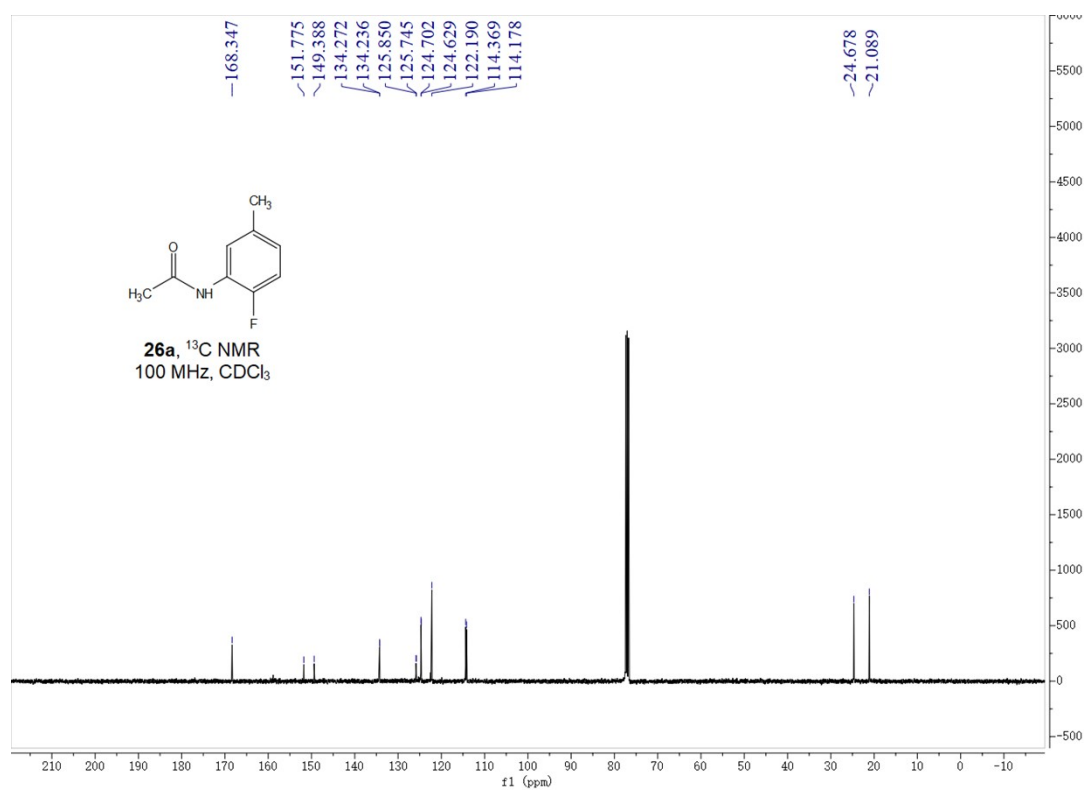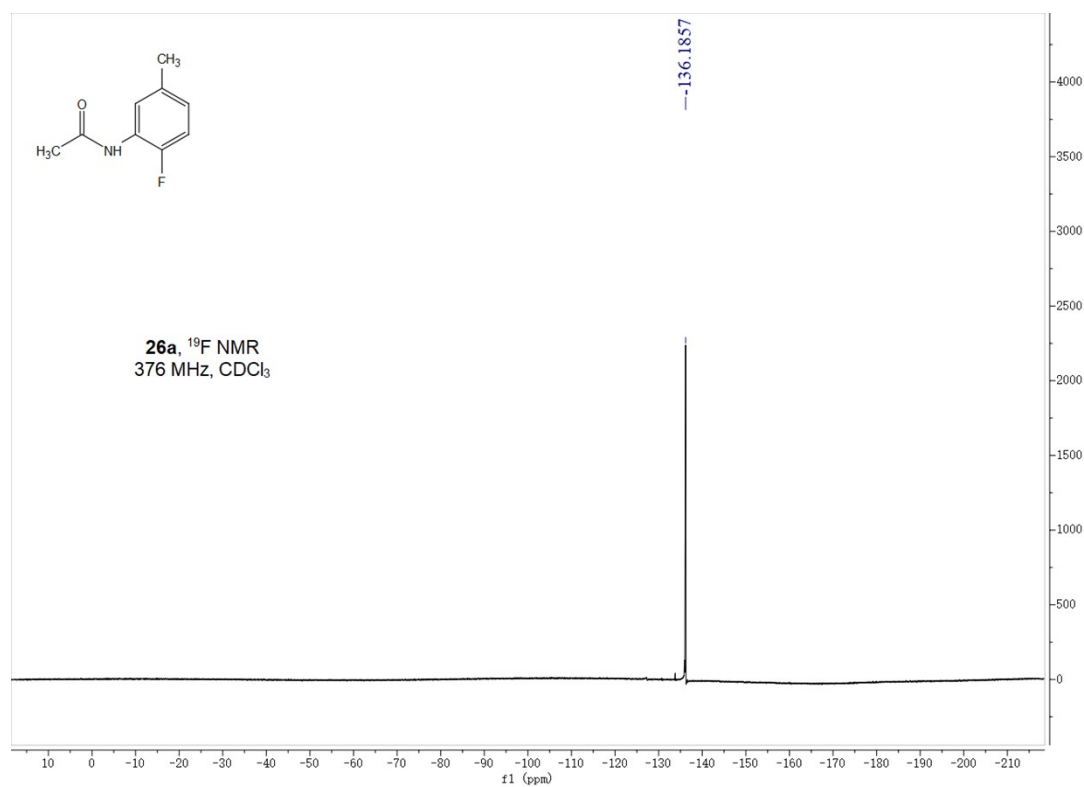

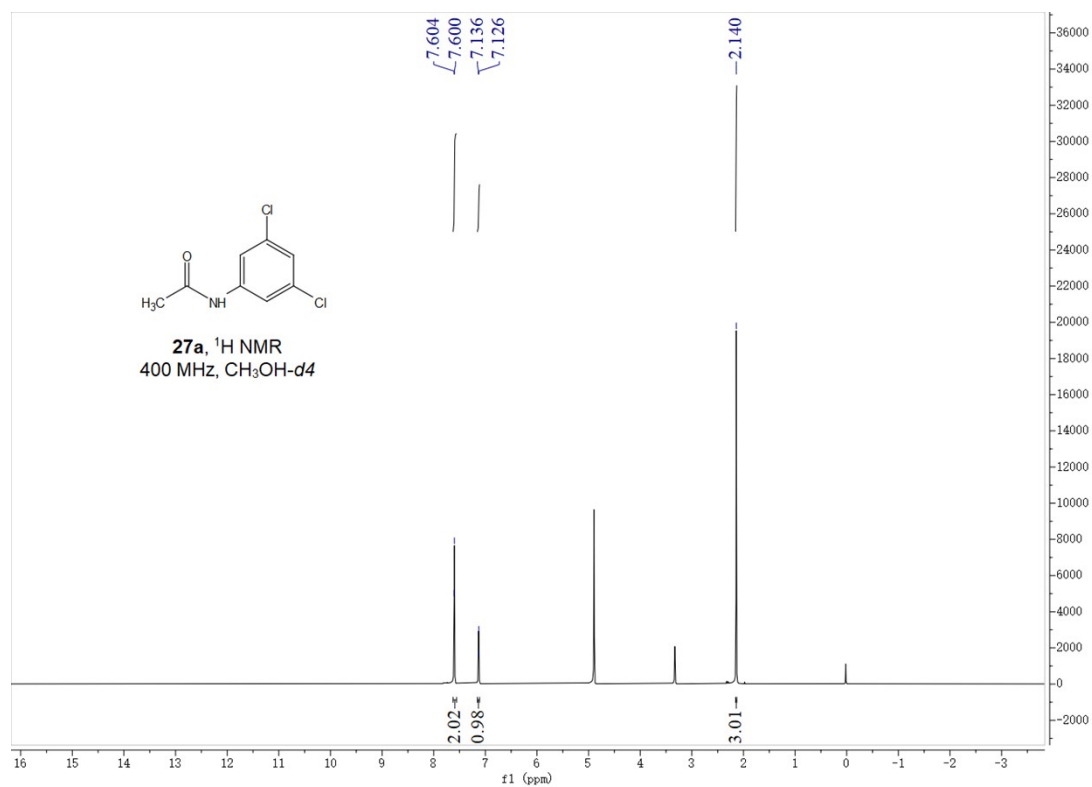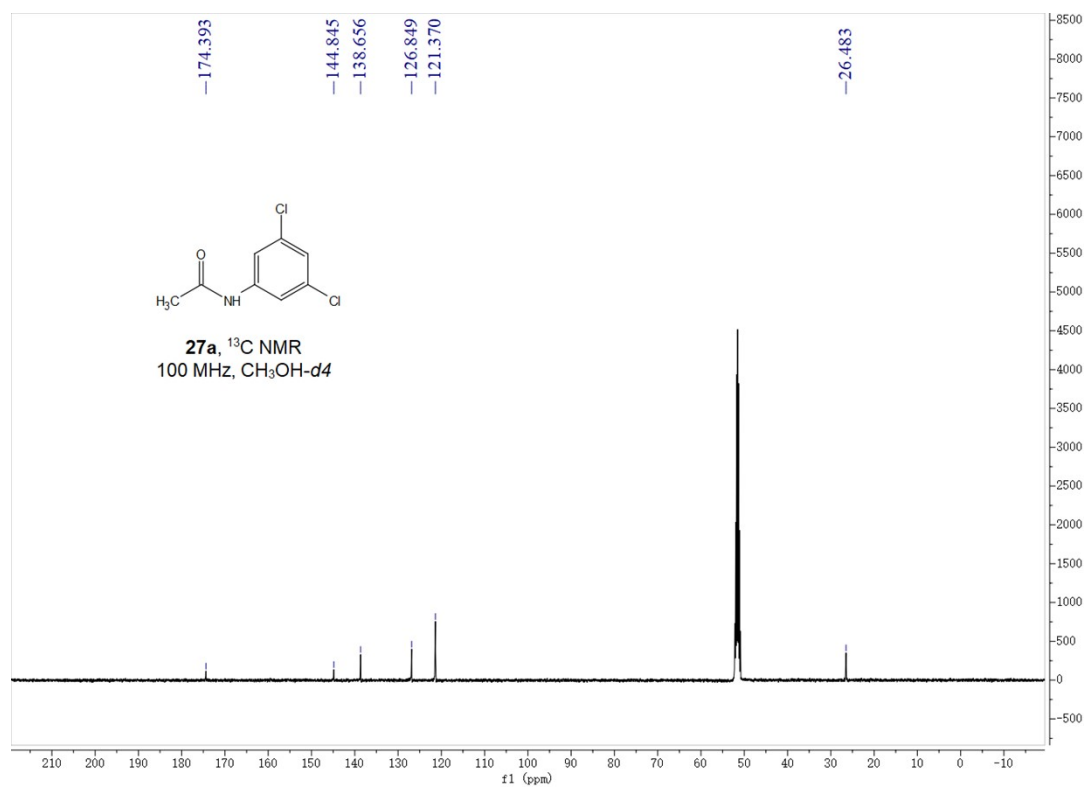

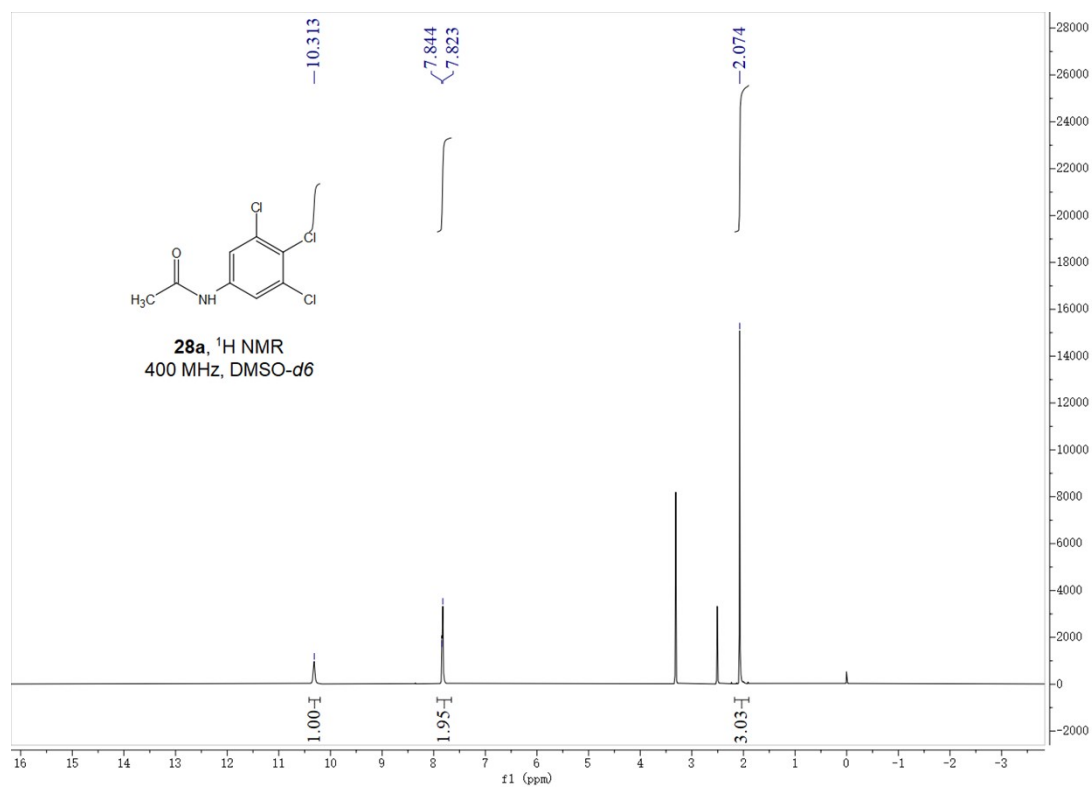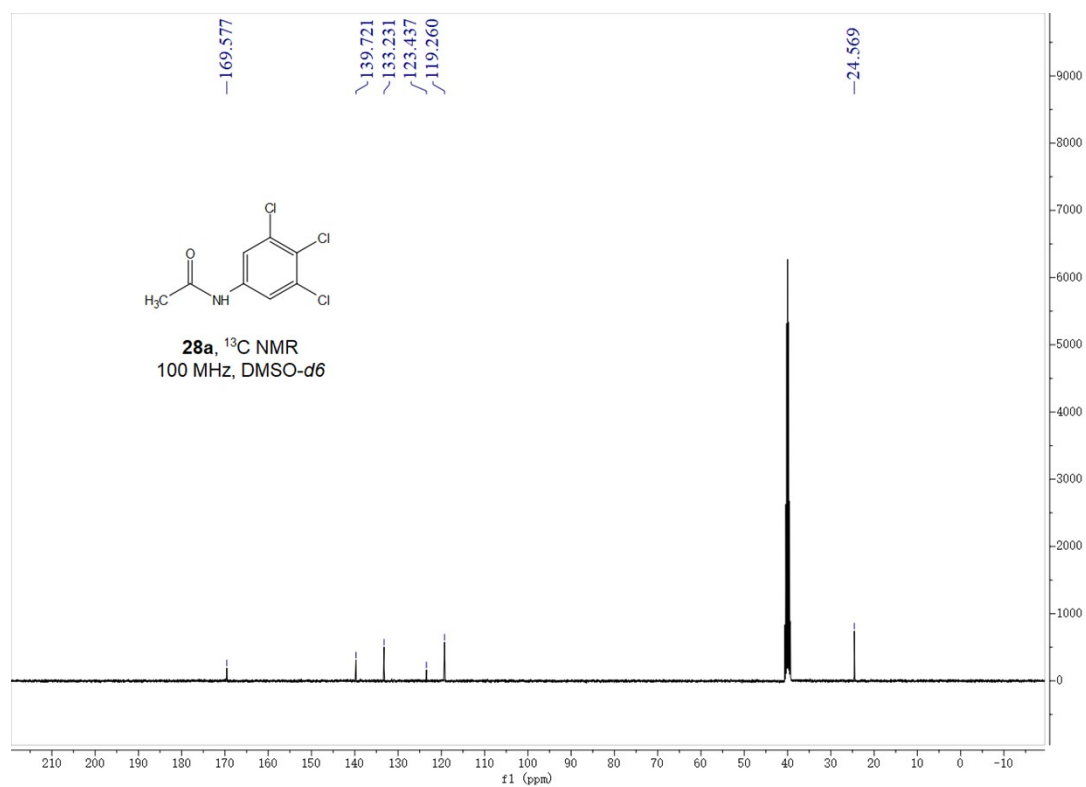



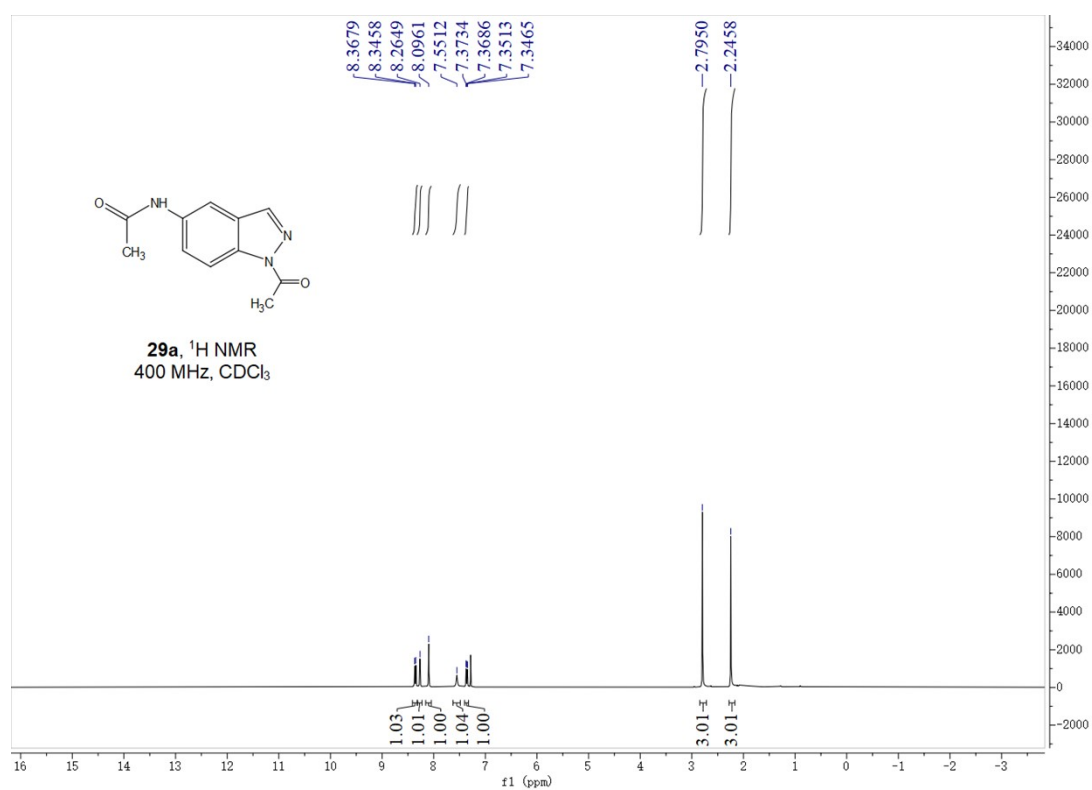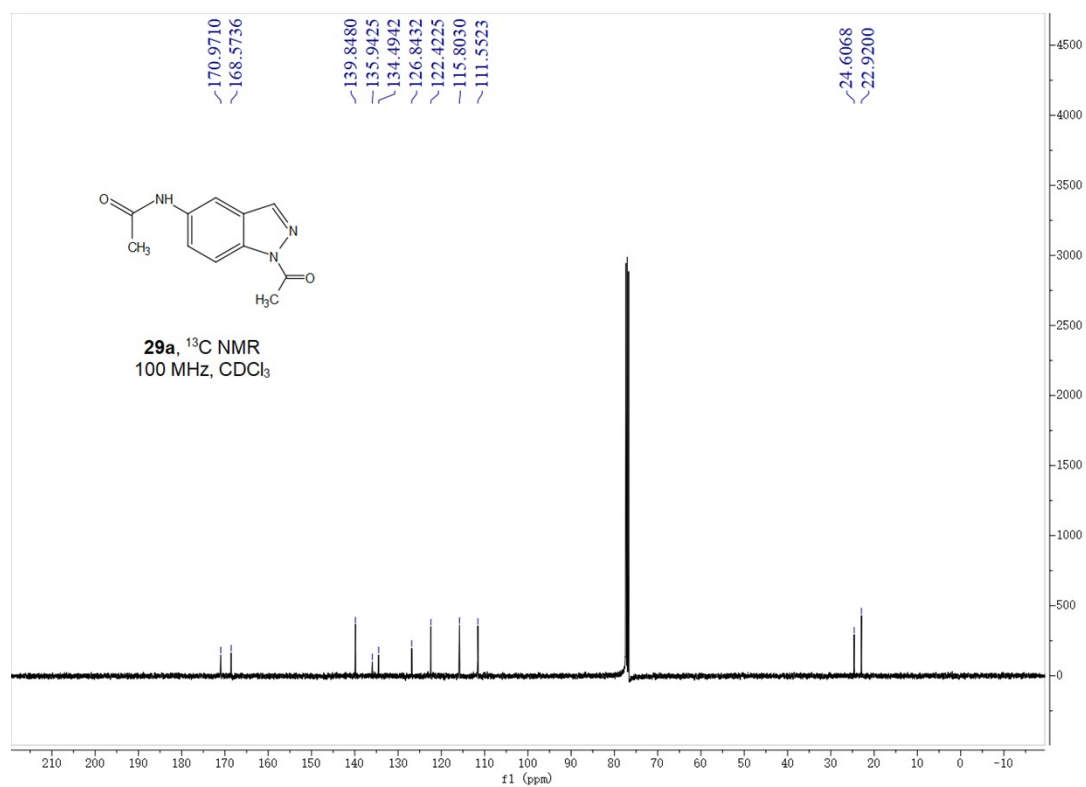

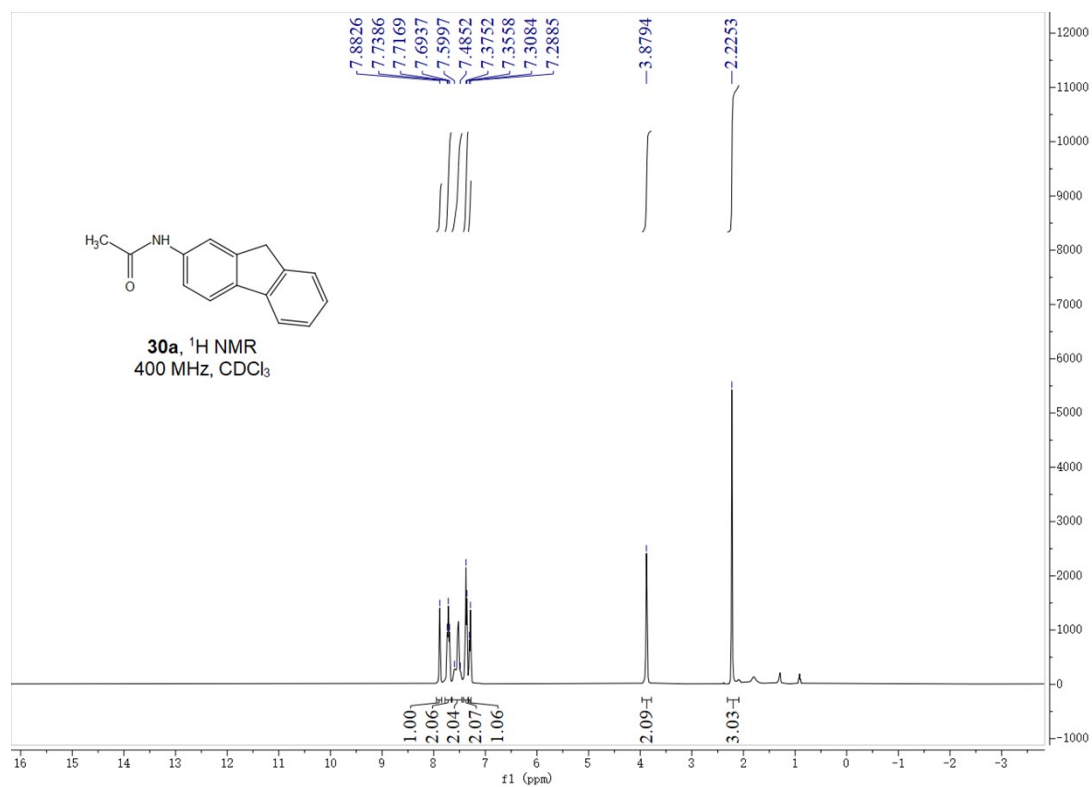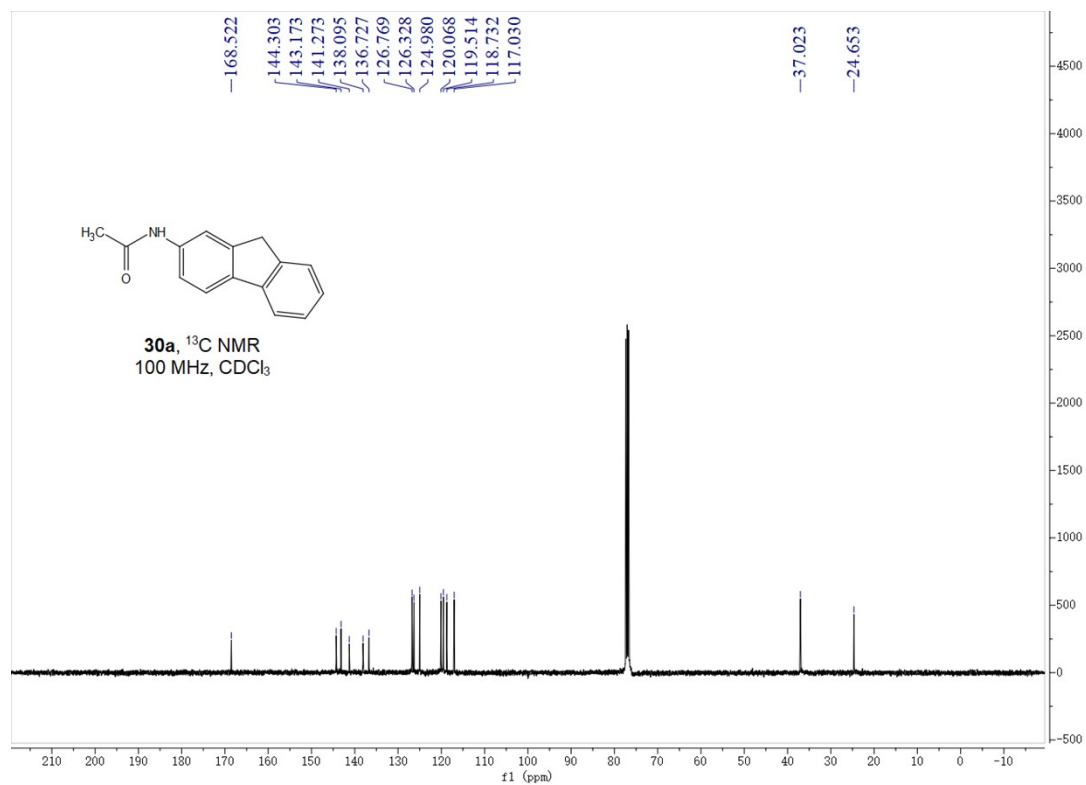

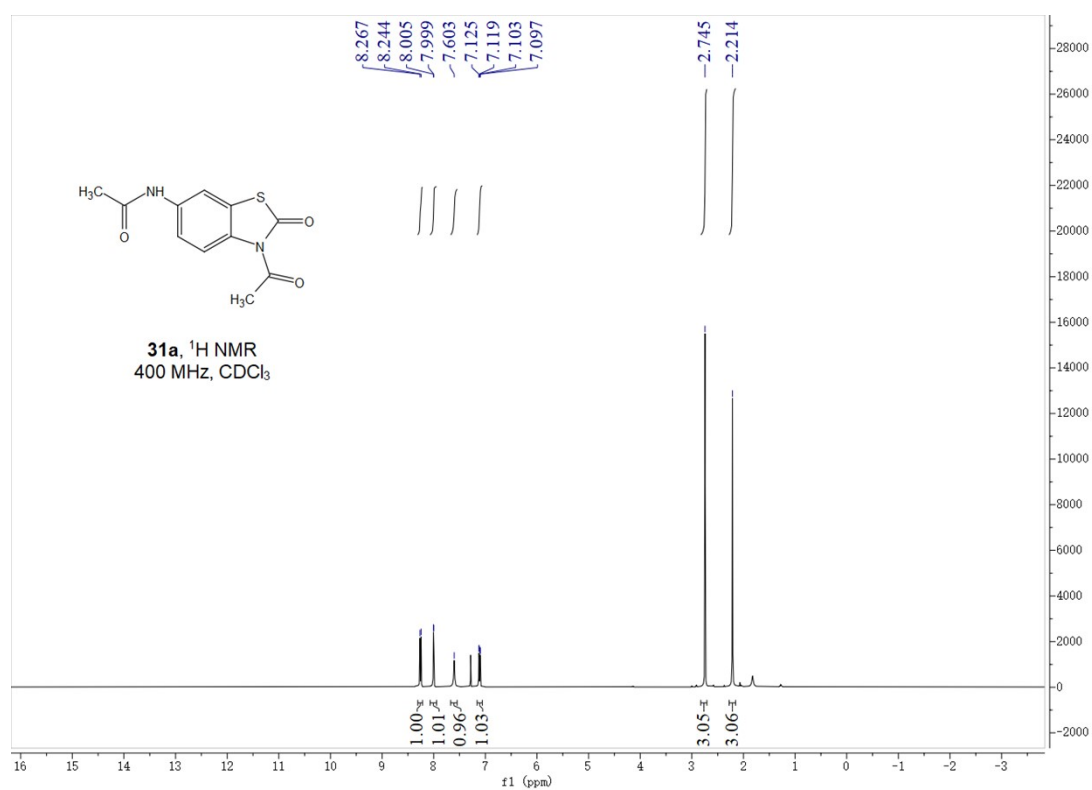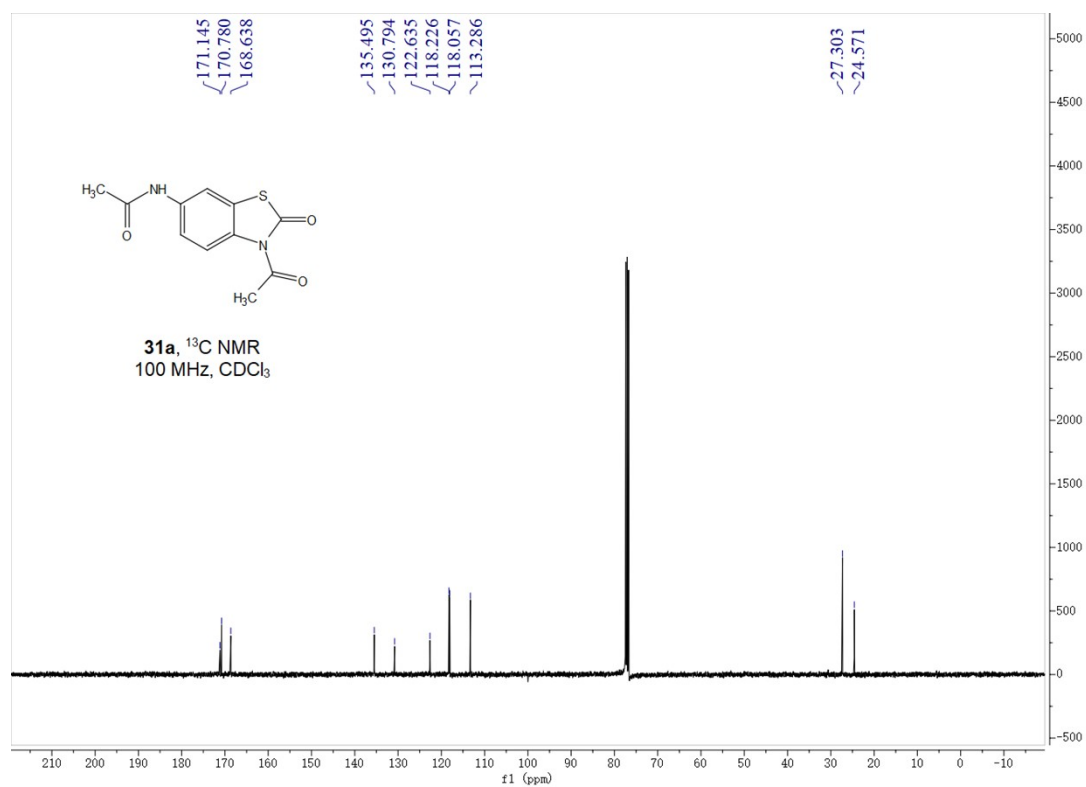

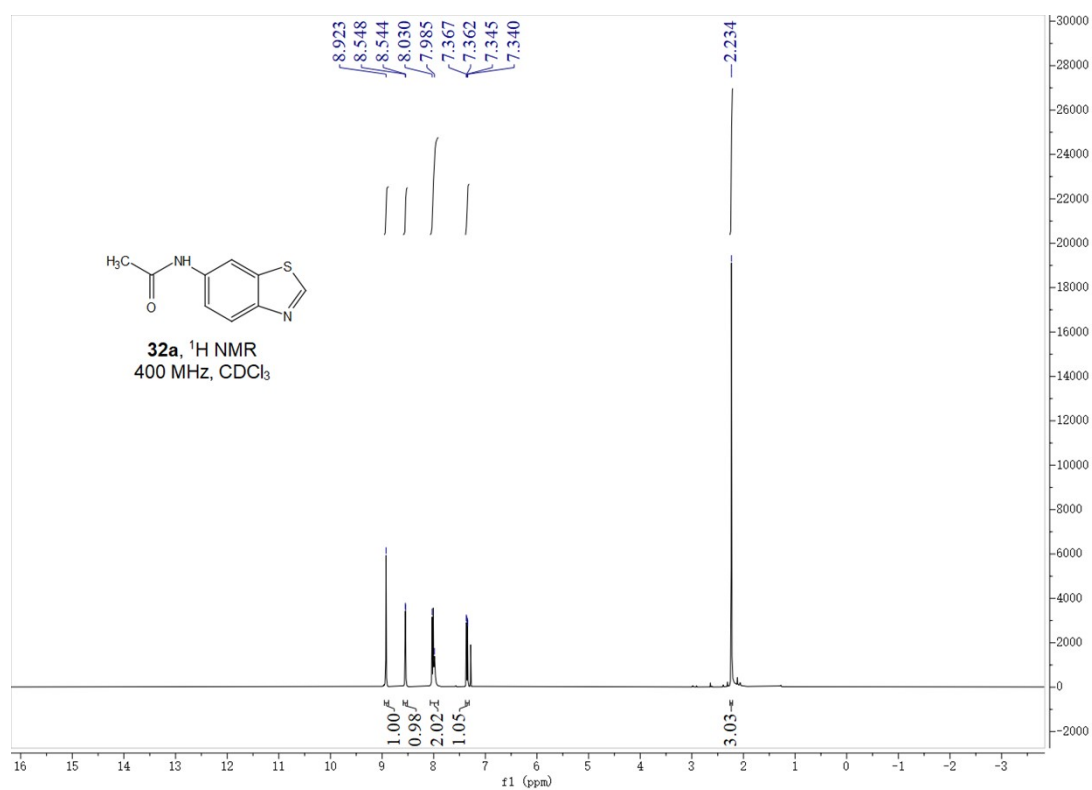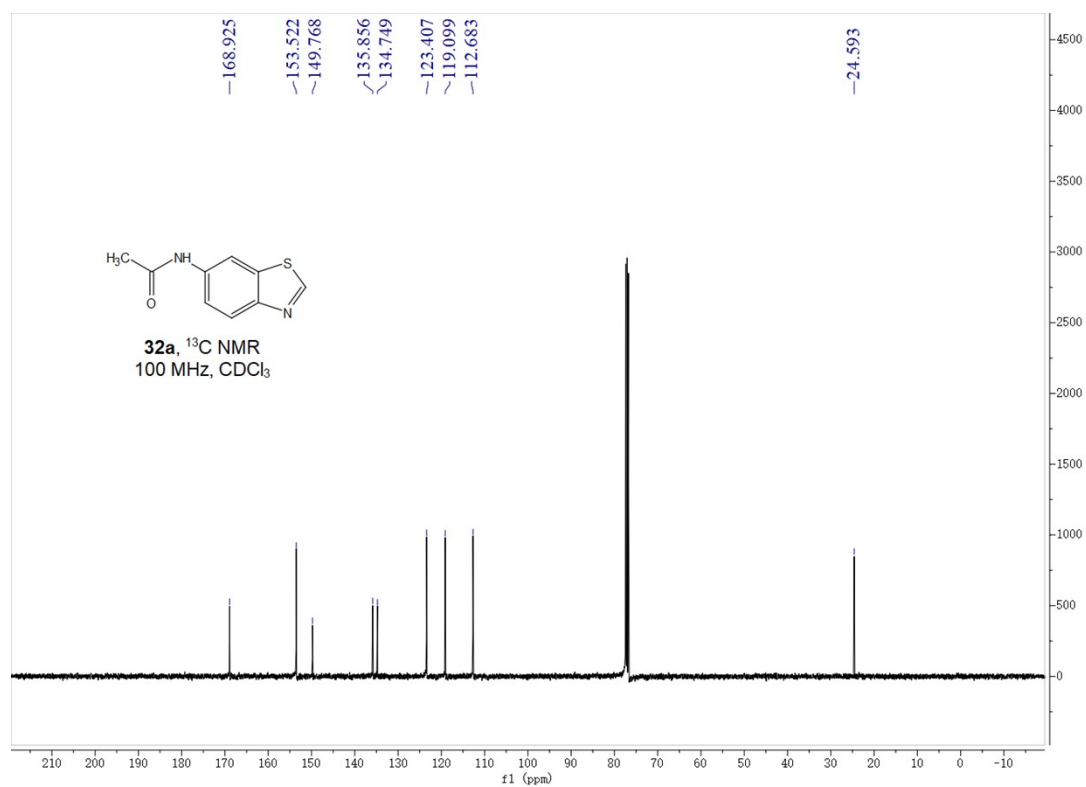

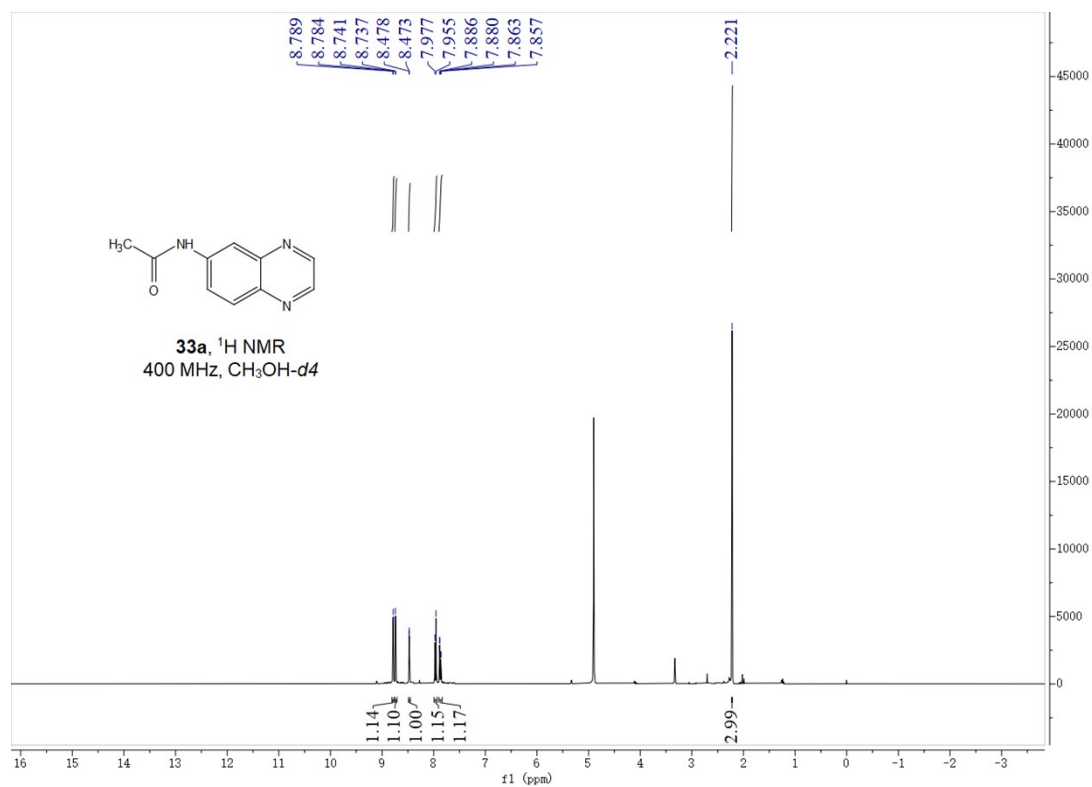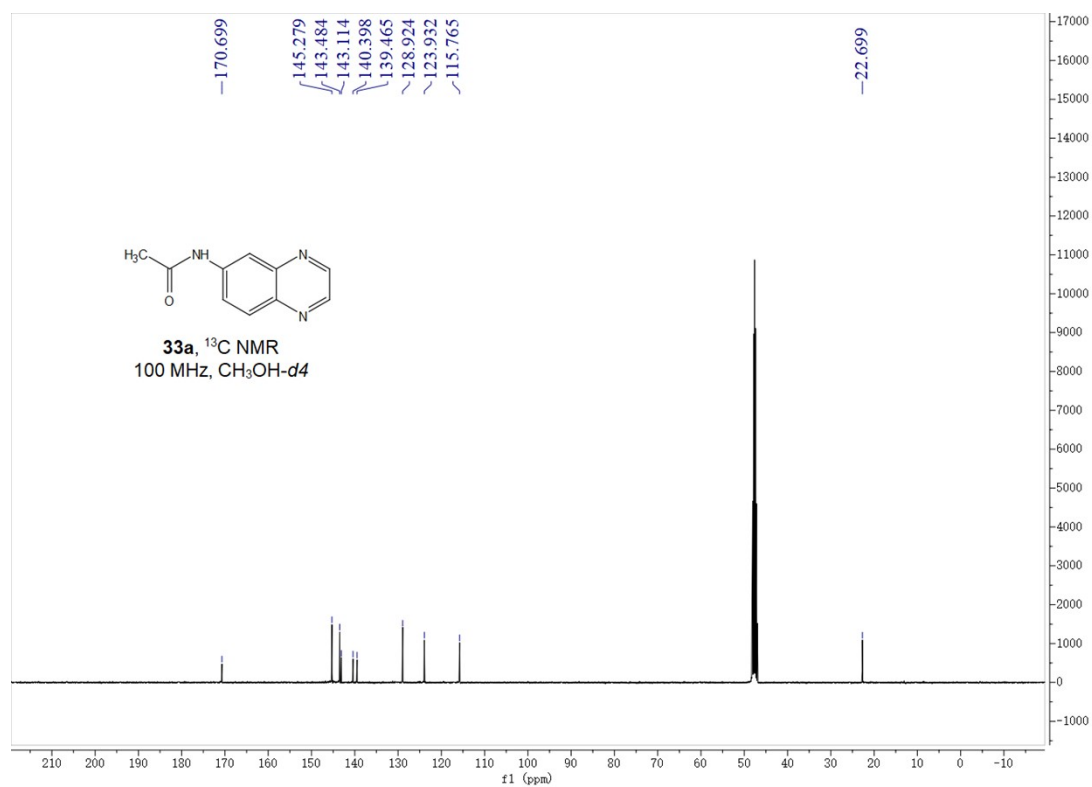

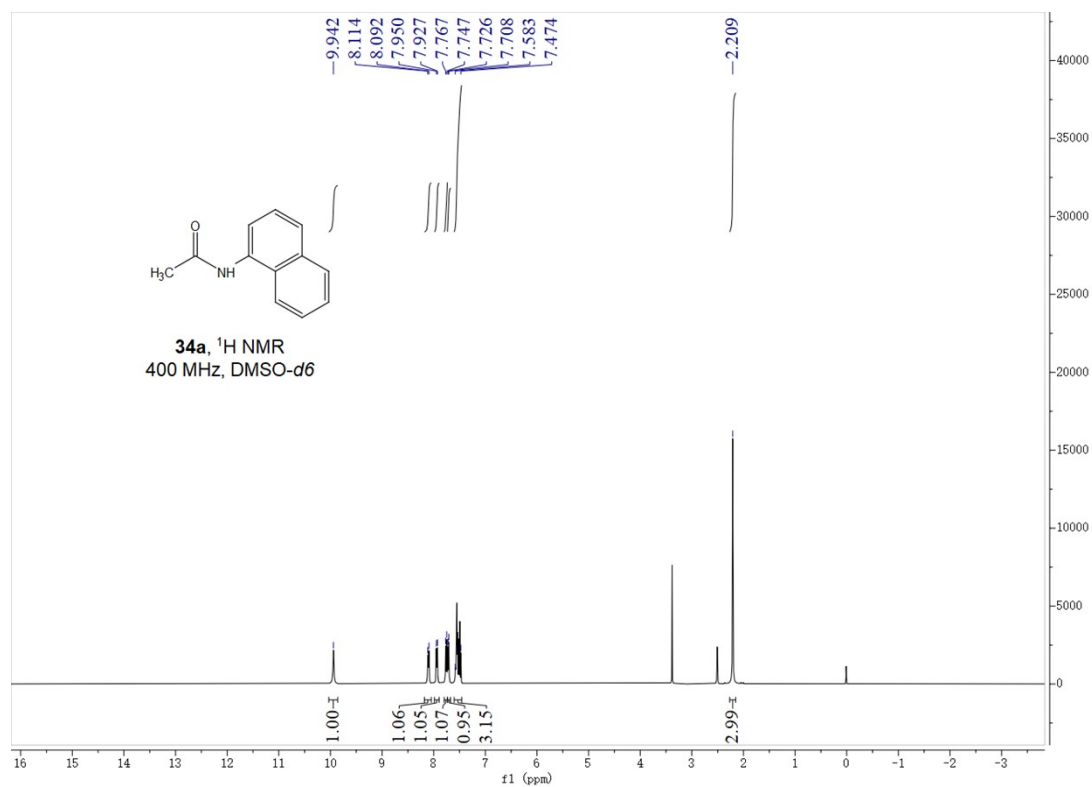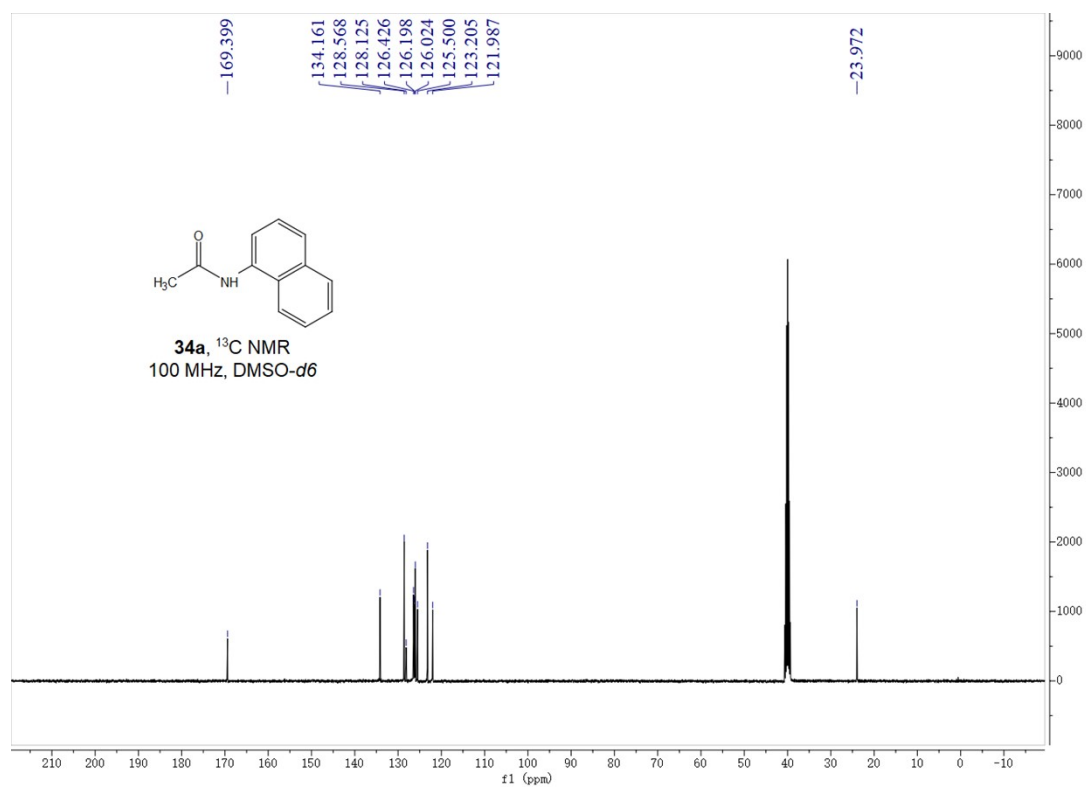

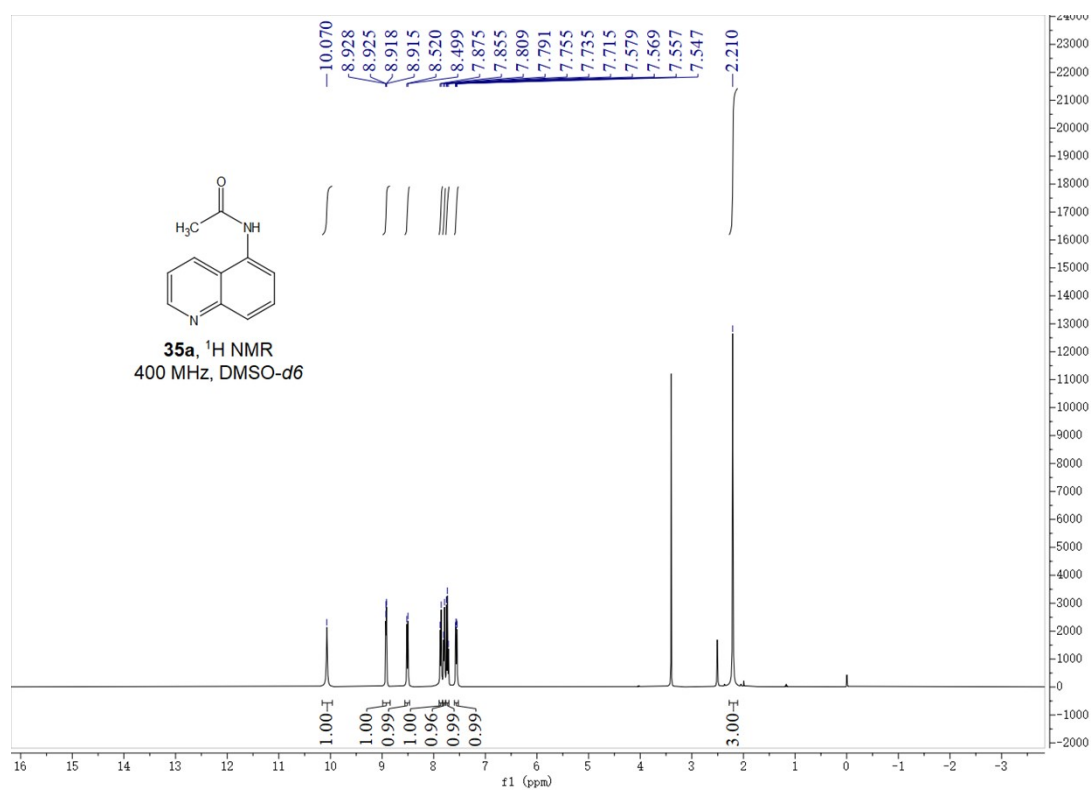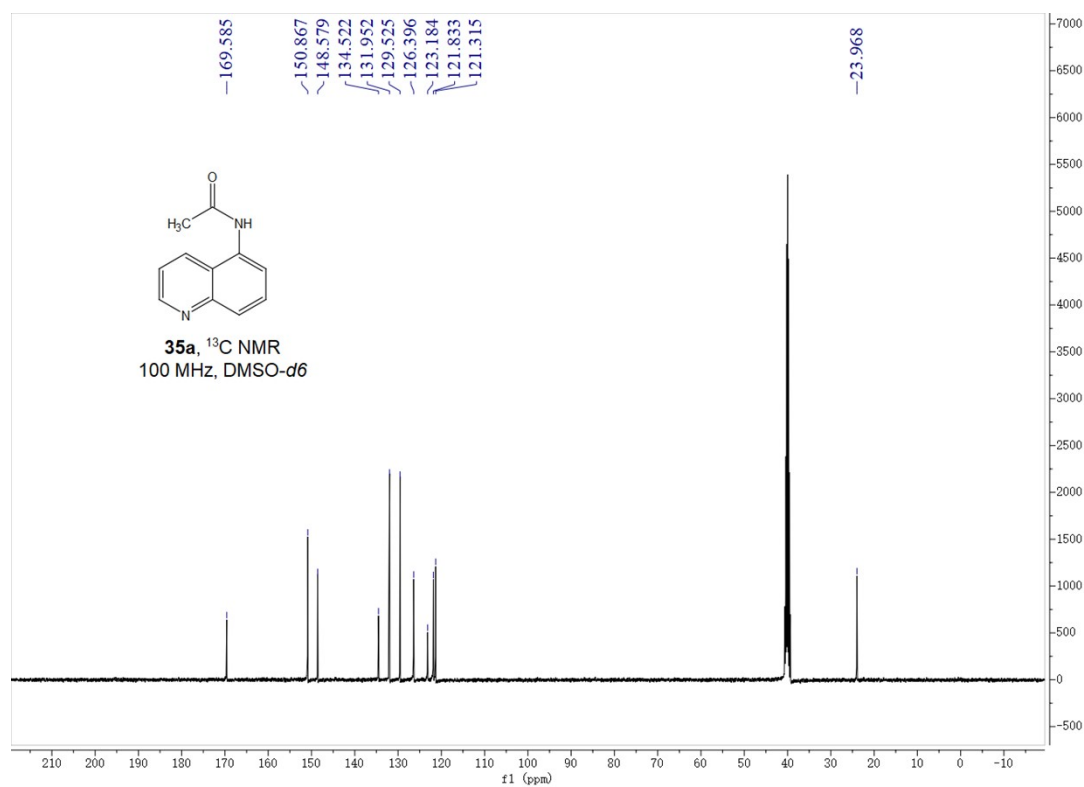

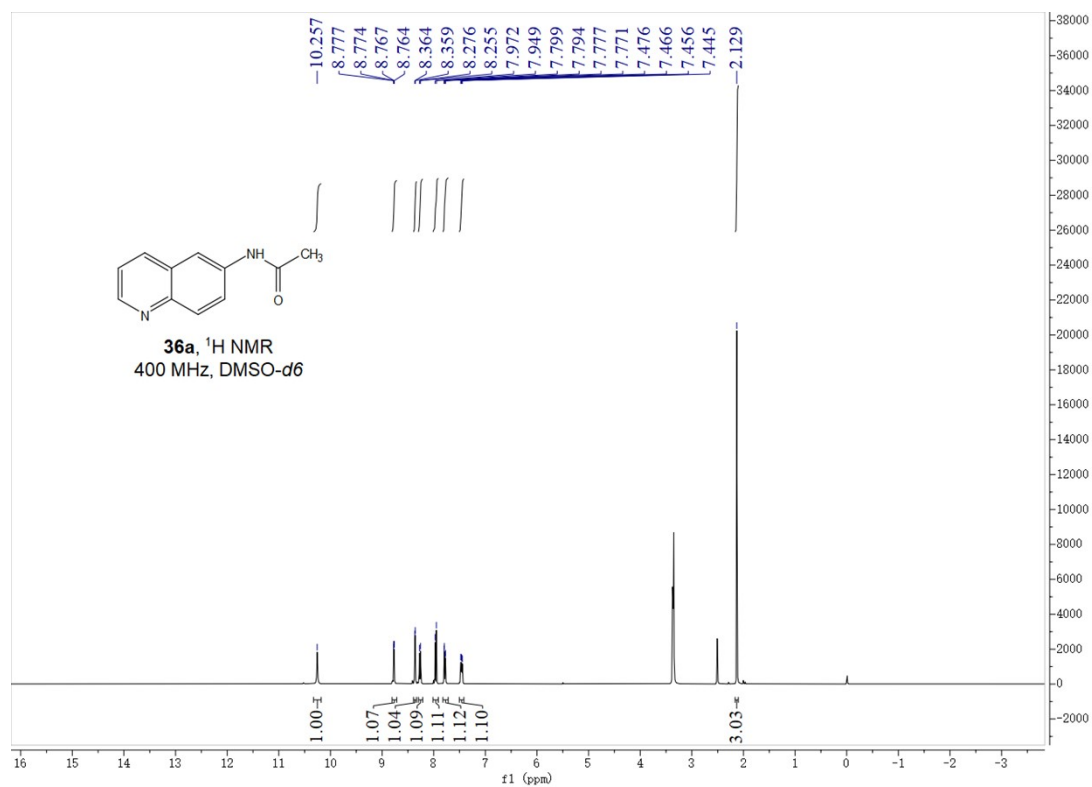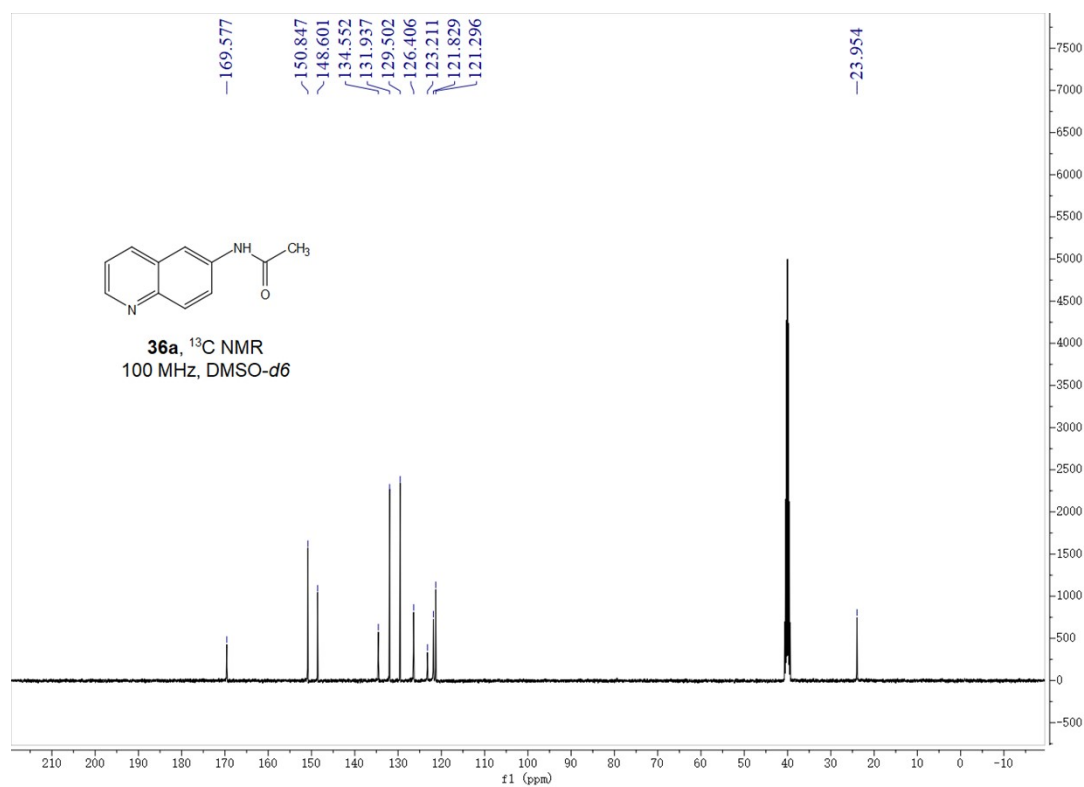



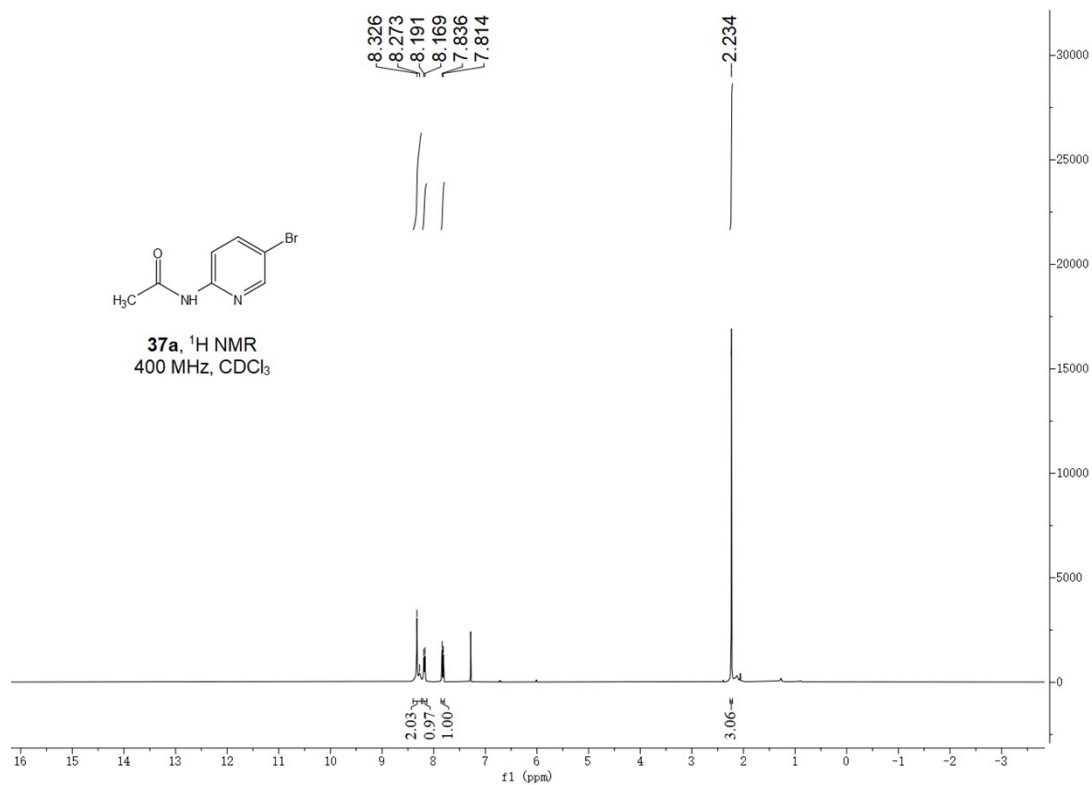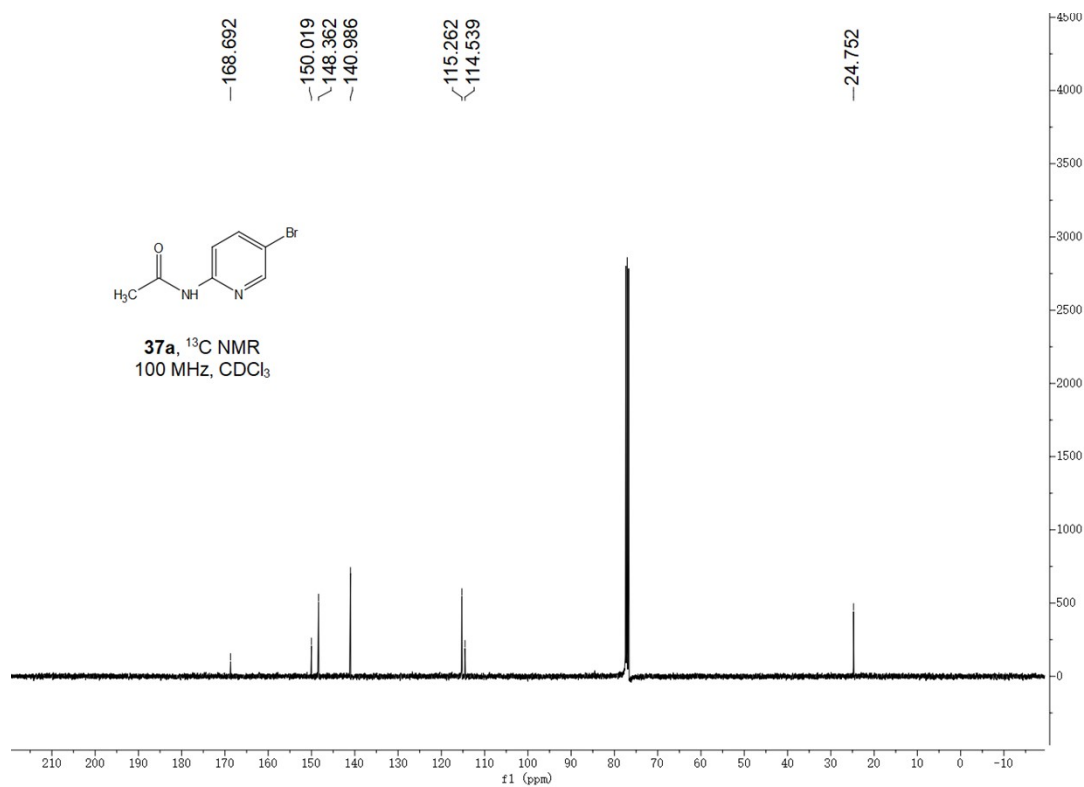

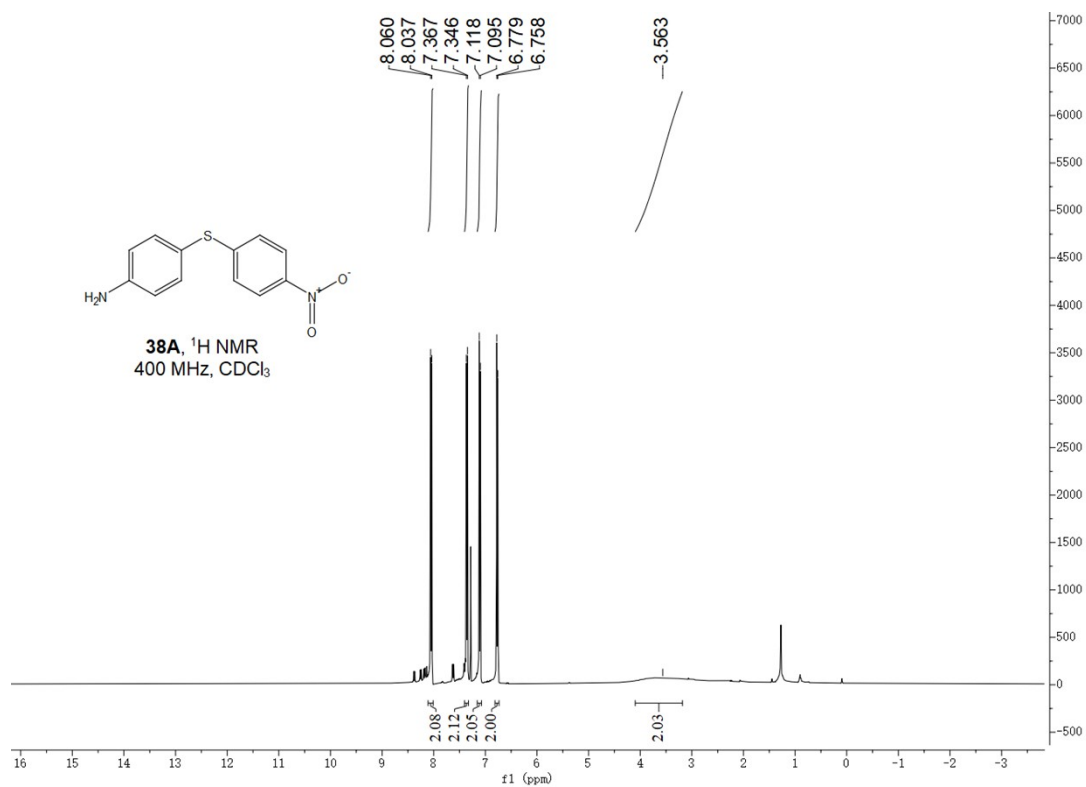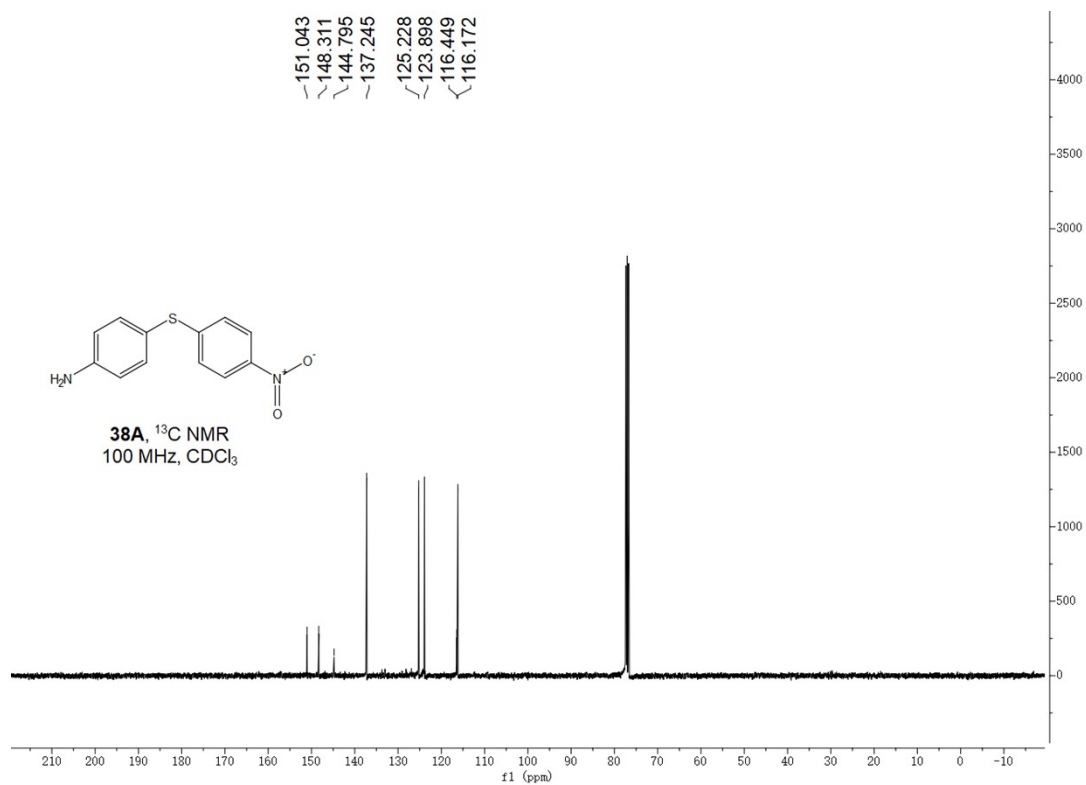

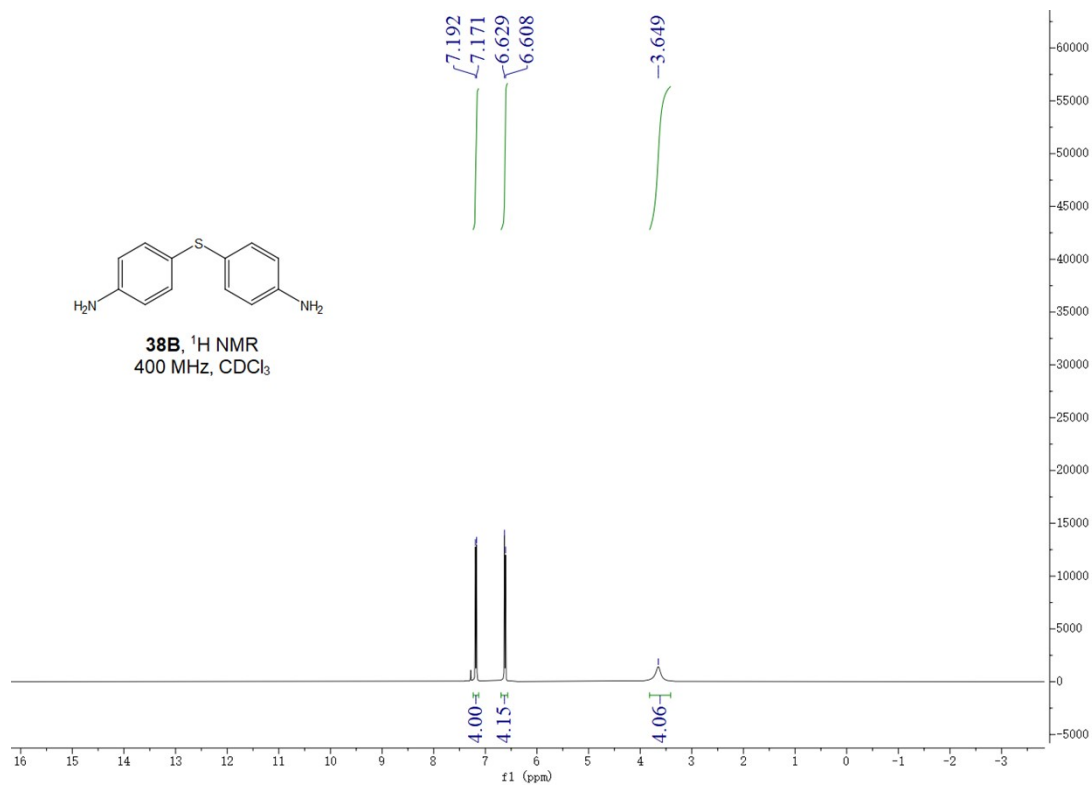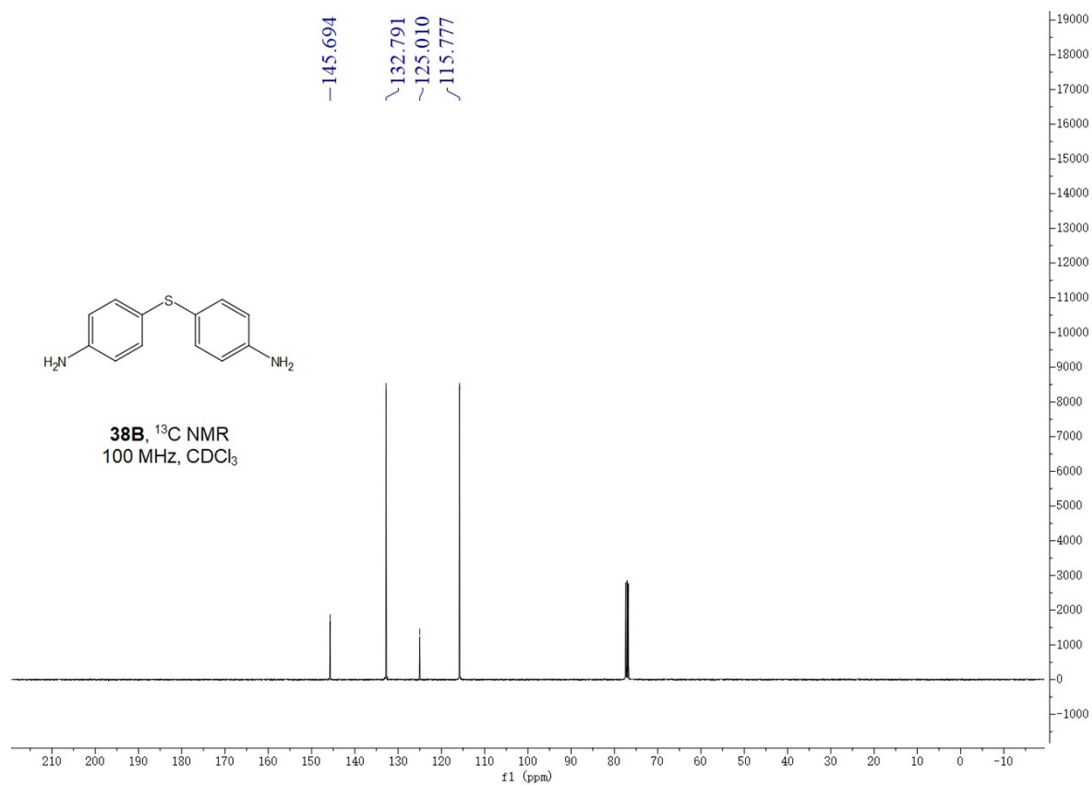

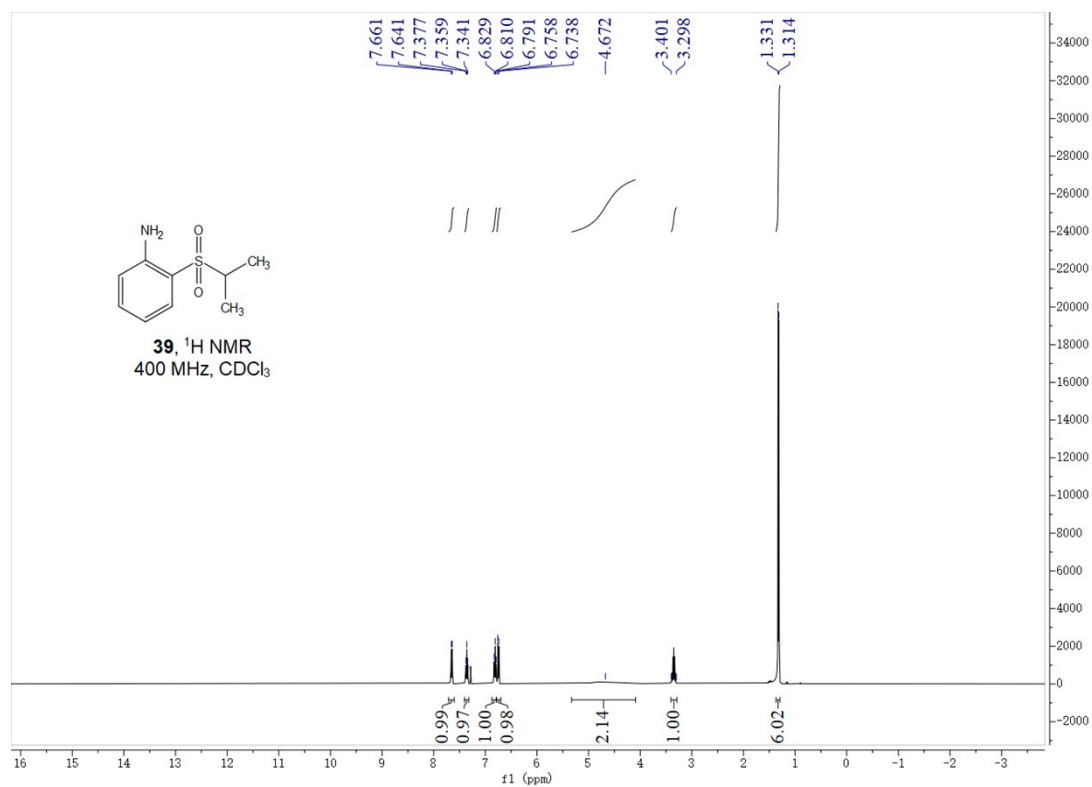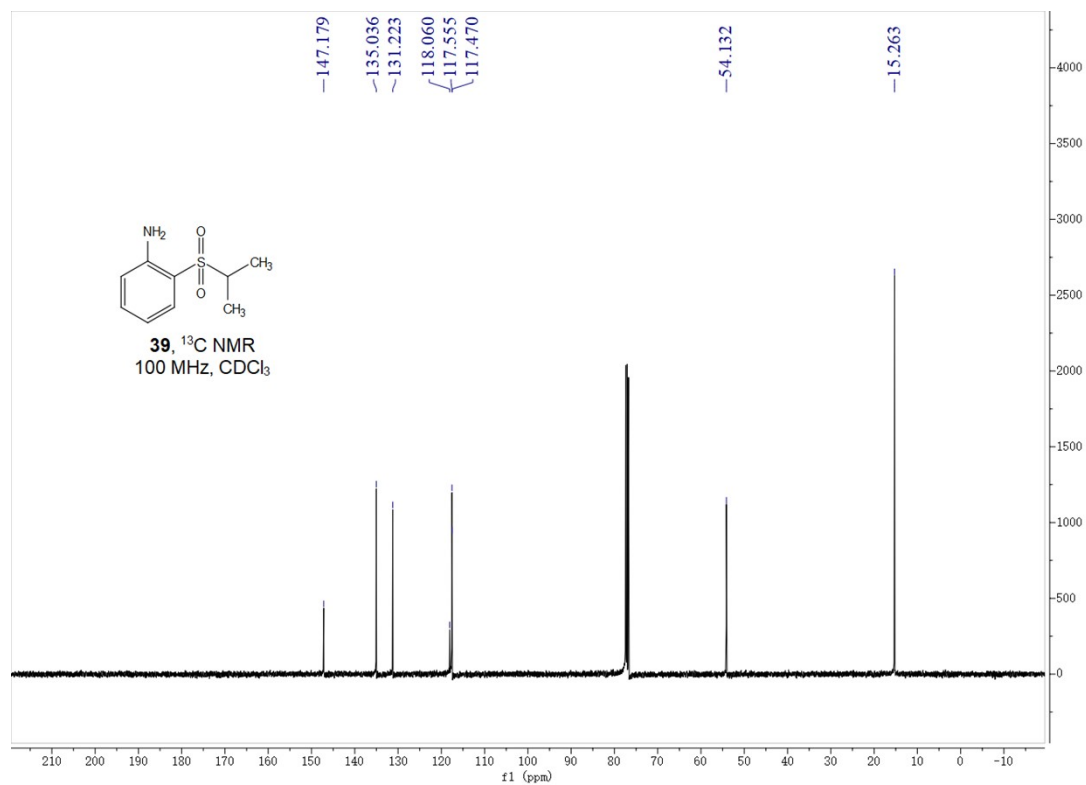

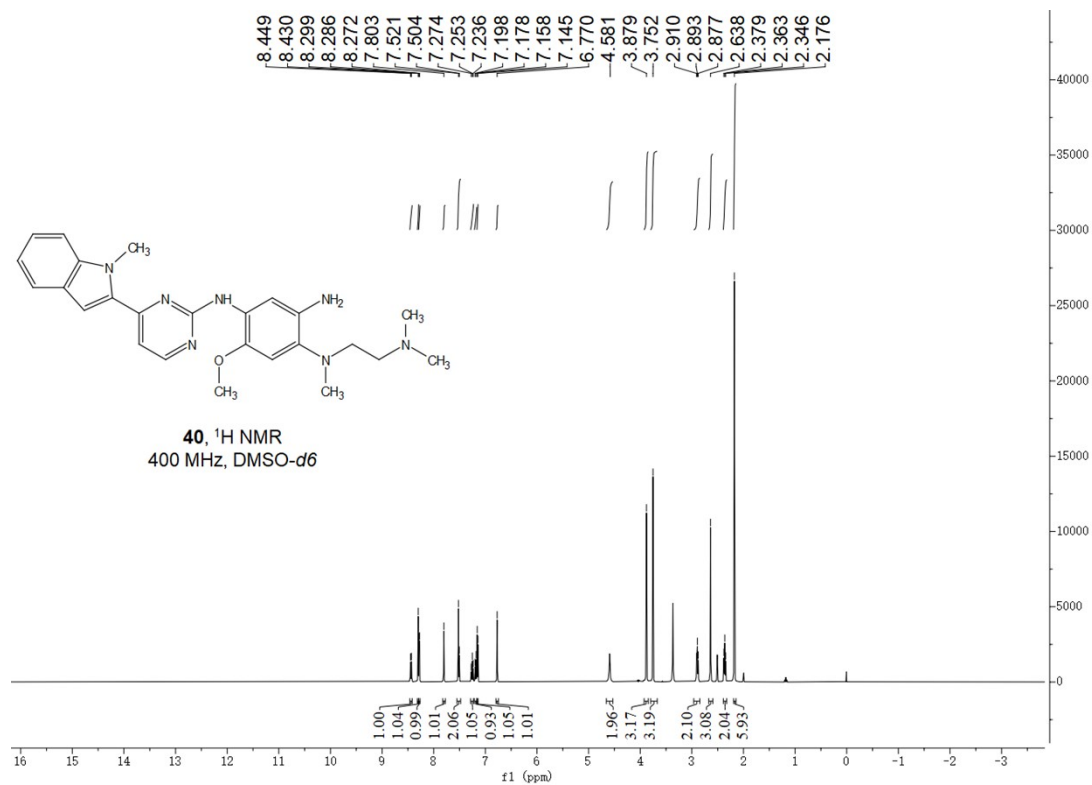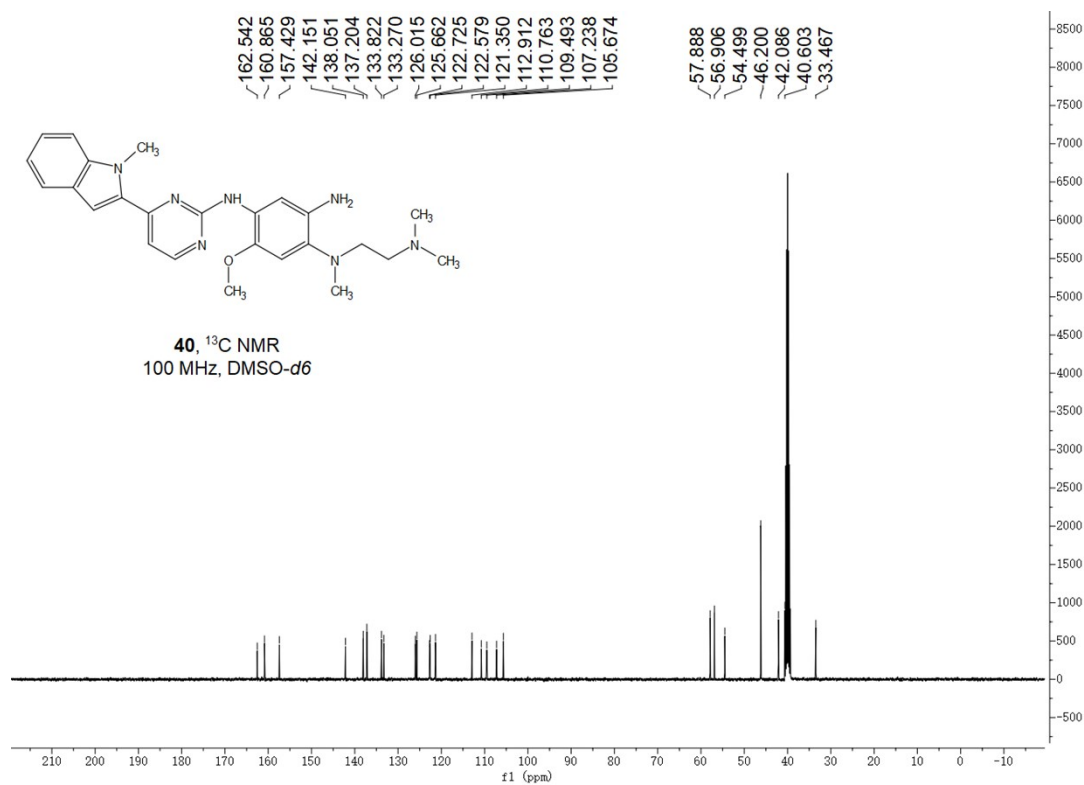

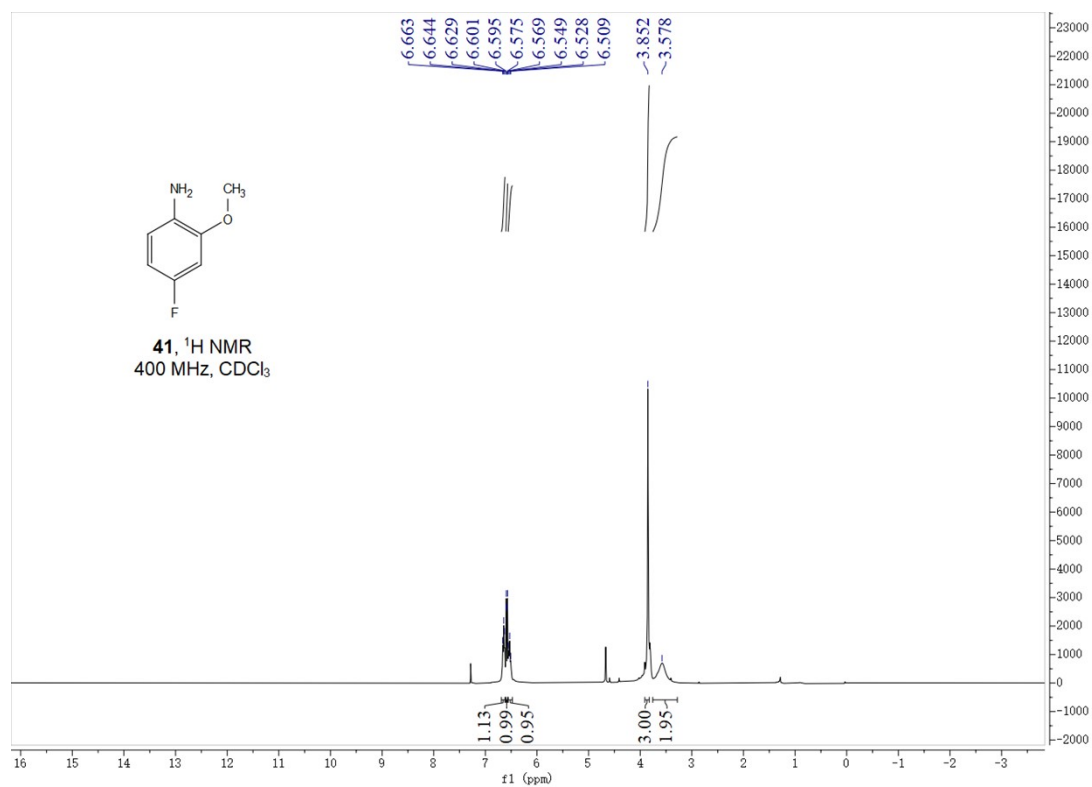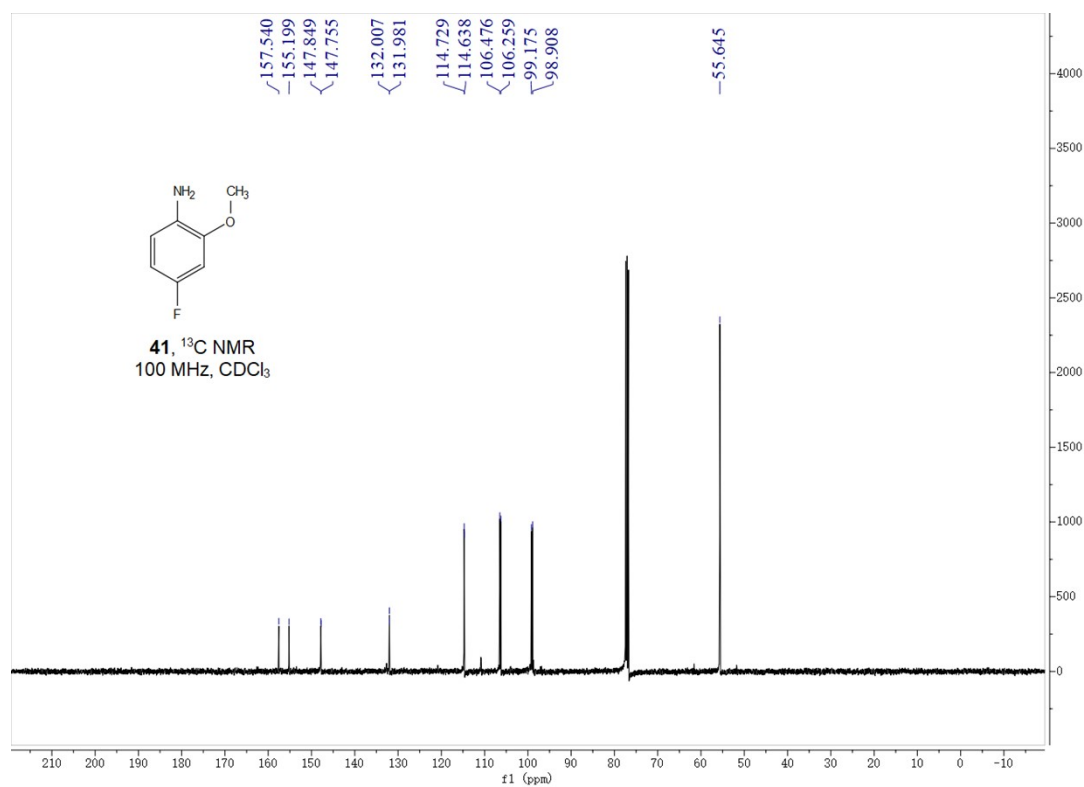

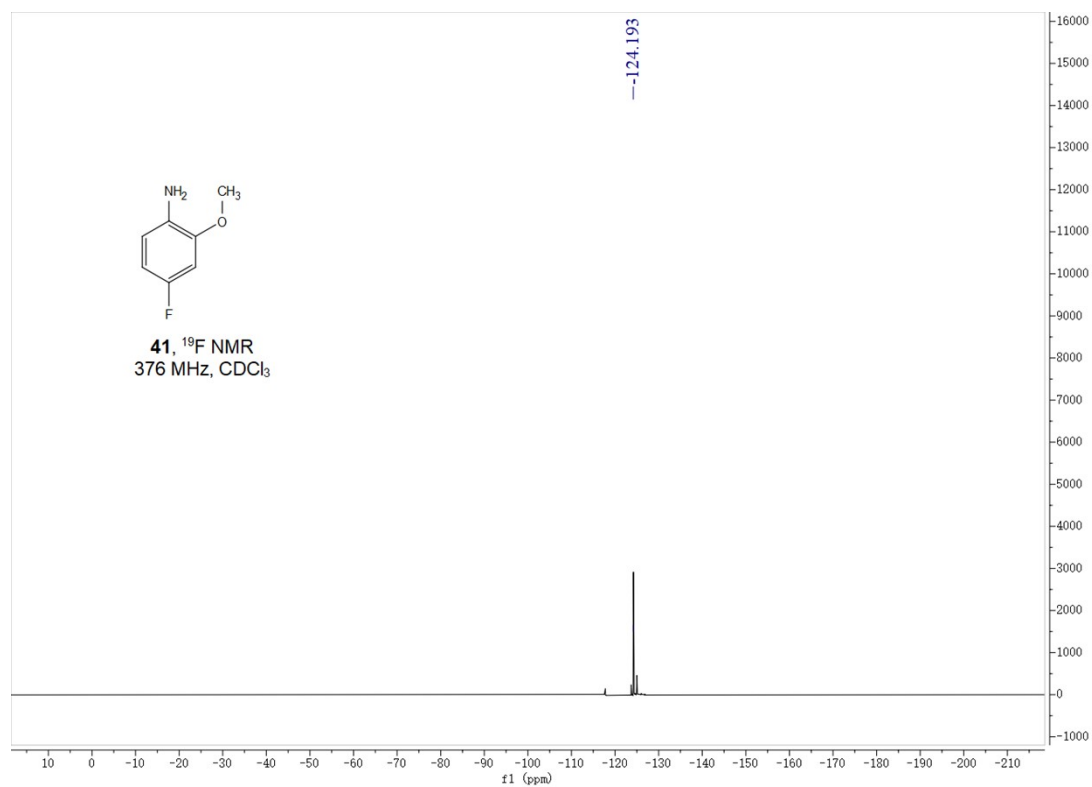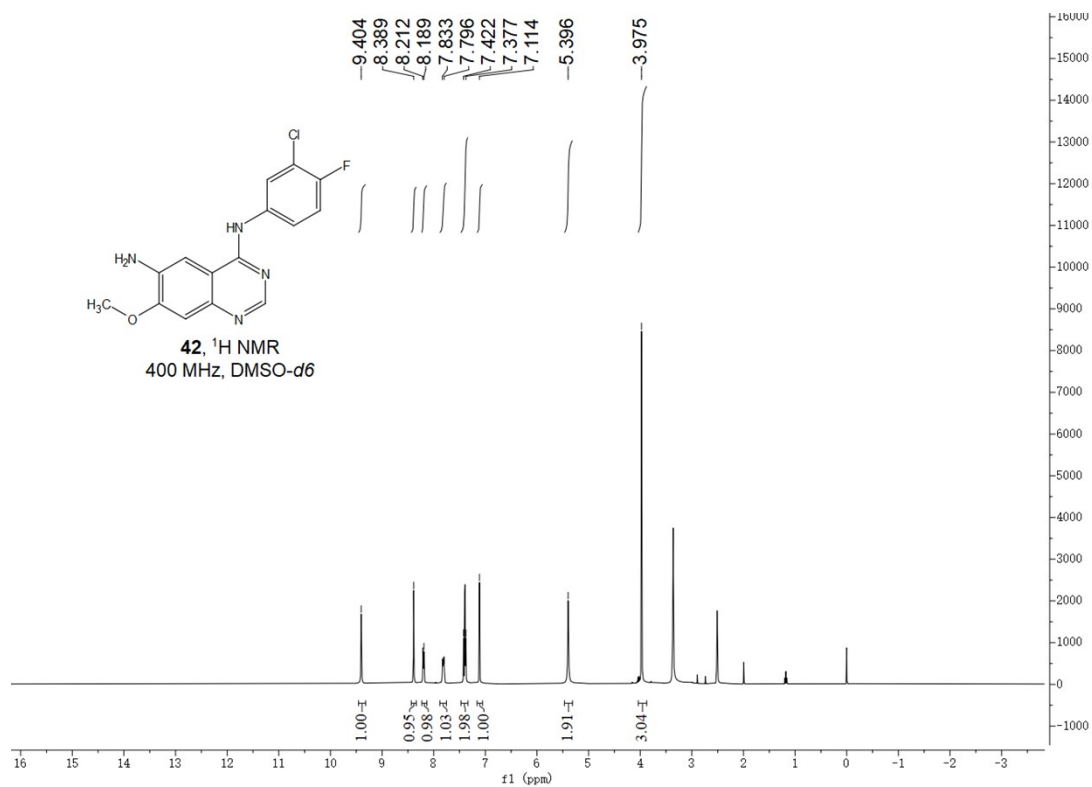

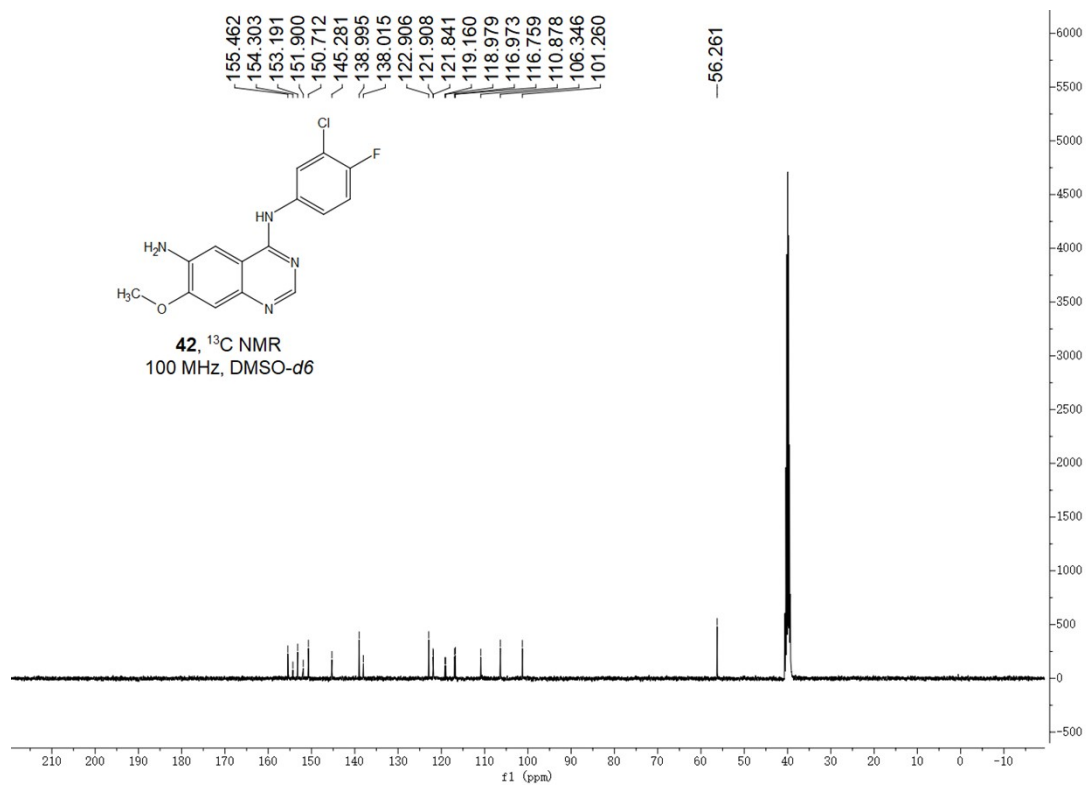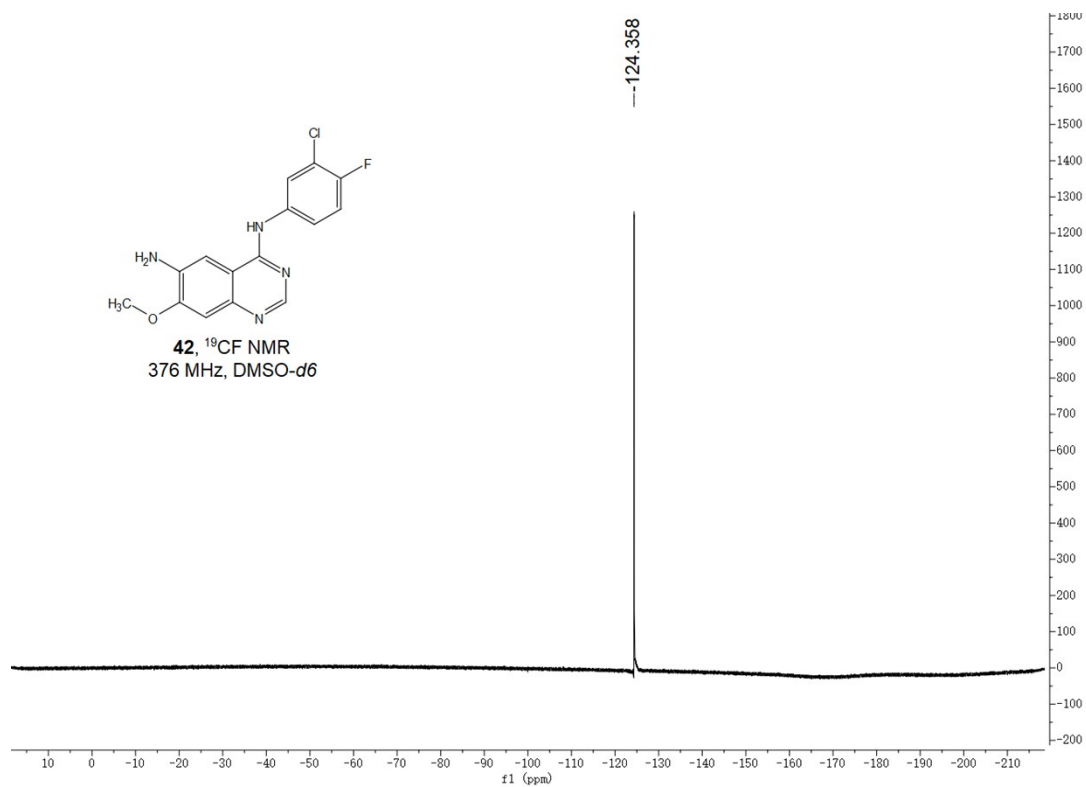



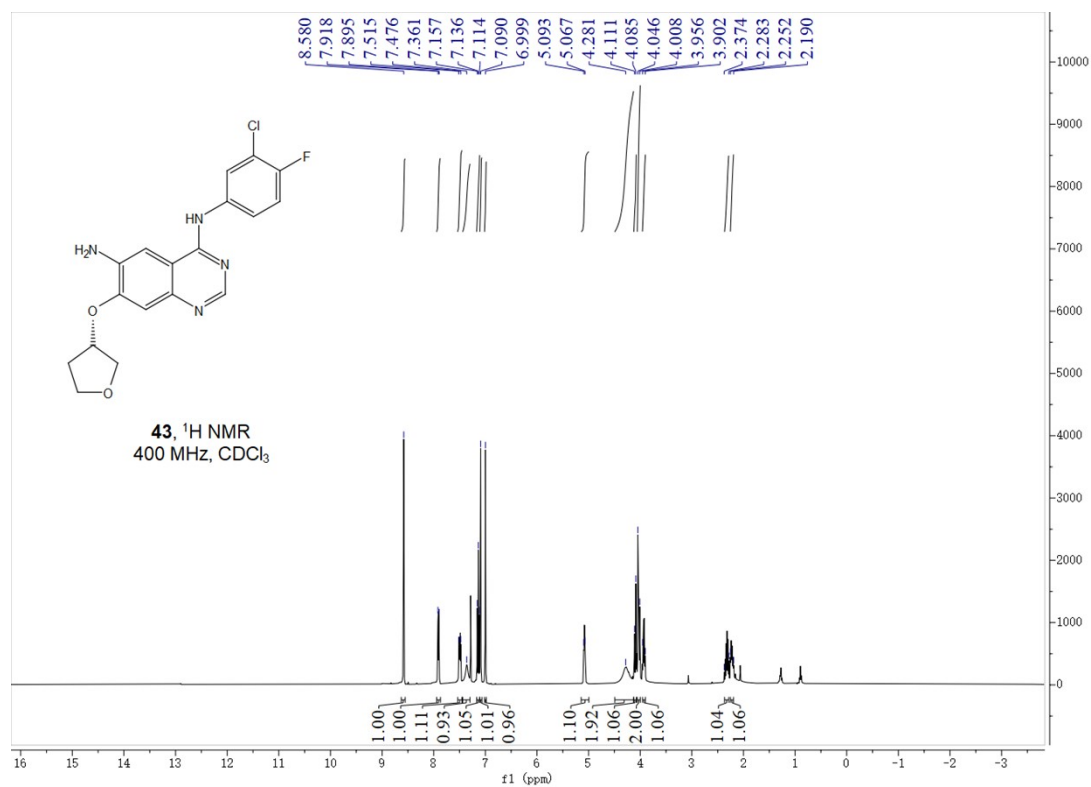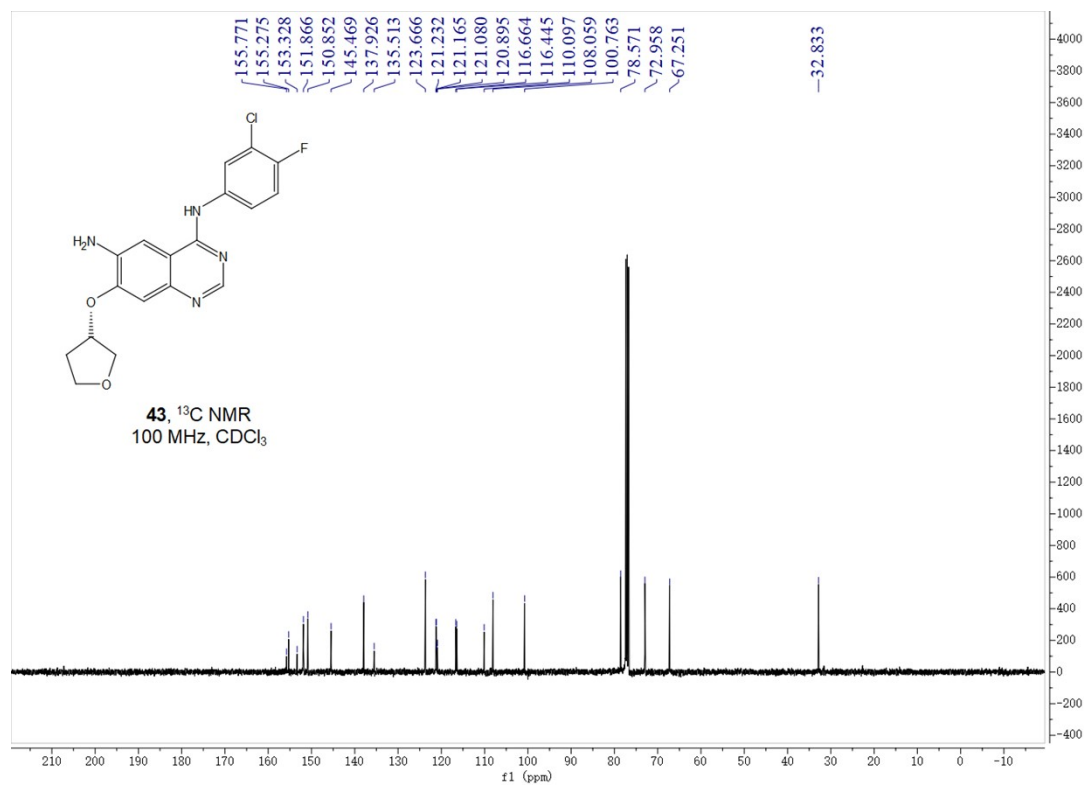

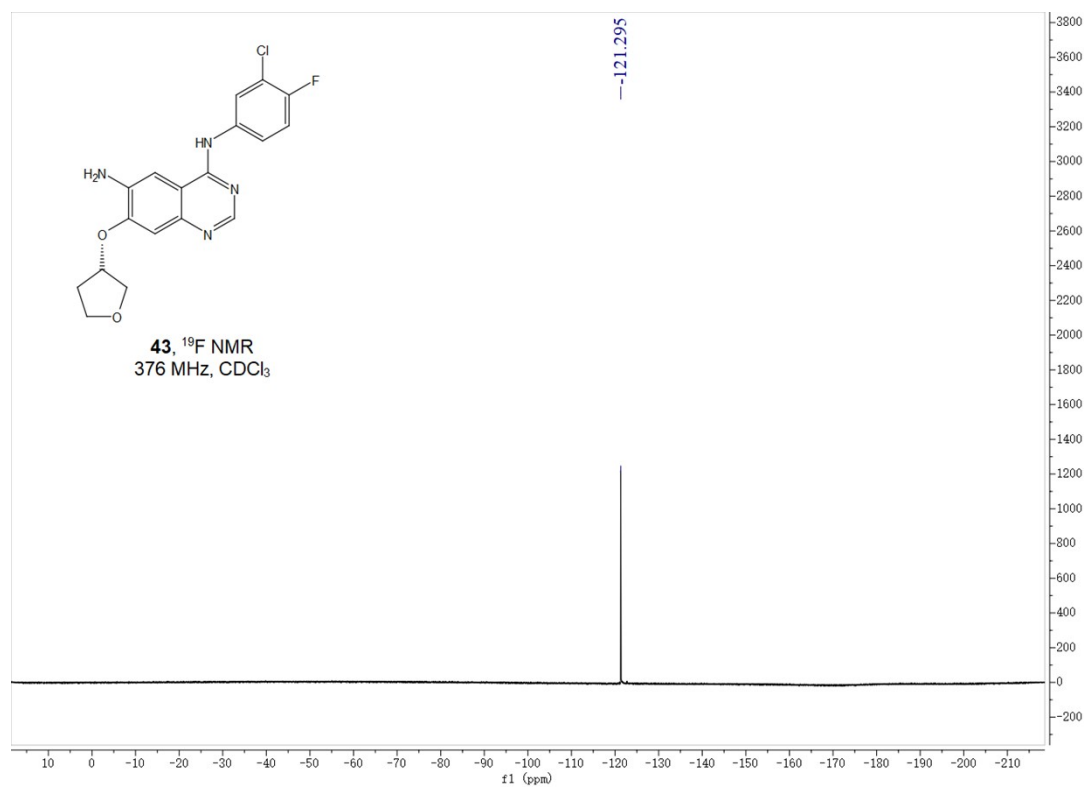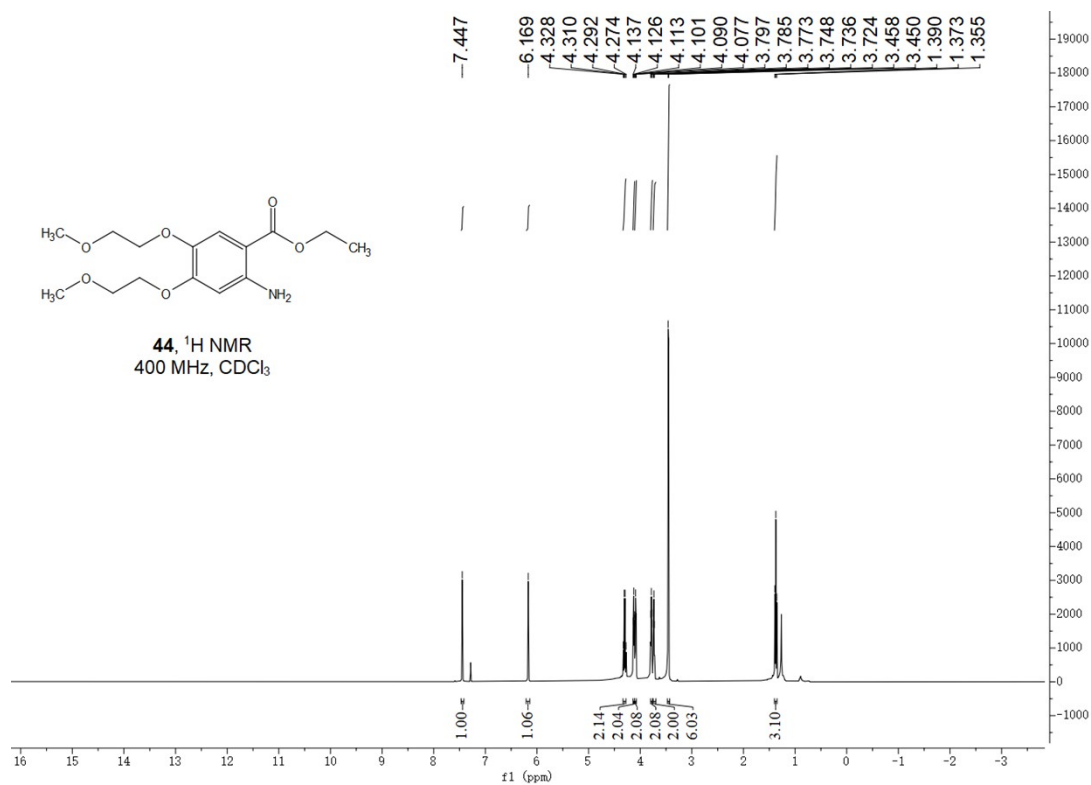

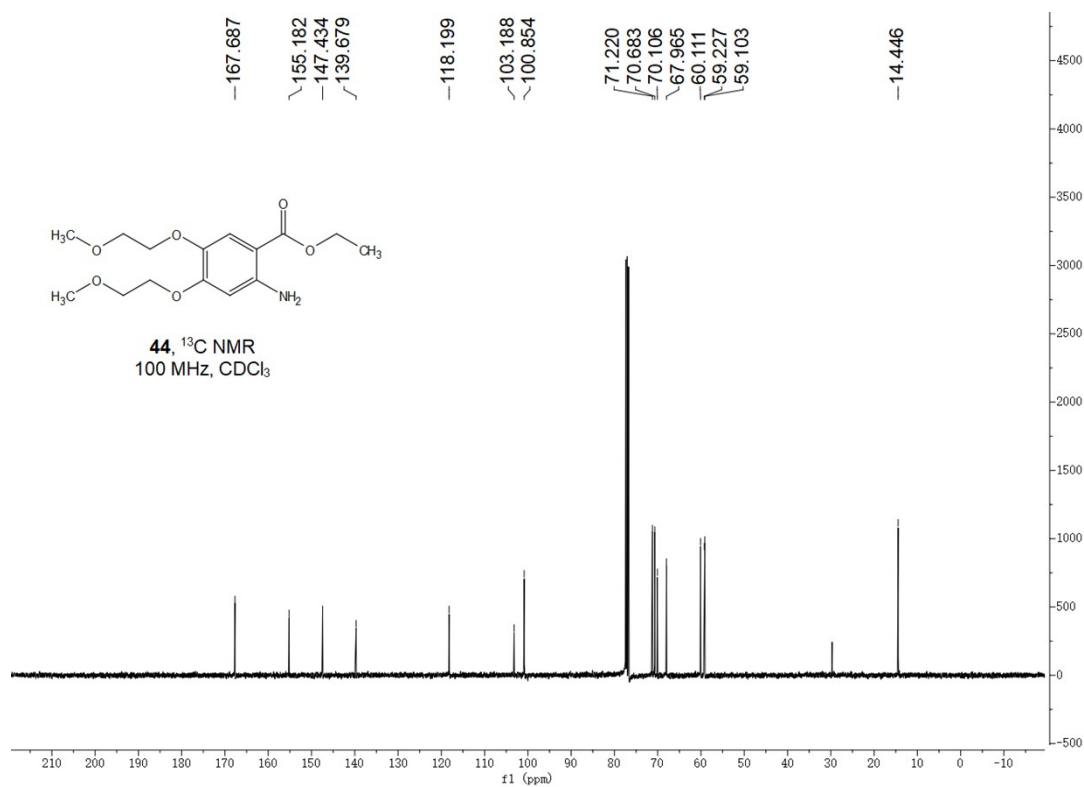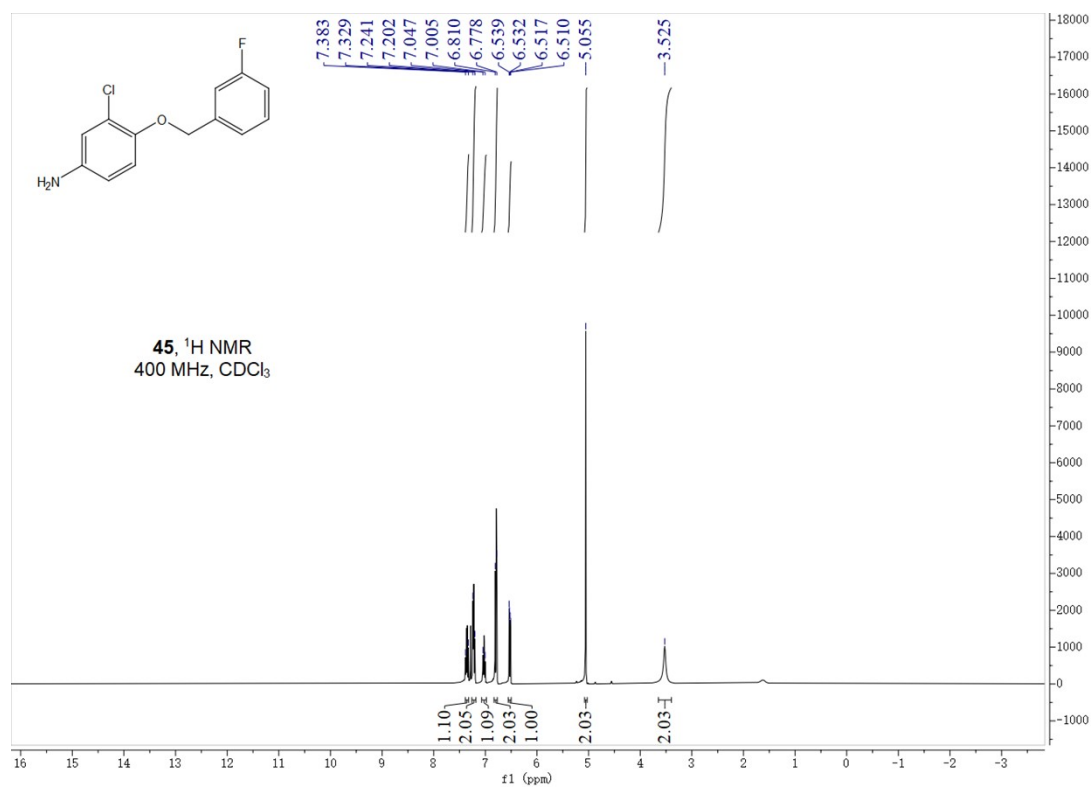

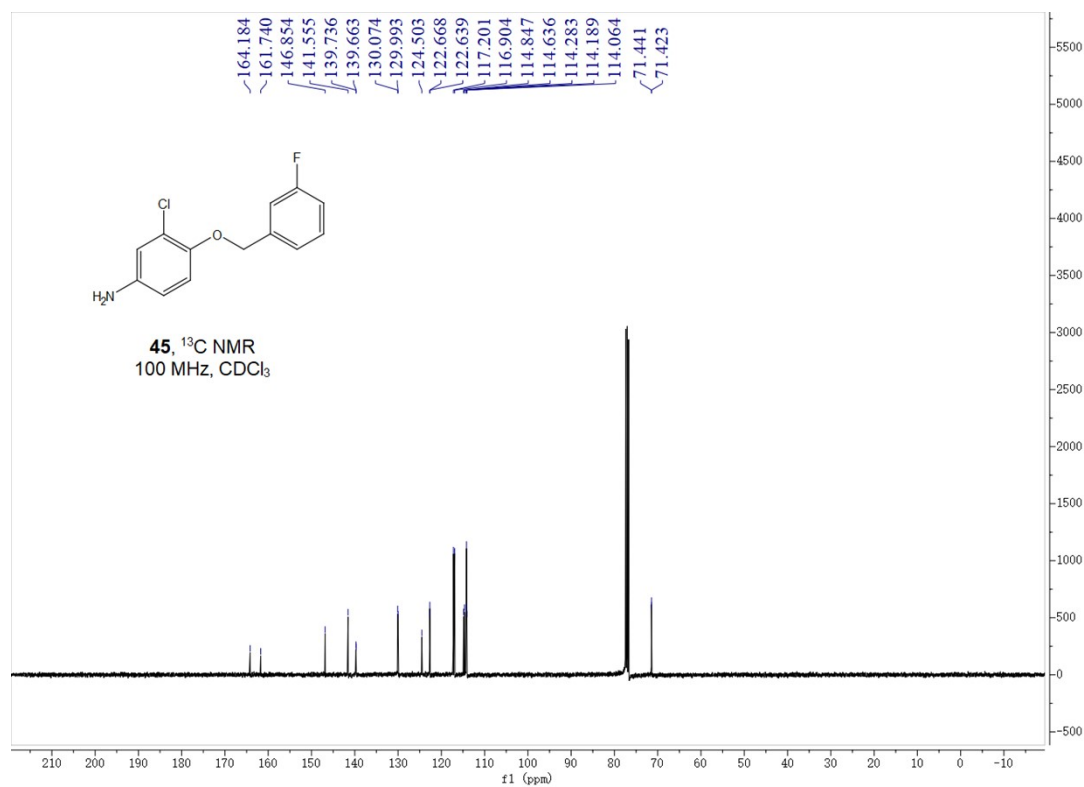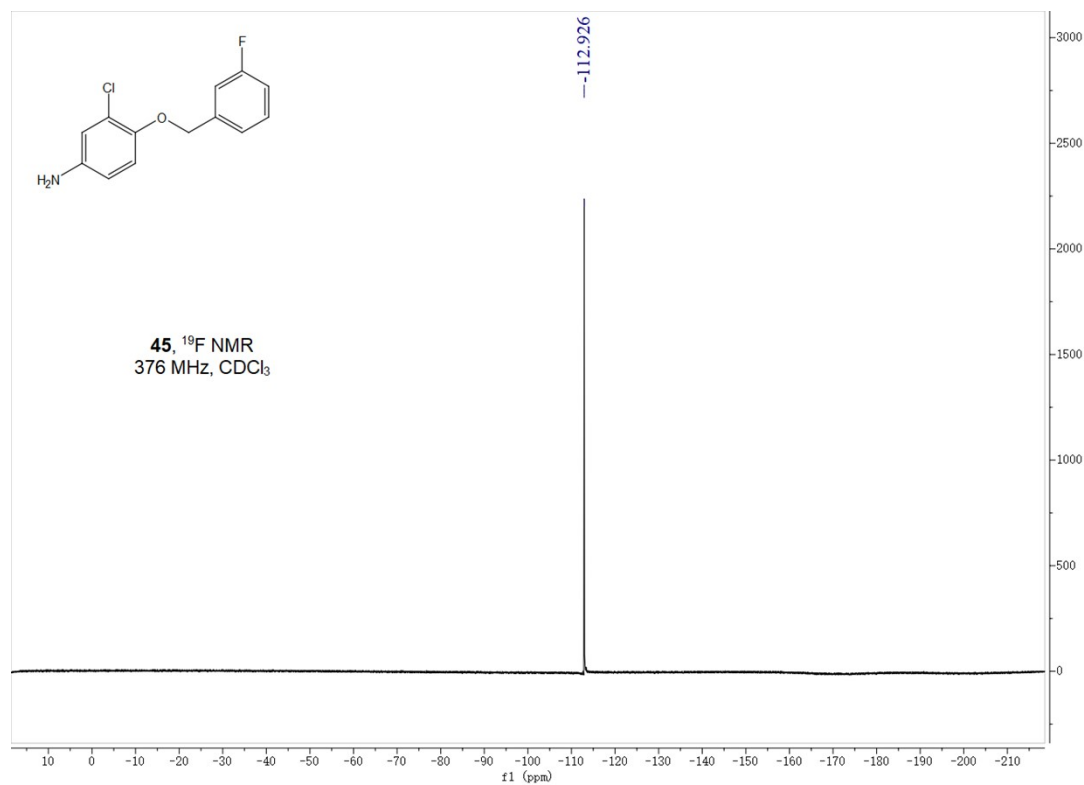

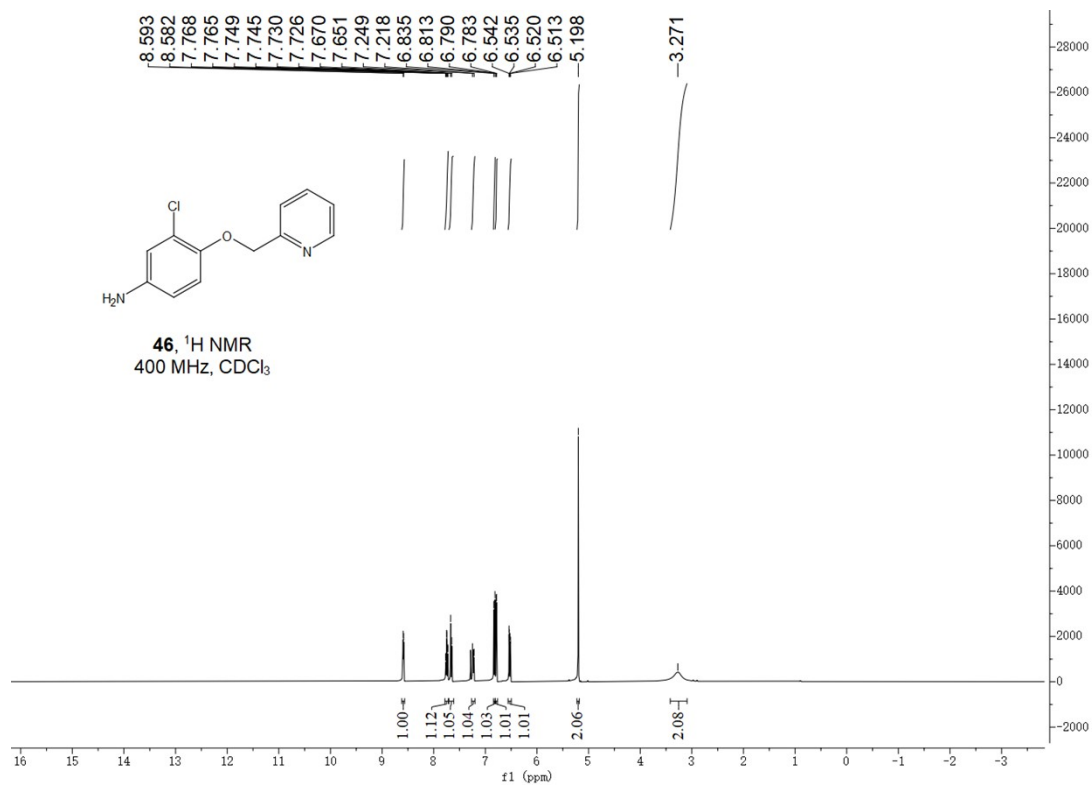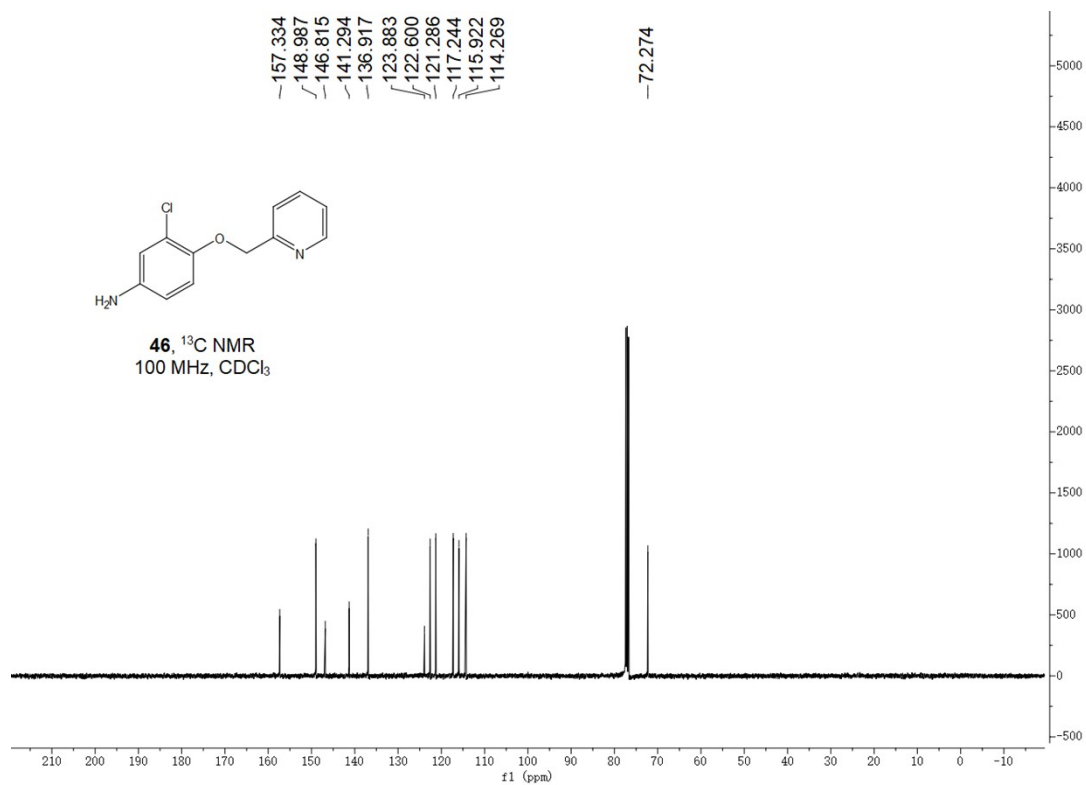

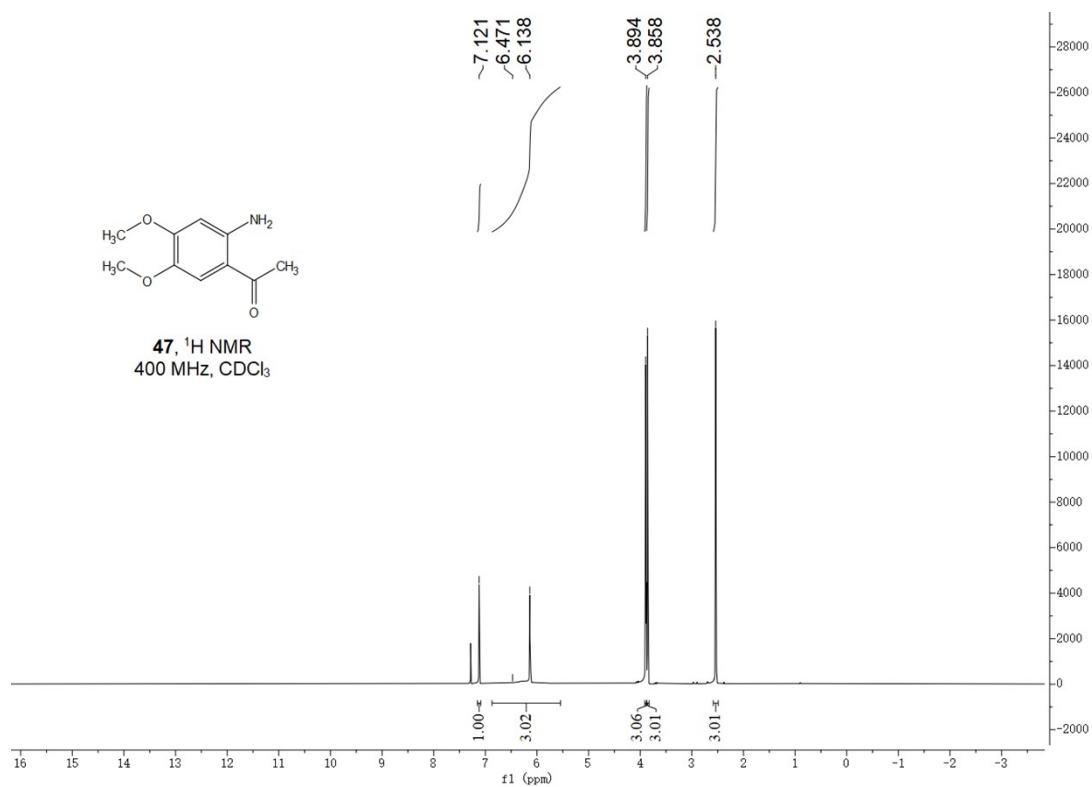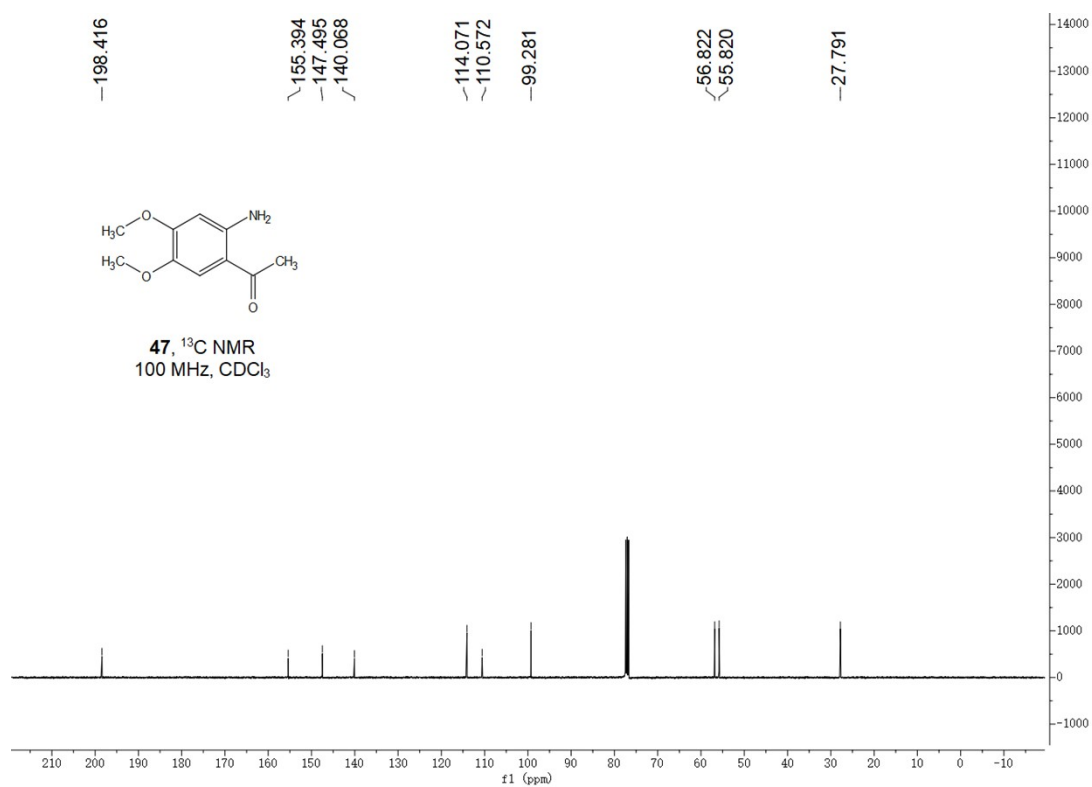

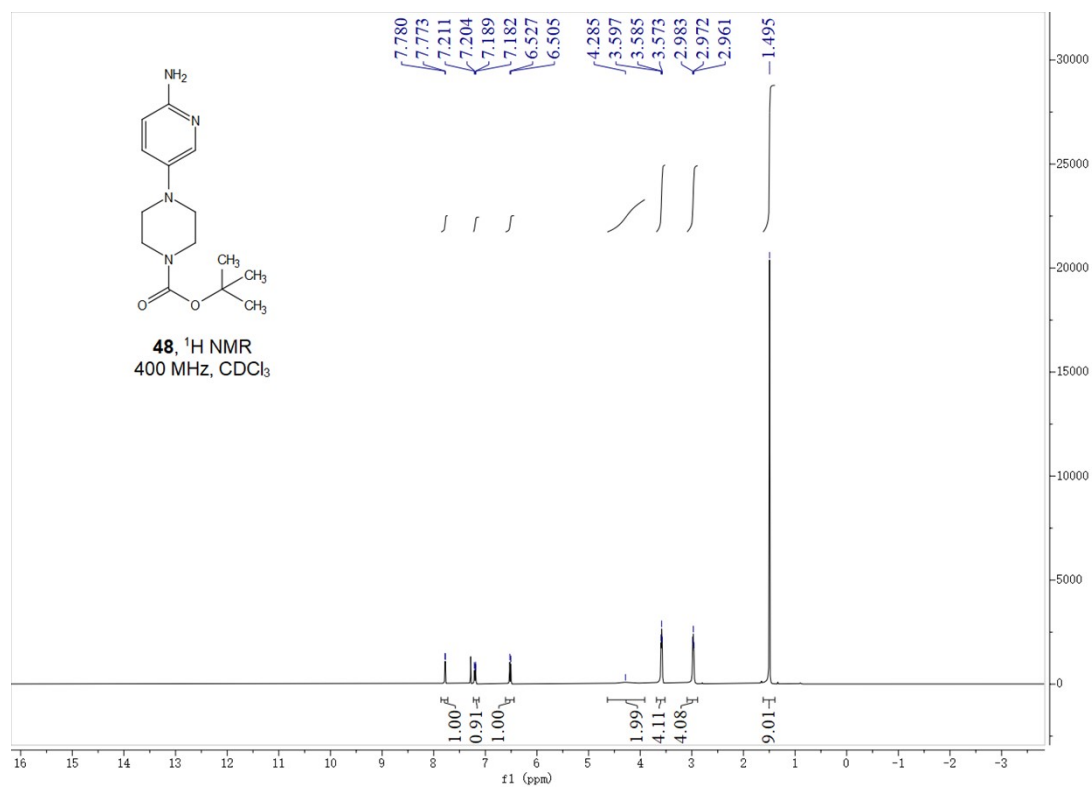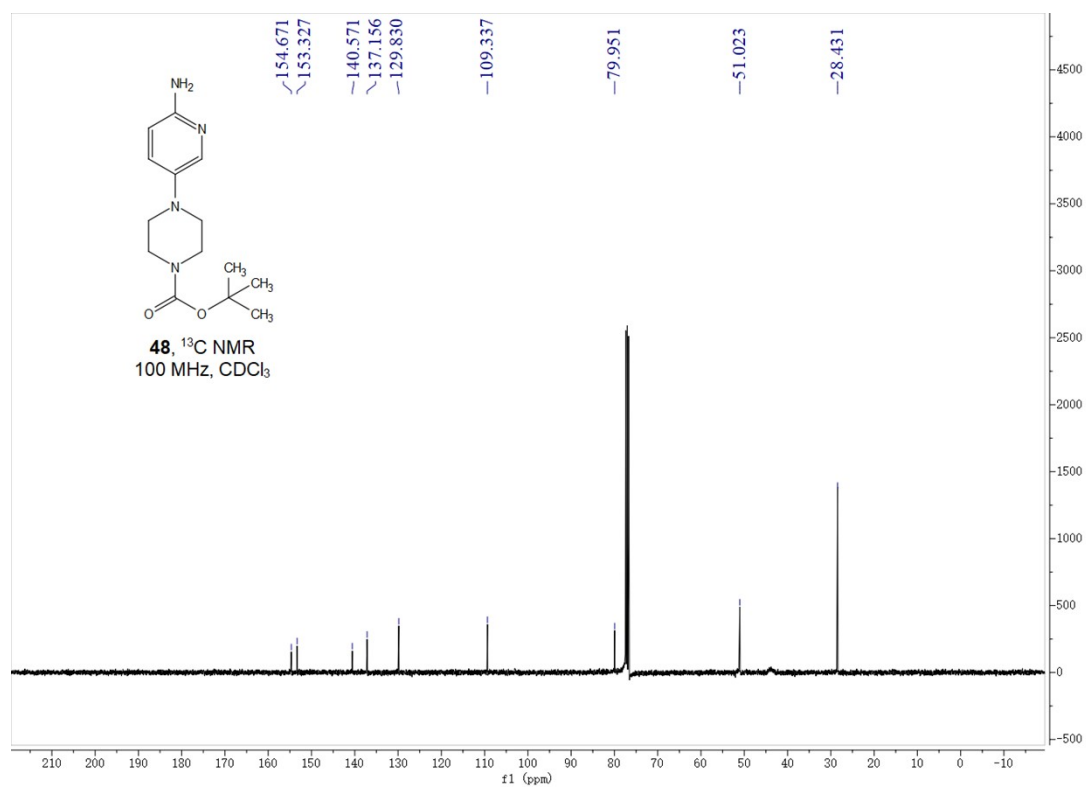

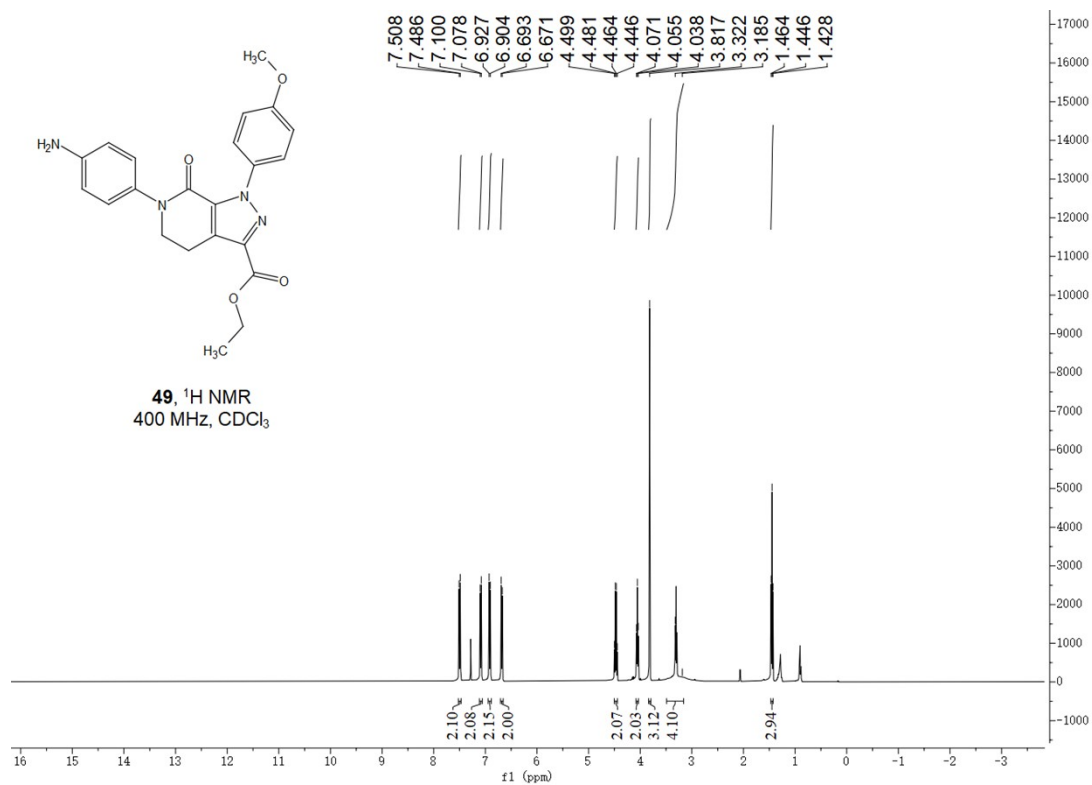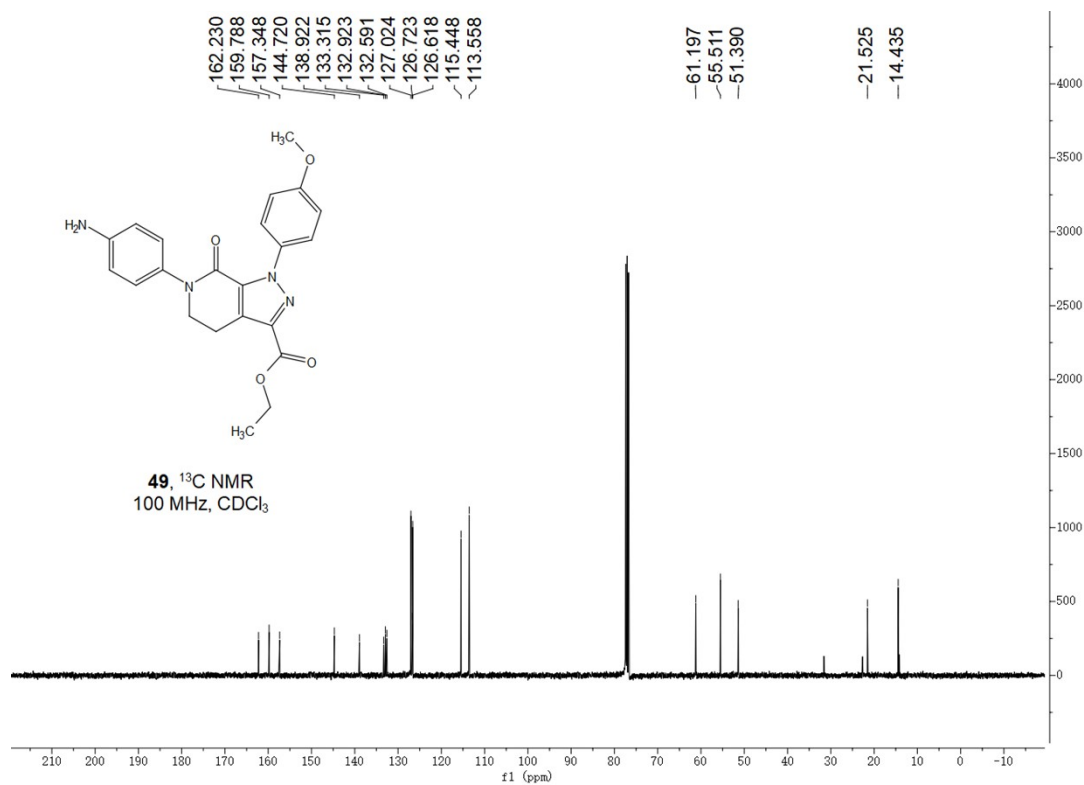



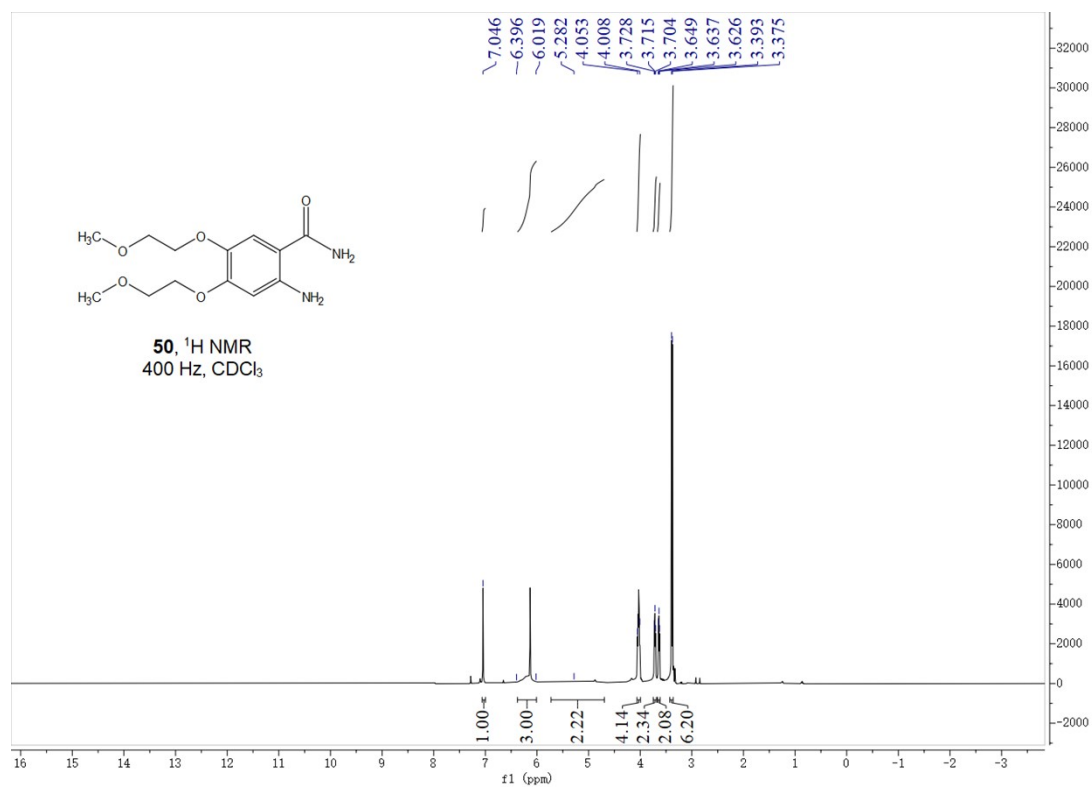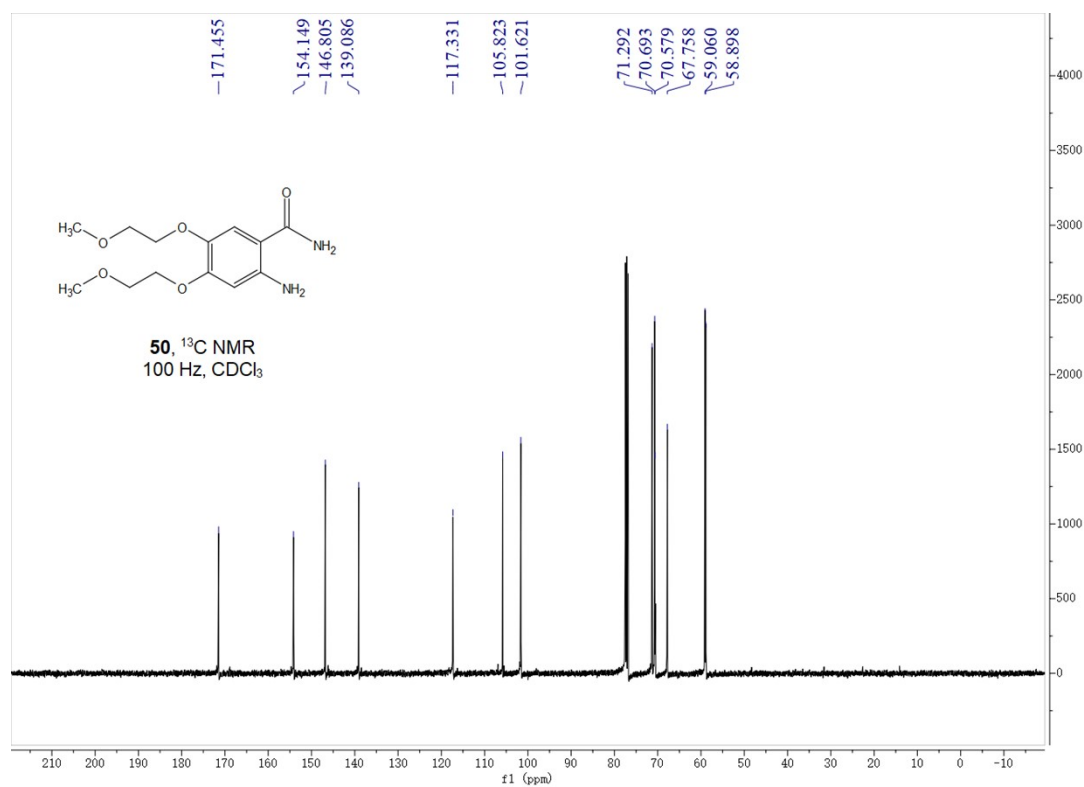

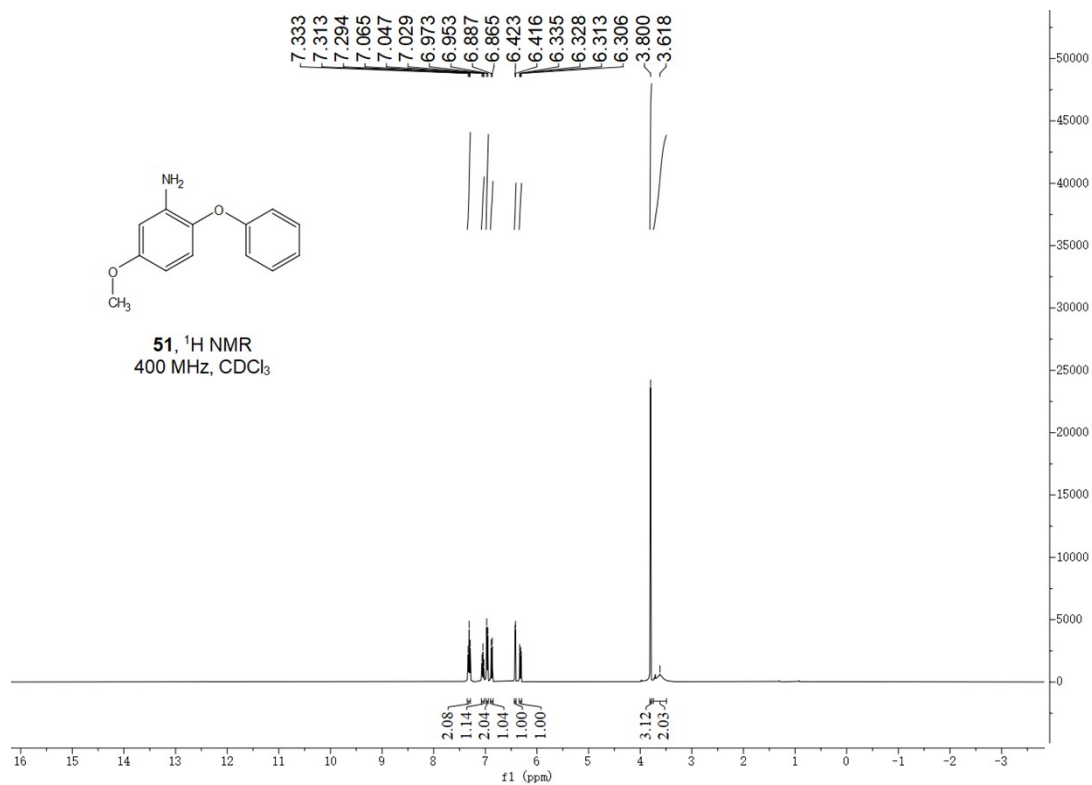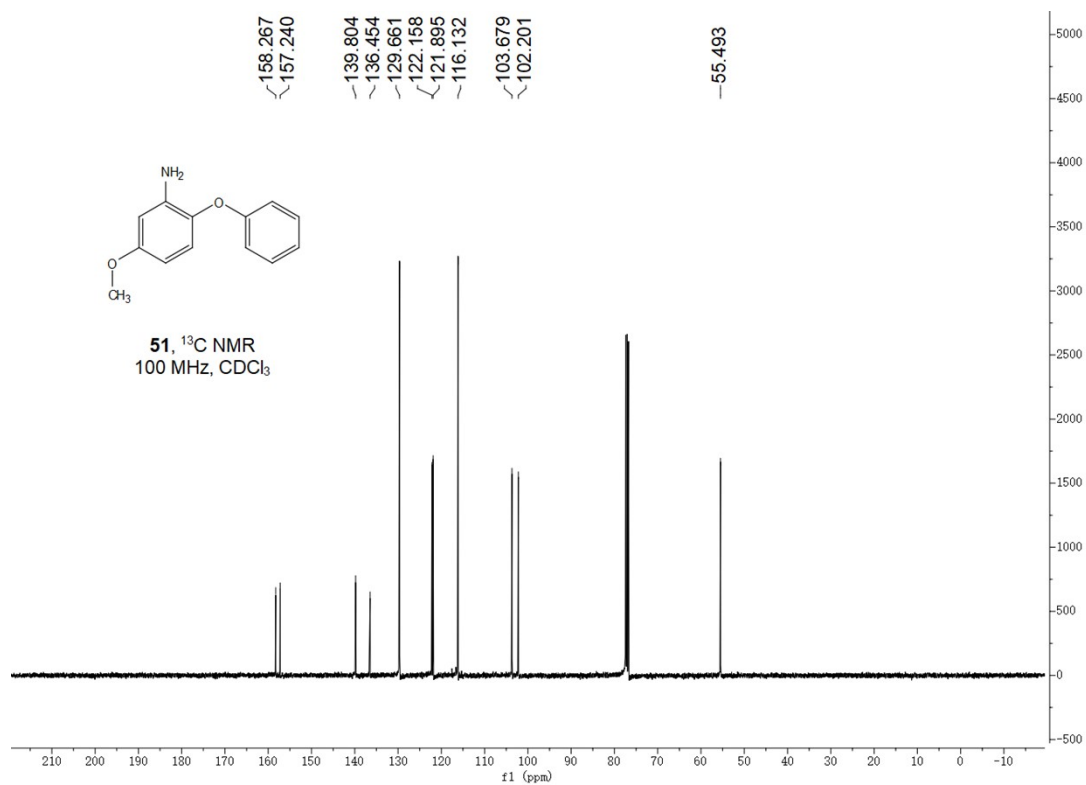

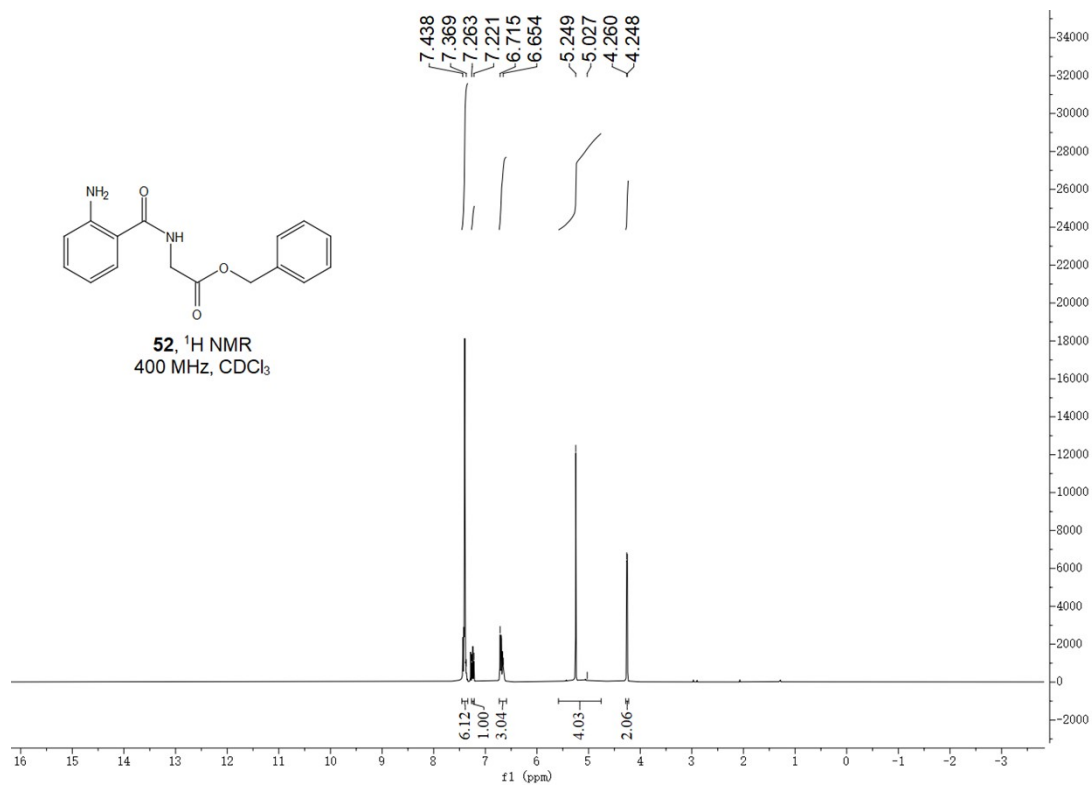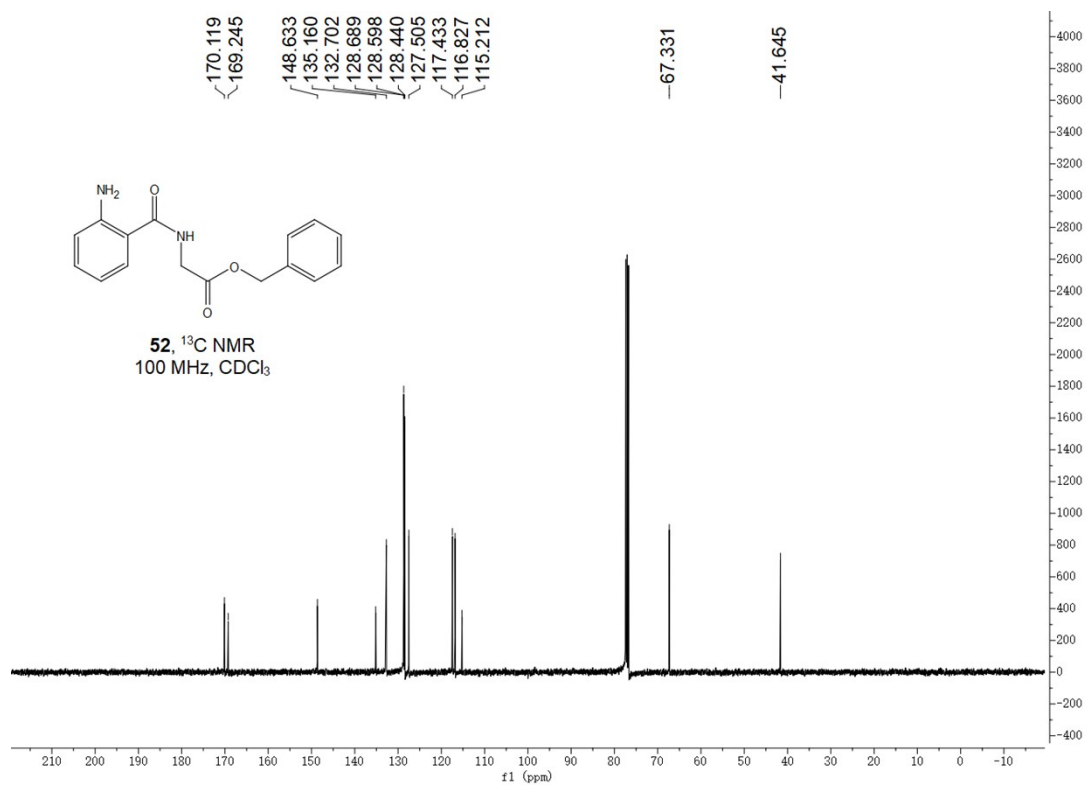

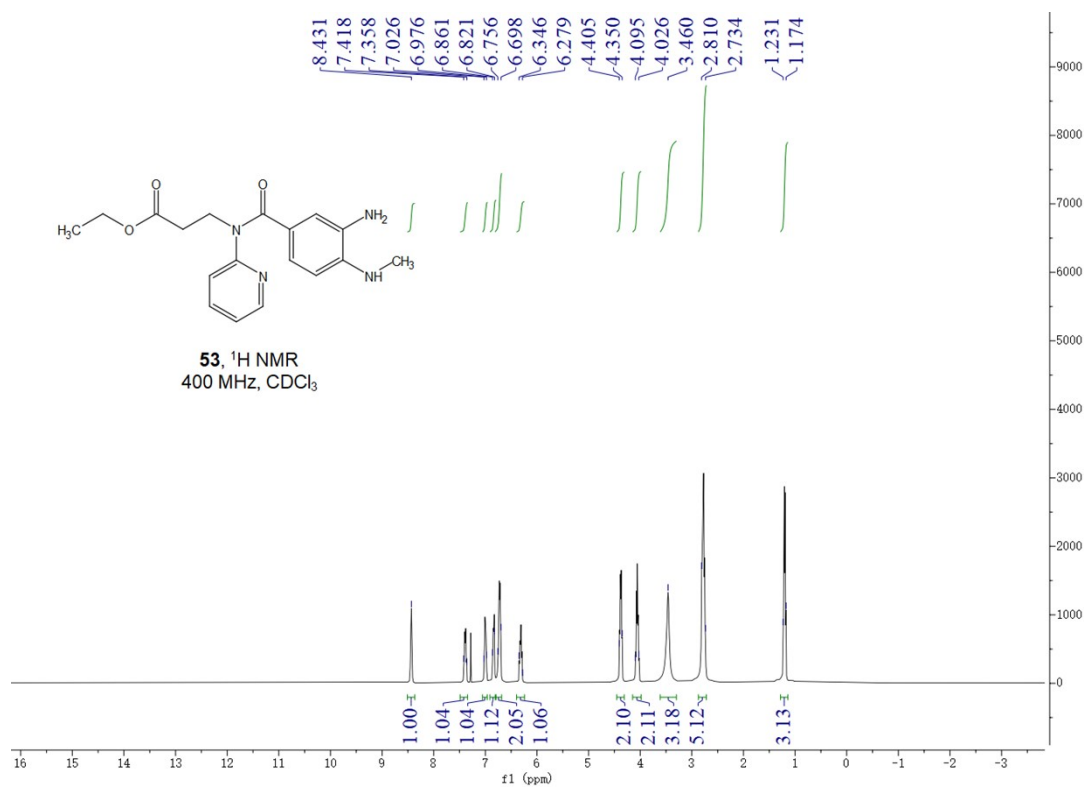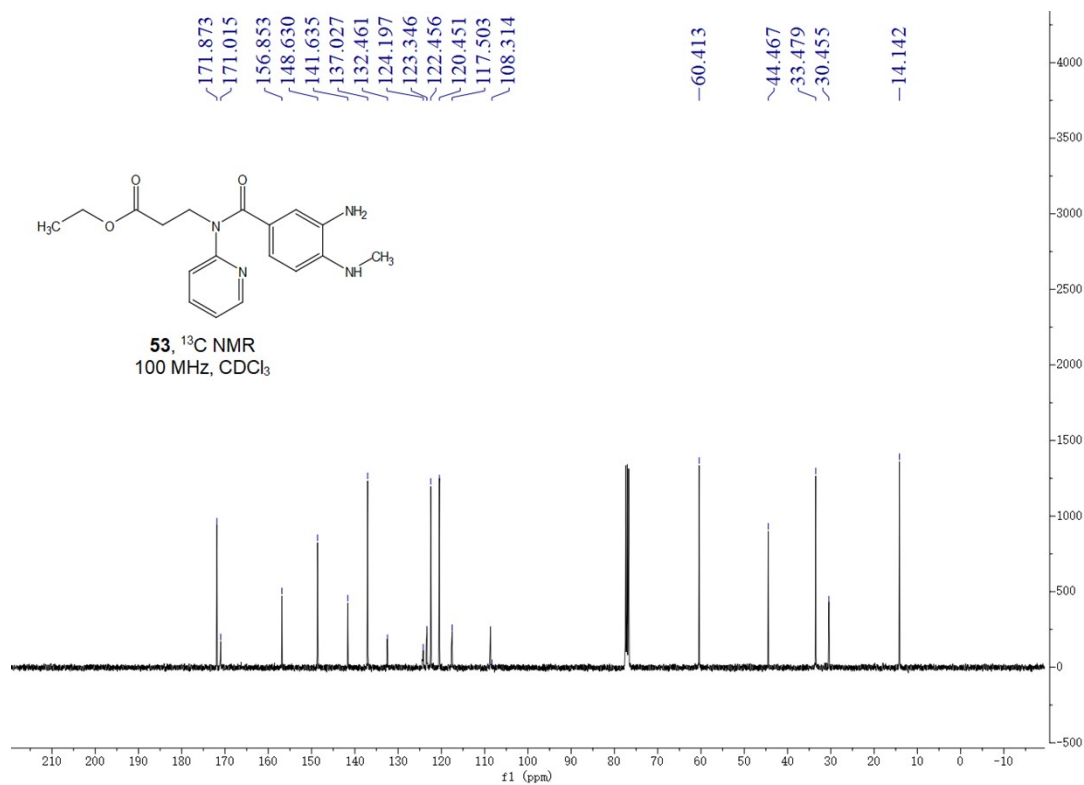

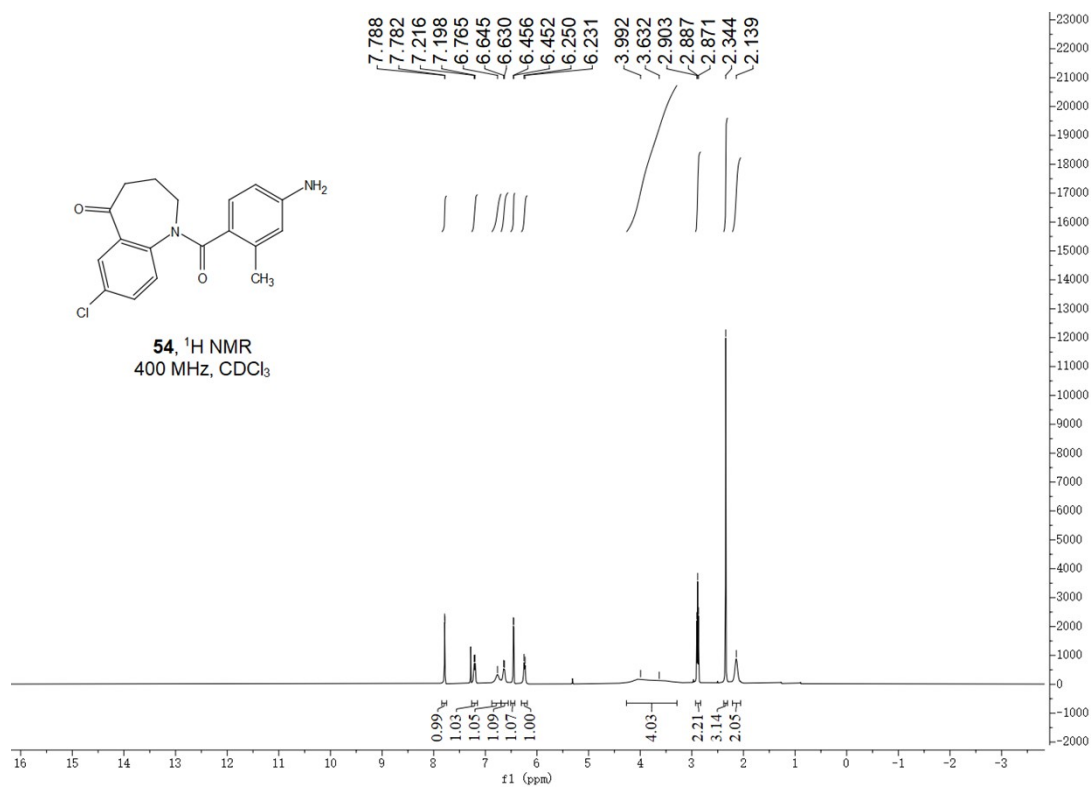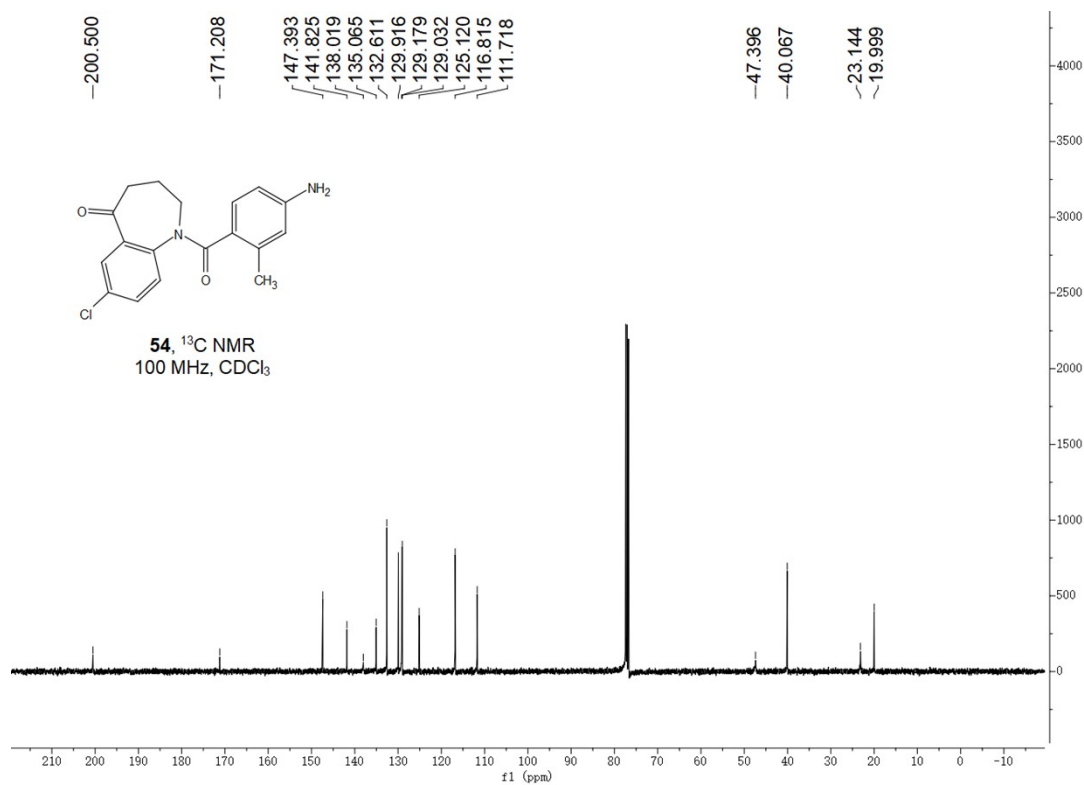

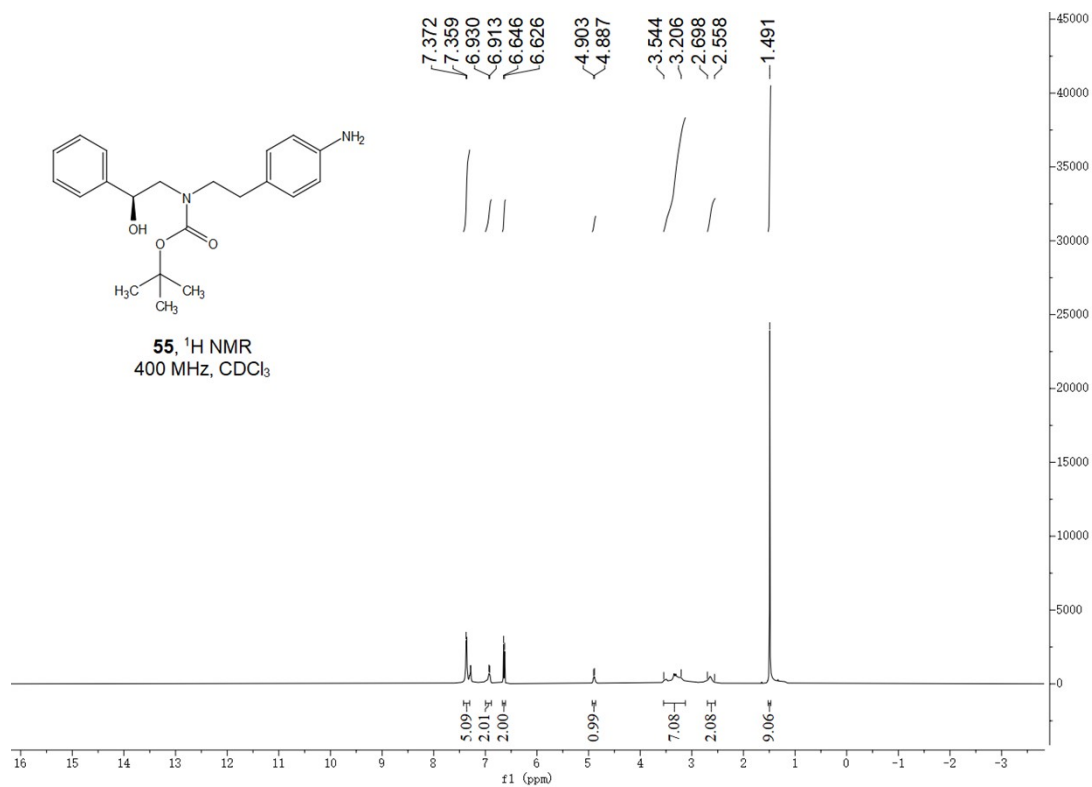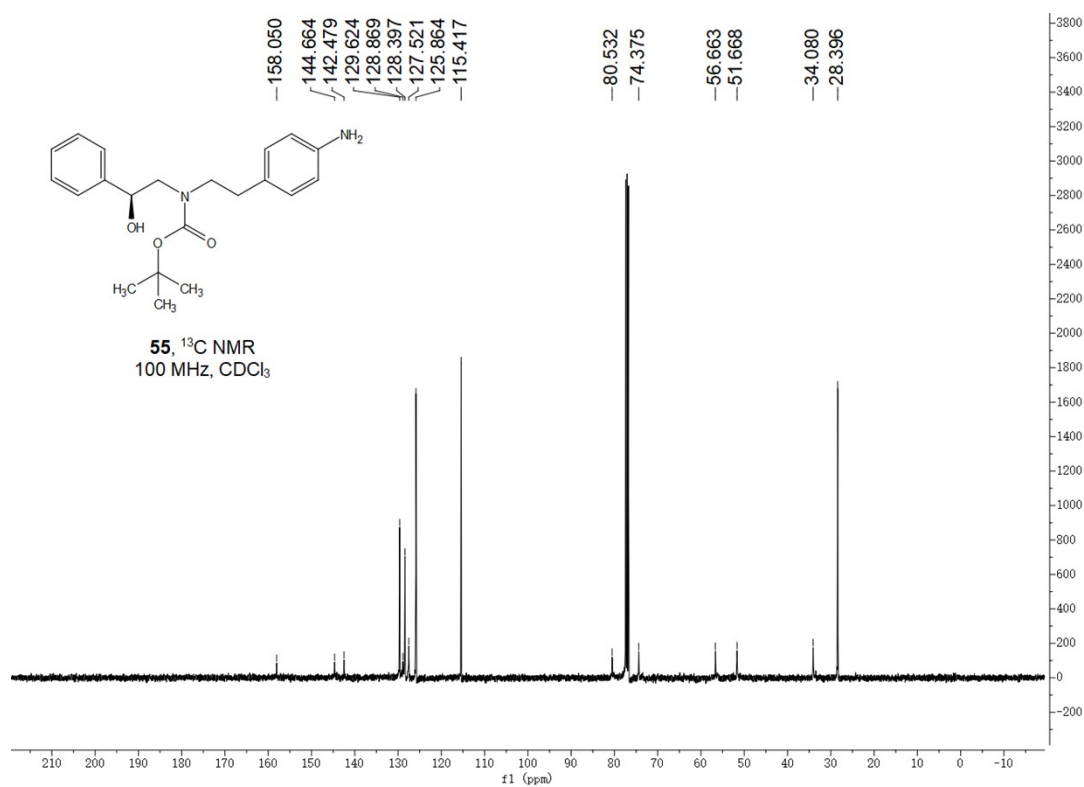

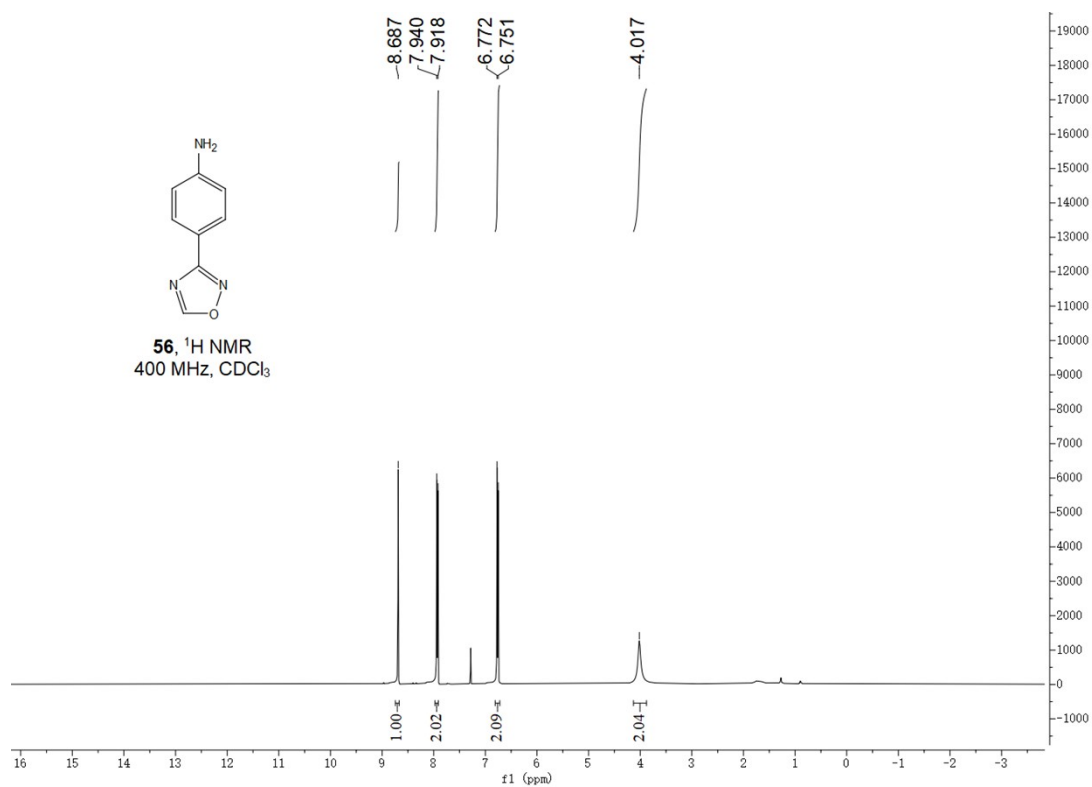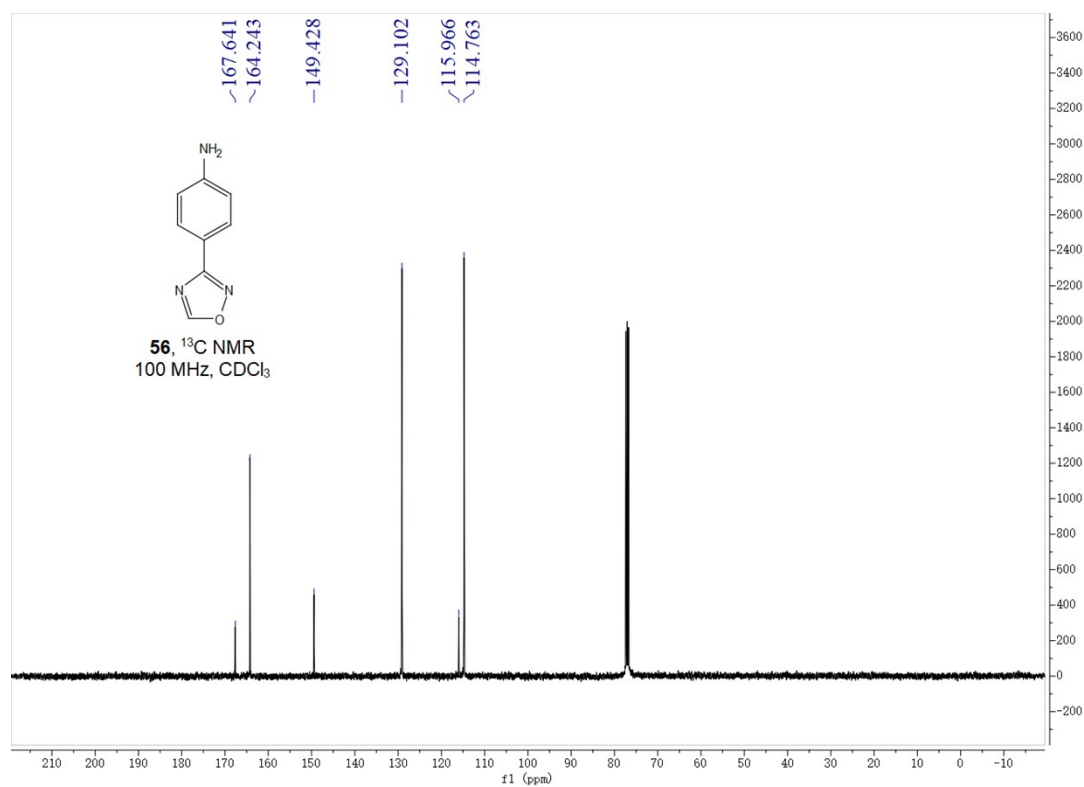

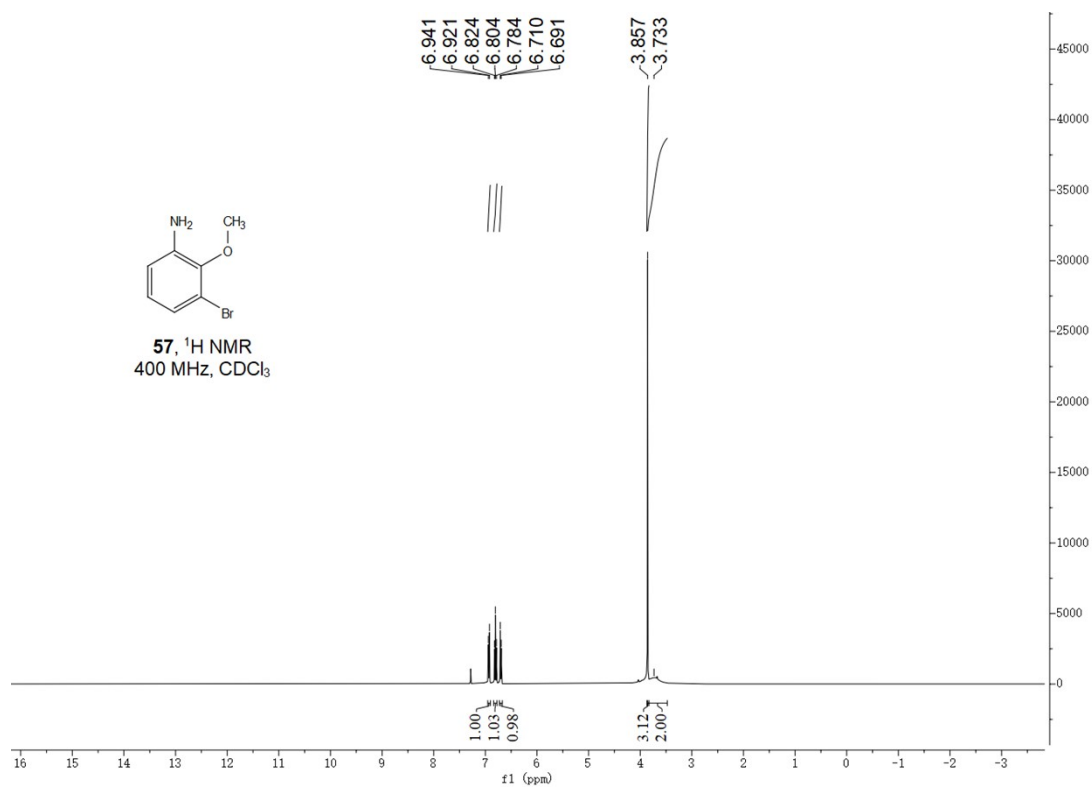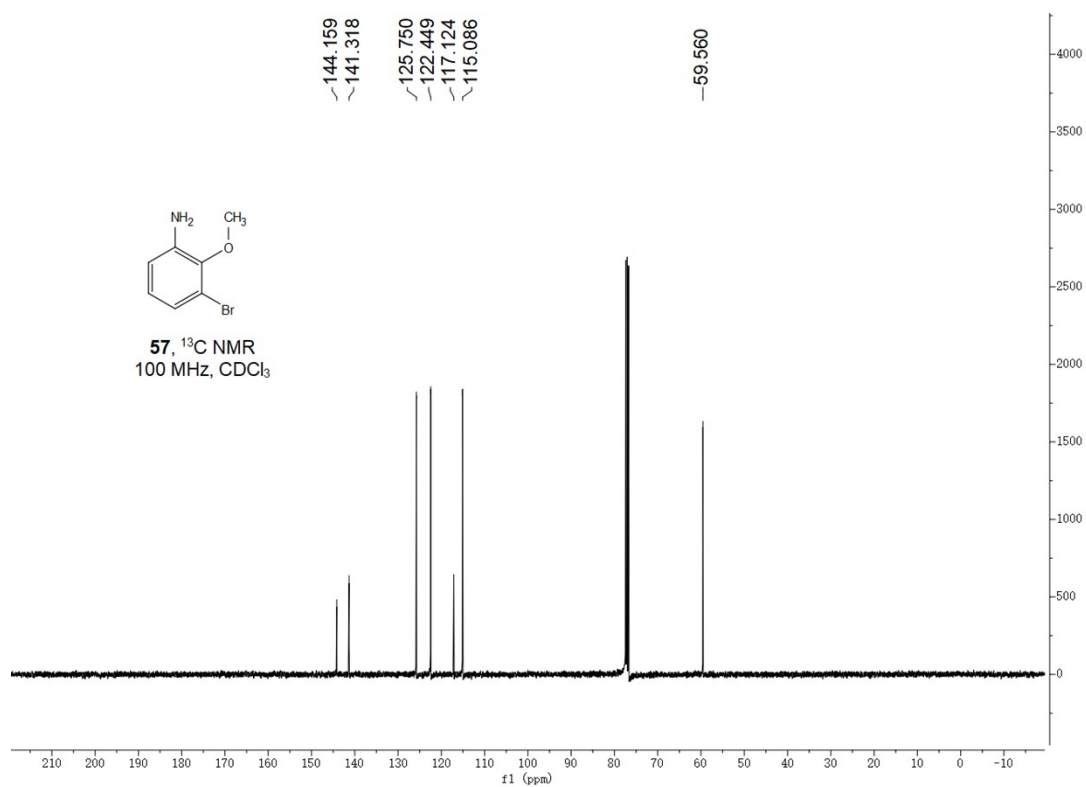



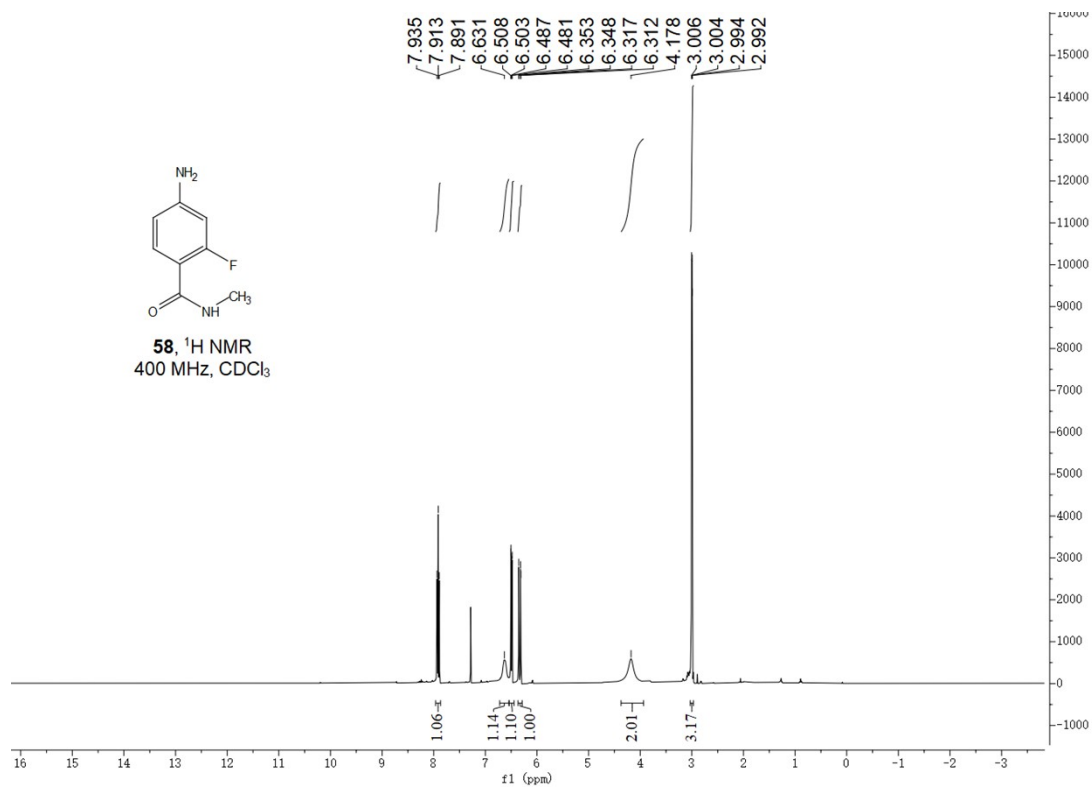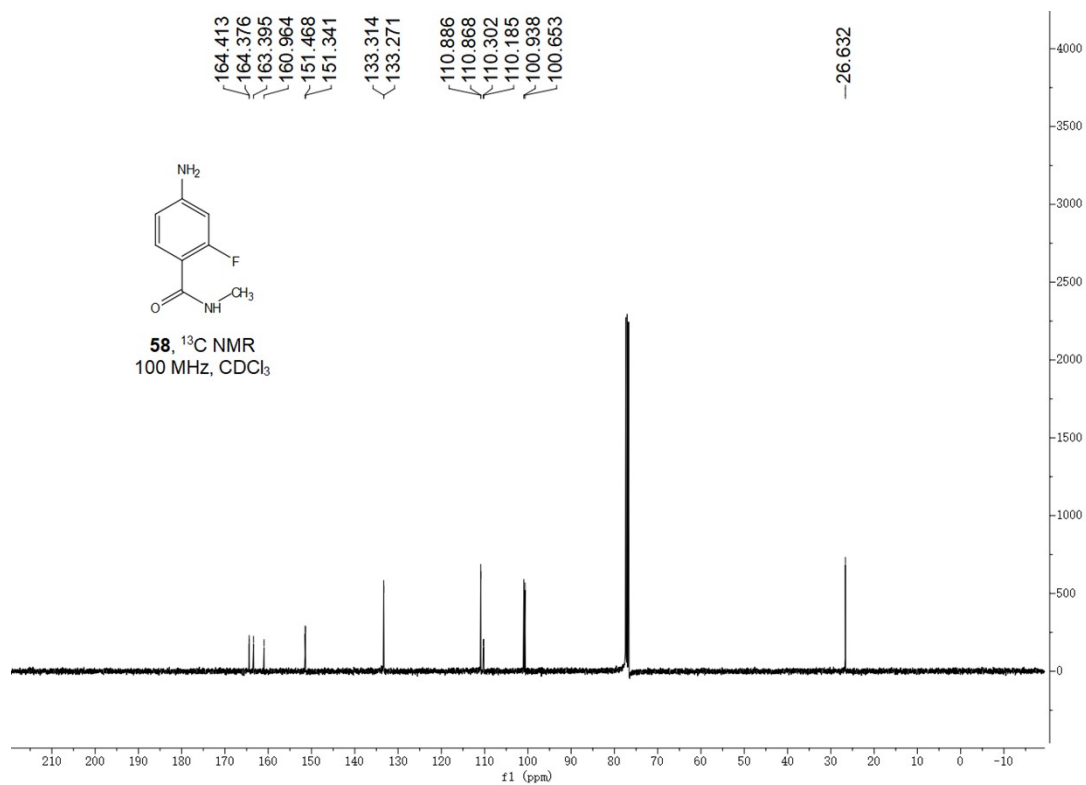

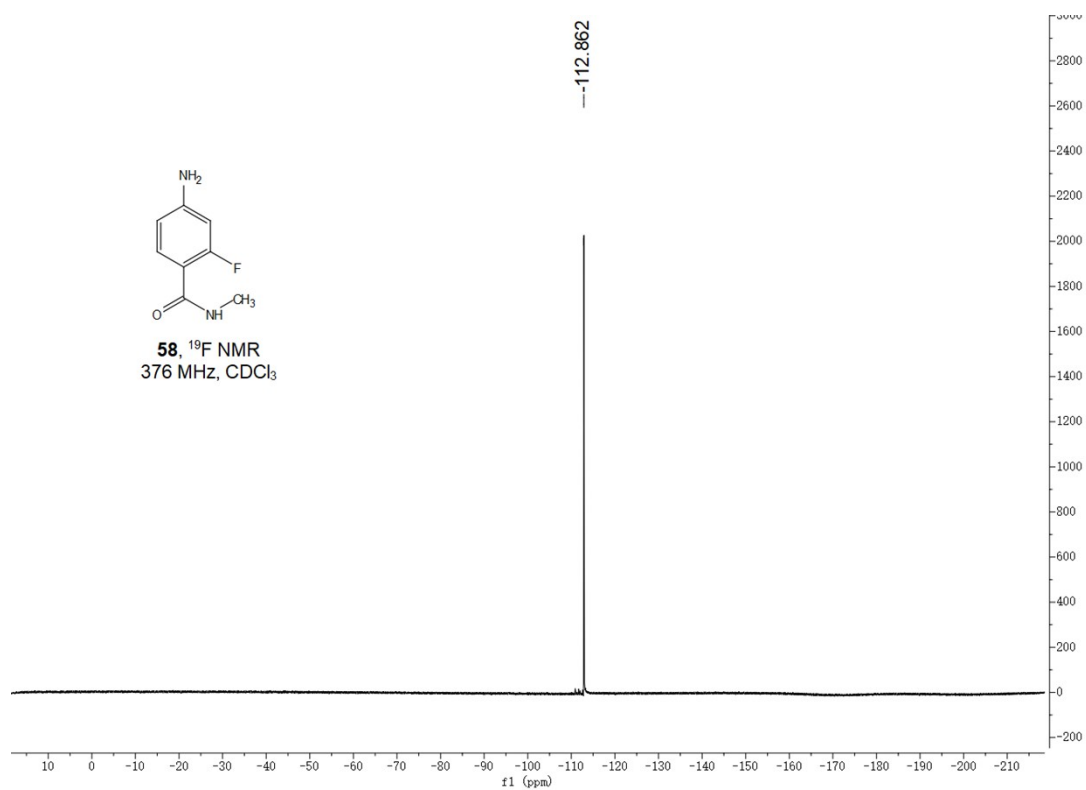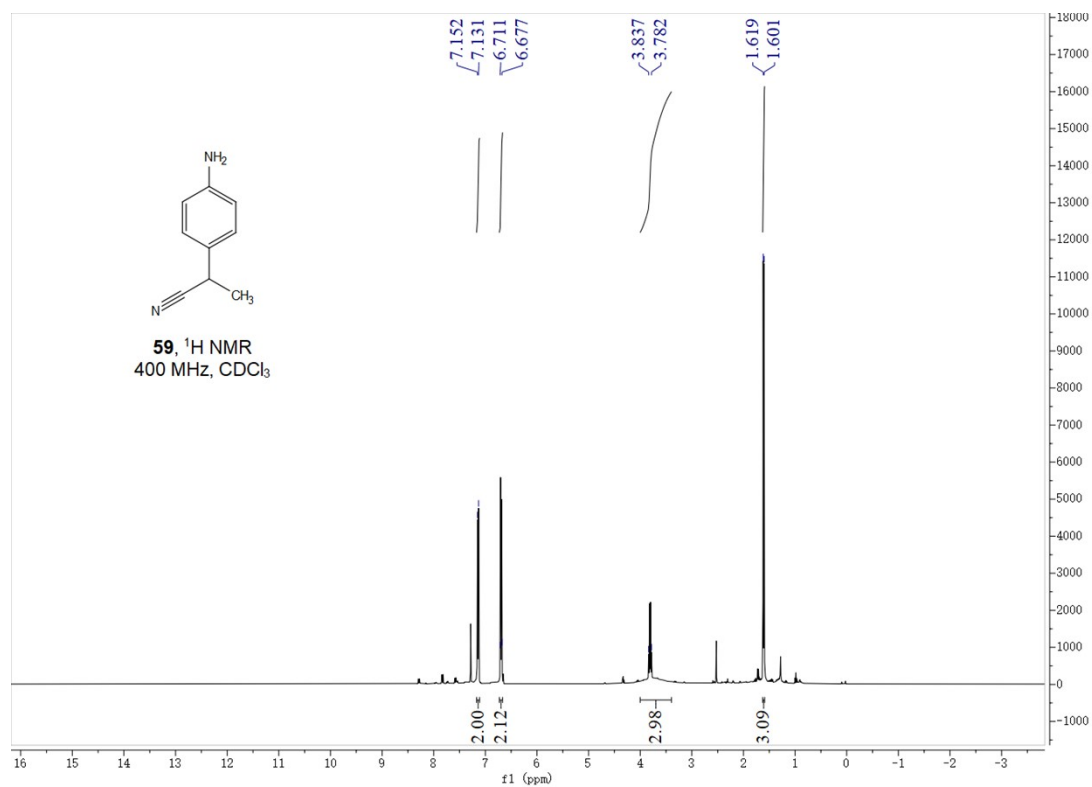

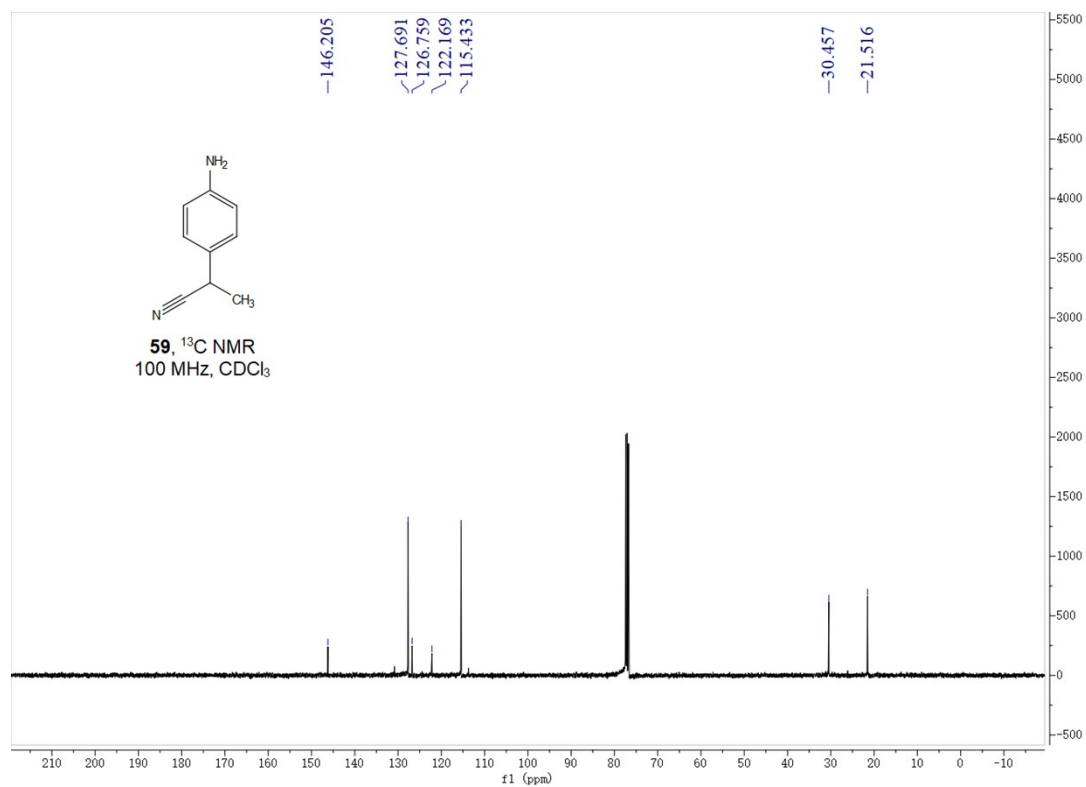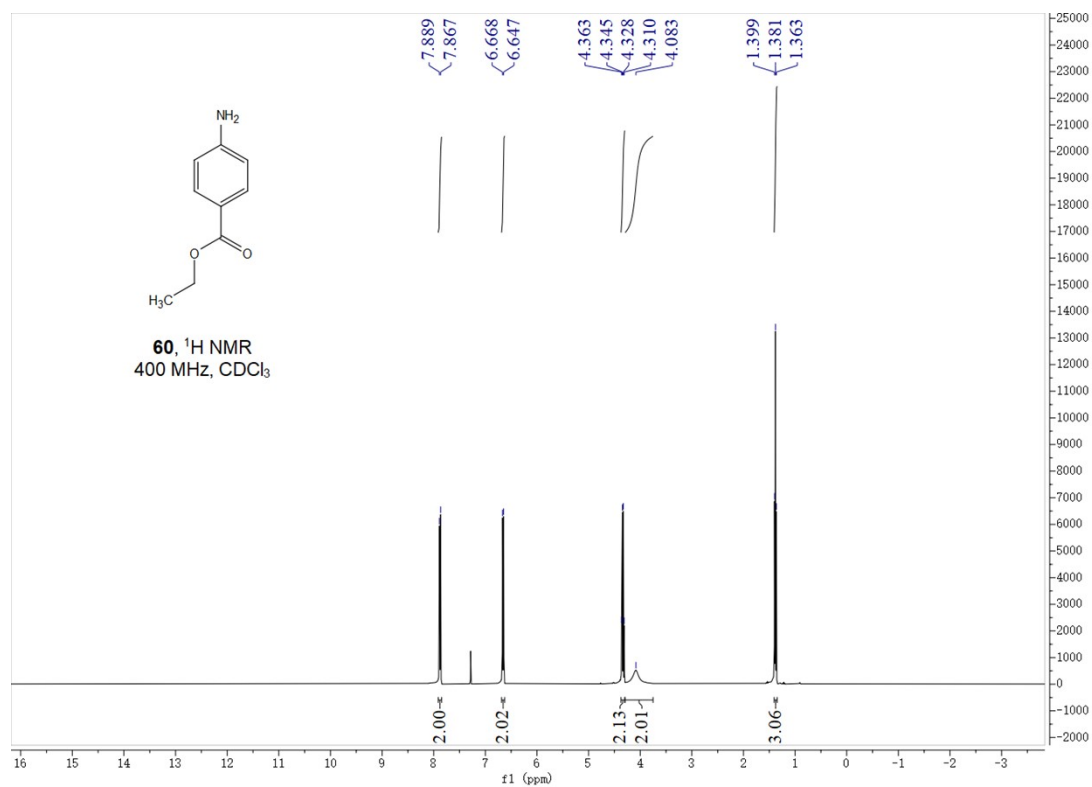

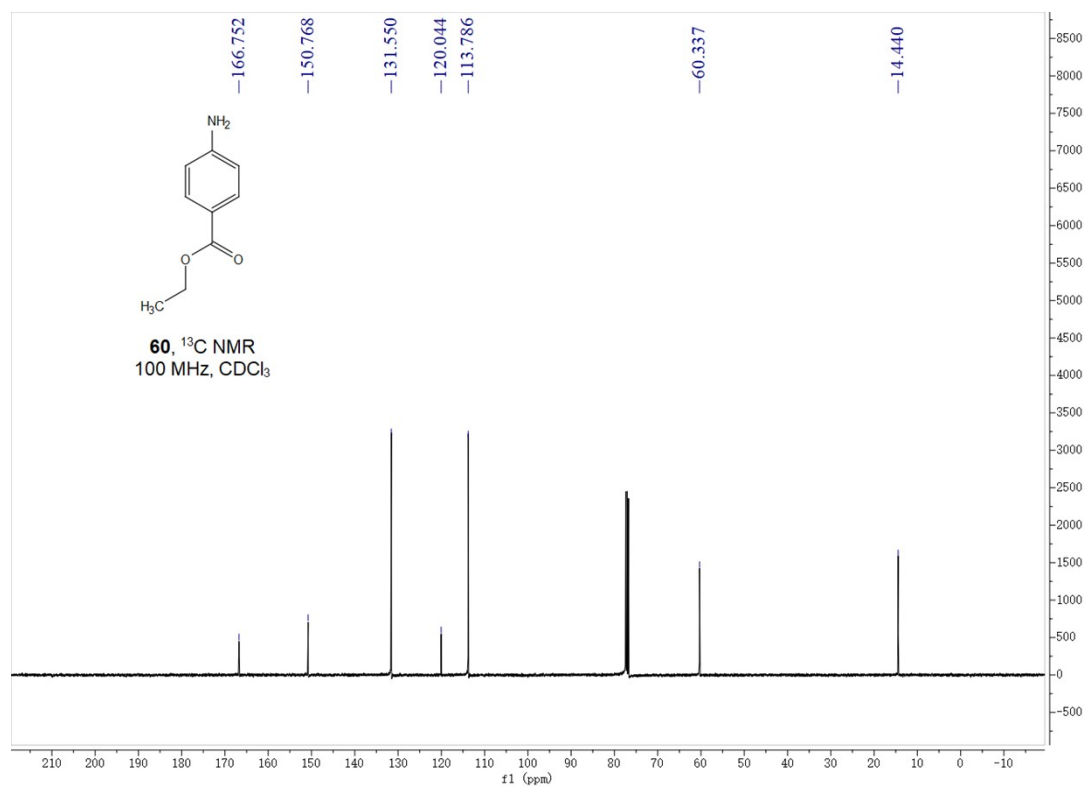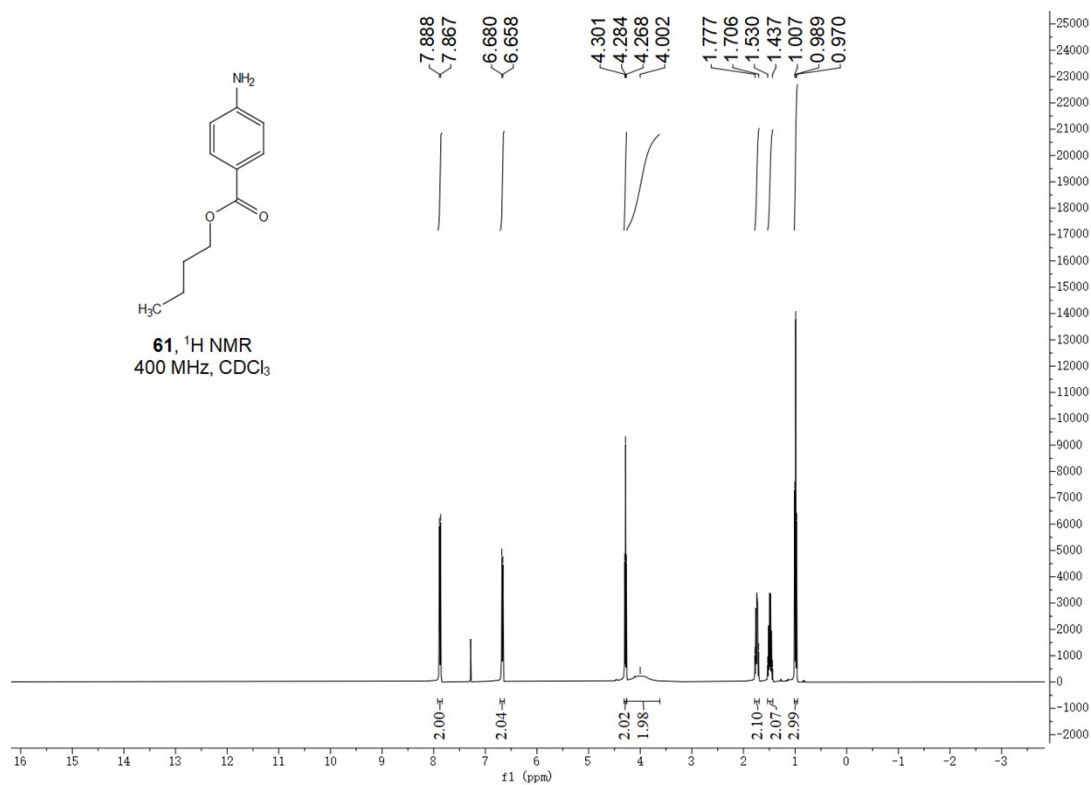

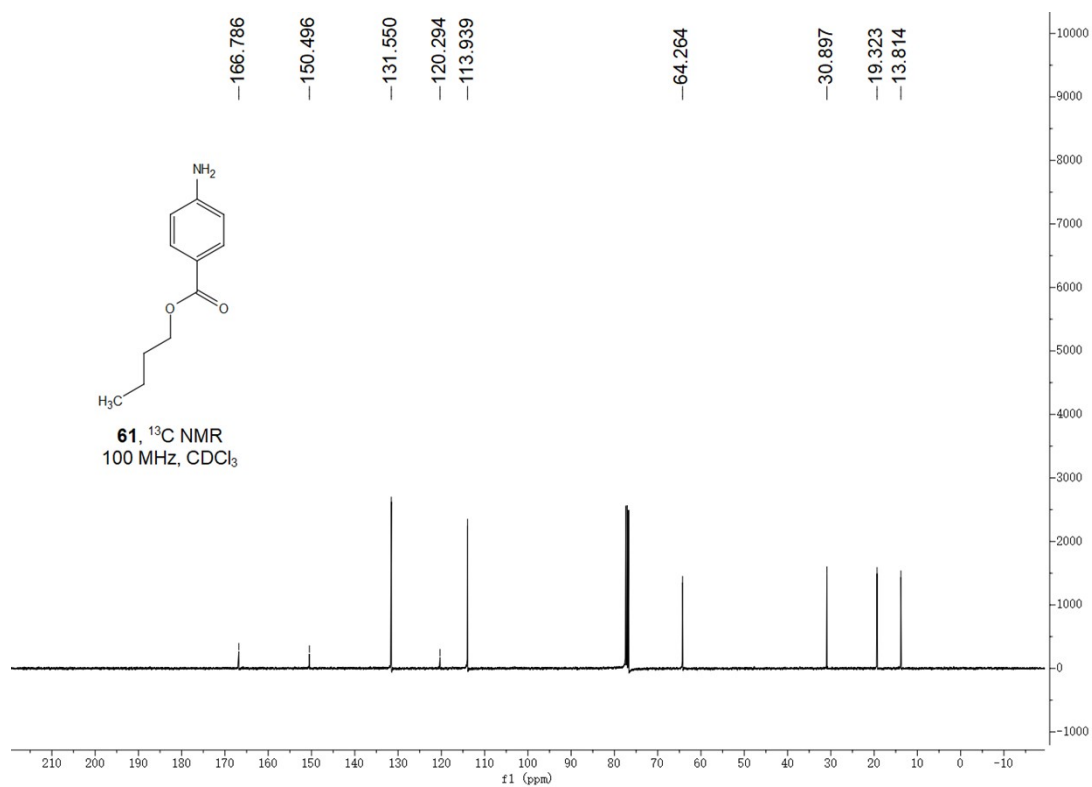

Supplement: d4gc02602k1.pdf [file d4gc02602k1.pdf]
